# Supplementary material for: The relationship between perceived academic stress and college students’ employment anxiety: the mediating role of psychological resilience
Source: Front Psychiatry. 2025 Jun 3;16:1602808. doi: 10.3389/fpsyt.2025.1602808 (PMC12170629; doi:10.3389/fpsyt.2025.1602808)
Supplement: Supplementary file 1 [file Table1.xls]

## Sheet: 123simulated_data_full
性别	年级	专业	户籍地	家庭月收入	是否独生子女	是否有实习经历	是否担任学生干部	ASI_item1	ASI_item2	ASI_item3	ASI_item4	ASI_item5	ASI_item6	ASI_item7	ASI_item8	ASI_item9	ASI_item10	ASI_item11	ASI_item12	ASI_item13	ASI_item14	ASI_item15	ASI_item16	ASI_item17	ASI_item18	ASI_item19	ASI_item20	ASI_item21	ASI_item22	ASI_item23	ASI_item24	ASI_item25	ASI_item26	ASI_item27	ASI_item28	ASI_item29	ASI_item30	ASI_item31	ASI_item32	ASI_item33	ASI_item34	ASI_总分	CDRISC_item1	CDRISC_item2	CDRISC_item3	CDRISC_item4	CDRISC_item5	CDRISC_item6	CDRISC_item7
1	1	2	2	2	0	0	0	3	4	3	3	2	3	3	3	3	3	2	4	4	3	3	2	3	4	3	4	3	3	4	2	3	3	3	3	3	3	3	3	3	3	104	3	3	4	3	3	2	3
2	1	1	2	1	0	0	1	3	3	3	3	3	4	3	4	3	3	3	3	3	3	3	3	3	4	4	4	3	4	4	3	3	3	3	3	3	4	4	3	5	3	113	1	1	1	1	1	0	2
2	2	3	1	1	1	0	1	3	3	3	3	2	4	3	3	2	3	3	3	3	3	3	2	3	3	3	3	3	2	3	3	3	3	3	3	3	3	4	3	4	3	101	2	2	3	2	2	2	3
1	2	3	1	1	0	0	0	4	3	2	4	3	2	3	4	4	3	3	4	3	3	3	3	3	3	2	4	3	3	3	3	3	3	4	3	3	2	3	3	3	4	106	0	1	1	1	2	1	1
1	4	1	2	2	0	0	1	3	3	3	4	3	4	3	3	4	3	2	2	2	3	2	2	3	2	3	3	3	3	3	3	3	2	3	3	3	3	3	2	3	2	96	2	2	2	2	2	2	2
2	4	1	2	3	1	0	1	3	2	2	4	3	2	3	2	3	4	3	4	3	3	3	3	3	2	3	3	4	3	2	2	3	3	3	3	3	3	3	2	2	3	97	2	2	2	2	3	2	2
2	4	2	2	1	0	0	0	3	4	4	2	3	3	3	3	3	3	4	3	3	3	3	3	2	3	4	3	3	3	3	4	3	3	2	3	3	4	3	3	3	4	106	4	3	3	3	3	2	3
2	4	3	2	2	0	0	0	3	4	4	4	3	3	3	3	3	4	3	3	3	4	4	4	4	3	4	3	4	3	4	3	4	4	4	2	4	3	4	3	4	3	118	1	2	3	2	2	2	3
2	4	2	1	3	0	1	0	1	3	3	3	3	3	3	3	3	4	4	3	2	3	4	3	3	3	2	3	4	4	3	3	2	2	3	2	3	3	3	3	3	3	100	2	3	2	3	2	2	2
1	4	3	1	1	1	0	0	3	3	3	4	4	2	5	4	4	3	3	4	3	4	4	3	4	4	3	4	3	4	3	3	3	4	3	3	4	3	3	4	4	3	118	2	3	3	2	2	3	2
2	4	1	1	3	0	0	0	3	2	3	2	2	3	3	3	3	3	3	4	2	2	3	3	1	4	3	2	3	3	2	2	2	2	3	2	3	2	3	3	3	3	90	2	2	2	3	3	3	3
1	4	2	1	2	0	1	0	2	3	4	2	3	2	2	2	3	3	3	3	3	3	3	2	2	2	3	3	3	3	2	2	3	3	2	2	3	3	2	2	3	3	89	3	2	3	2	2	2	3
2	4	3	2	2	1	0	0	2	3	2	2	2	3	3	3	2	2	1	3	3	1	2	3	4	3	3	3	3	2	3	3	3	2	3	1	4	3	2	3	2	3	87	2	2	3	3	2	2	2
1	4	2	1	2	0	0	1	2	3	4	2	2	4	3	3	3	3	2	3	3	4	2	3	2	3	3	3	3	3	3	3	3	3	4	3	3	3	4	3	3	3	101	2	2	2	2	1	2	2
1	4	3	2	2	0	0	0	4	3	3	3	2	3	3	3	3	3	3	3	3	3	2	3	3	3	4	3	3	3	3	4	3	3	3	4	2	3	3	2	3	4	103	2	2	2	1	1	2	2
1	4	2	2	2	0	1	0	3	3	3	3	2	3	3	3	3	2	3	2	3	2	3	3	3	4	3	3	2	3	3	3	3	3	3	3	3	3	3	3	2	2	96	2	2	3	1	2	1	1
2	4	1	1	2	0	0	1	3	3	3	2	4	3	2	3	2	2	2	3	3	3	4	3	3	3	3	3	2	3	3	2	3	2	3	3	3	2	4	3	2	2	94	2	2	2	2	3	2	2
2	4	1	2	2	1	0	1	4	3	4	3	3	3	3	3	3	2	3	3	4	3	4	3	3	3	3	2	3	3	3	3	3	3	3	4	2	2	3	3	3	2	102	3	3	3	3	3	3	3
1	4	2	2	1	1	0	0	3	2	1	2	3	3	3	3	2	2	3	2	1	2	3	2	2	2	3	2	2	3	3	2	2	2	2	3	2	3	2	3	2	3	80	3	2	2	3	3	3	3
2	4	3	2	2	0	0	1	3	3	3	4	3	4	3	3	3	3	3	3	3	3	3	3	4	3	4	3	3	2	3	2	3	2	4	4	3	2	3	3	4	3	105	3	3	3	3	2	3	3
2	4	3	2	2	0	0	0	3	4	3	3	3	3	3	3	3	4	4	3	3	3	3	2	3	3	4	2	3	4	2	3	3	3	3	3	3	3	4	3	4	3	106	2	2	2	1	1	2	0
1	4	2	2	2	0	0	0	2	3	2	1	3	2	2	3	3	2	2	3	2	3	3	3	3	2	3	3	3	2	3	2	3	3	2	3	2	3	2	2	1	3	84	3	3	4	2	3	4	3
2	4	1	2	2	0	0	0	3	4	3	3	3	5	3	4	3	4	4	4	3	2	3	4	3	4	3	3	3	3	4	4	3	4	4	3	3	4	3	3	4	4	117	2	2	2	2	2	1	3
1	4	3	1	1	1	1	0	3	4	3	3	3	3	2	4	3	3	3	2	3	2	3	3	3	3	4	4	3	3	3	4	2	2	3	3	3	3	2	3	3	3	101	2	2	1	2	1	2	1
2	4	2	1	2	1	1	0	2	2	2	3	3	3	3	2	3	2	3	2	3	3	3	2	2	3	3	3	3	3	3	4	3	3	2	3	3	3	3	3	2	3	93	2	1	2	2	2	2	2
2	4	3	1	2	1	0	0	4	3	3	3	2	3	3	3	2	3	3	3	2	3	3	4	3	3	3	3	4	3	3	3	3	3	3	3	3	3	3	3	3	2	101	3	2	2	2	2	3	2
1	4	3	2	2	0	0	1	3	2	3	4	3	3	3	3	3	2	3	2	3	3	2	2	3	2	3	2	3	2	3	3	3	4	3	3	3	3	4	3	3	2	96	2	3	2	2	1	2	3
1	4	1	1	1	0	1	1	3	3	3	4	4	4	3	3	4	4	4	3	3	3	4	3	3	3	4	3	3	3	3	2	3	3	3	3	4	4	3	3	3	3	111	1	1	2	2	1	2	1
2	4	2	1	1	1	0	1	2	4	2	3	3	4	3	3	4	4	3	3	3	3	3	3	3	3	4	4	3	3	3	3	4	3	3	3	4	3	3	4	3	3	109	2	1	2	2	1	2	2
2	4	1	2	2	1	0	1	3	3	2	3	2	4	3	3	3	3	2	3	2	4	2	2	3	3	3	3	3	2	3	3	3	1	3	3	3	3	1	3	4	3	94	3	3	4	3	3	3	3
2	4	1	1	2	0	0	0	3	3	3	3	3	3	3	3	4	3	4	3	2	3	2	4	4	3	3	3	3	3	3	3	3	4	3	4	4	2	3	4	3	4	108	3	2	3	3	2	3	3
2	4	3	2	2	0	0	0	3	3	2	3	4	4	3	3	3	2	3	3	2	3	3	4	3	3	3	4	2	4	3	3	4	3	4	2	3	2	3	3	3	3	103	2	2	2	1	2	2	2
2	4	1	2	2	1	1	0	2	2	2	3	2	3	3	4	2	2	2	3	2	2	3	3	2	3	3	3	3	3	2	2	3	3	3	2	2	2	3	2	3	2	86	2	2	3	2	3	3	2
2	4	2	2	1	0	0	0	2	2	2	3	4	3	3	3	2	3	2	3	3	3	3	3	2	3	3	3	3	3	3	2	3	2	2	2	3	4	3	3	3	2	93	3	3	3	3	1	2	2
2	4	1	2	1	0	0	0	2	2	3	4	2	3	2	2	3	2	2	3	3	3	2	3	2	2	4	2	3	3	3	3	3	2	3	3	3	3	2	4	3	3	92	3	3	4	4	4	3	3
1	4	1	2	2	0	0	0	3	3	3	3	3	2	3	2	2	4	2	3	3	3	4	3	2	3	2	2	3	2	4	2	3	3	3	3	2	4	3	3	3	3	96	3	3	2	2	3	3	3
2	4	2	2	2	0	1	0	4	4	3	3	3	2	2	3	2	2	3	4	3	3	3	3	2	3	3	3	3	2	2	3	2	3	3	4	3	3	4	3	2	3	98	2	3	4	3	3	3	3
2	4	3	2	1	0	0	1	3	3	4	3	3	4	2	3	3	3	3	2	3	2	2	3	3	3	2	3	3	2	2	2	3	2	2	2	3	3	3	2	3	3	92	2	2	1	2	2	1	2
2	4	1	2	2	0	0	1	3	4	3	4	3	3	3	3	4	3	2	3	3	4	3	3	5	3	3	3	4	3	3	4	3	3	3	3	3	3	3	4	3	3	110	2	2	1	3	2	1	3
2	4	3	2	3	0	0	0	3	2	2	1	4	2	3	2	3	3	3	3	3	2	2	2	3	2	2	2	3	2	2	4	1	3	3	2	2	2	2	2	2	3	82	3	3	3	3	3	2	2
2	4	1	2	3	0	0	0	3	4	3	3	2	4	3	2	3	3	3	2	2	3	3	3	3	3	3	2	3	3	4	3	3	4	4	2	3	2	4	2	4	2	100	2	2	3	3	3	2	2
2	4	3	2	2	0	0	0	2	2	3	2	2	3	4	3	3	2	3	3	3	2	3	2	2	3	2	2	3	3	3	2	2	3	2	3	4	3	2	3	3	3	90	2	2	2	3	2	3	3
2	4	2	1	1	0	1	0	2	3	2	3	3	3	4	3	4	3	2	3	3	2	2	3	2	2	4	3	1	2	1	3	2	2	3	2	3	2	3	3	3	3	89	3	3	3	3	2	4	3
2	4	2	2	2	0	1	0	3	2	3	3	3	3	3	3	2	3	3	3	3	3	3	3	3	2	3	3	3	3	3	3	3	4	3	3	2	2	3	3	3	2	97	1	1	2	1	0	1	1
1	4	1	1	3	1	0	0	2	3	3	2	2	2	3	2	3	3	2	2	3	3	2	3	3	3	3	3	3	2	3	2	3	4	2	3	3	2	3	3	3	3	91	4	3	3	4	3	4	3
2	4	2	2	2	1	0	0	3	3	3	3	2	3	3	3	3	3	3	2	2	3	2	3	3	3	3	3	3	3	3	2	3	3	3	3	3	2	3	3	3	2	95	0	1	2	0	0	1	1
1	4	1	1	1	1	0	1	2	2	3	3	3	3	3	2	4	3	4	3	3	3	3	3	4	3	2	2	2	3	3	2	3	3	4	3	3	2	3	3	3	2	97	4	4	4	4	4	4	4
2	4	1	2	1	1	0	1	3	3	3	4	3	2	3	3	2	2	2	3	3	3	3	2	2	3	2	2	2	3	3	3	2	3	3	3	2	2	3	3	2	2	89	2	2	2	2	2	2	1
2	4	3	2	2	0	0	0	4	3	4	4	3	4	4	4	3	2	4	3	3	3	3	3	3	3	3	4	3	3	3	4	4	4	3	3	3	3	3	3	3	3	112	2	1	2	2	1	2	1
2	4	1	1	1	0	1	0	3	3	2	3	2	2	4	2	1	3	2	3	3	4	4	3	3	3	3	3	2	3	3	3	2	3	3	3	2	3	3	3	3	2	94	2	2	2	2	2	2	2
2	4	2	1	3	0	0	1	3	3	3	2	2	3	2	3	3	2	2	3	4	3	2	3	2	3	2	3	3	3	2	2	2	3	2	2	2	2	3	2	3	3	87	3	2	2	3	2	3	3
2	3	1	2	2	0	0	1	4	3	3	4	3	3	4	3	3	4	3	3	3	3	3	3	3	3	4	3	3	3	3	3	4	3	2	3	3	2	4	3	3	3	107	2	3	2	2	2	2	3
2	2	3	2	3	0	1	1	4	3	4	3	3	2	3	3	3	3	3	2	2	3	4	3	3	3	3	3	2	3	3	3	4	3	3	3	3	4	3	2	4	3	103	3	3	2	2	2	3	2
2	1	2	1	2	1	0	1	3	3	3	2	3	3	2	2	2	3	3	4	3	3	2	3	4	3	3	3	3	3	3	3	3	3	3	3	3	3	3	3	3	3	99	3	3	4	3	3	3	4
2	3	2	2	2	1	0	1	3	3	3	3	3	3	3	3	2	2	3	3	3	2	2	2	3	4	3	2	3	4	2	3	3	3	3	2	2	3	2	3	3	2	93	2	1	2	2	3	2	2
2	1	3	1	1	0	0	0	2	3	3	2	3	3	3	3	3	3	4	4	3	4	4	2	3	4	3	3	3	3	3	3	3	3	4	3	3	3	3	3	3	4	106	3	3	3	3	4	4	4
2	3	1	1	1	0	0	0	3	3	2	2	3	3	3	2	3	2	2	3	3	3	3	2	3	3	3	3	2	2	3	2	3	3	3	2	2	3	2	3	3	3	90	3	3	4	3	4	4	4
2	4	1	1	1	0	0	0	3	3	4	2	3	3	4	3	2	3	3	2	2	3	3	3	3	3	3	3	2	3	2	3	3	3	2	2	3	2	3	2	3	4	95	2	2	2	2	3	3	2
2	1	3	2	1	0	0	0	3	2	3	2	3	2	3	3	2	2	3	3	1	3	4	2	2	4	2	3	2	3	2	3	2	2	2	3	3	2	3	3	2	3	87	3	3	3	3	3	3	3
2	3	1	1	1	0	1	0	3	3	3	2	2	2	3	3	3	2	2	3	3	2	2	3	1	2	3	3	3	2	3	3	3	2	3	2	2	2	3	2	2	3	85	2	1	2	1	1	1	0
2	2	3	2	1	0	0	1	3	3	3	2	2	2	3	3	3	3	4	3	3	3	3	3	3	3	3	3	2	4	3	3	3	2	3	2	3	3	3	3	3	3	98	2	3	3	3	2	3	3
2	3	1	1	1	1	1	1	3	4	3	3	2	3	3	3	3	3	3	3	3	2	4	3	4	3	3	4	3	5	3	3	3	3	3	4	2	4	2	3	3	2	105	1	2	1	0	1	1	0
2	3	3	1	1	0	0	0	3	2	3	2	3	2	3	2	2	3	2	3	3	3	3	2	3	2	3	2	3	3	2	3	3	3	2	2	3	3	3	4	2	3	90	1	1	1	1	1	0	1
2	3	3	2	1	0	0	0	3	3	3	3	3	3	1	3	2	3	2	4	3	3	4	3	3	3	3	3	3	2	3	2	3	3	3	2	3	4	3	3	3	3	98	3	2	3	3	2	2	3
2	2	1	2	1	0	0	0	4	1	2	3	3	3	3	2	3	3	3	3	3	3	3	2	3	3	3	2	3	4	3	2	3	3	3	3	2	2	3	3	2	3	94	4	3	2	3	3	3	3
1	2	3	1	1	0	0	0	2	2	2	4	2	3	3	4	3	2	3	3	3	3	3	2	3	3	2	3	3	3	4	1	3	2	3	2	2	2	3	3	2	3	91	3	3	3	2	2	3	2
1	2	3	1	1	0	0	0	2	3	2	3	4	3	4	3	3	4	3	3	3	3	3	2	3	2	2	3	2	3	3	2	3	3	3	3	3	4	3	3	3	3	99	3	2	2	2	2	2	3
1	2	2	1	1	0	0	0	5	2	4	4	4	3	3	3	4	3	4	3	4	3	4	5	3	4	5	4	4	3	4	3	3	4	3	3	3	4	4	4	4	3	123	1	1	1	1	1	1	2
1	1	2	1	1	0	0	0	3	3	3	3	3	3	2	3	2	3	2	4	3	3	4	3	3	2	2	2	3	4	3	2	1	3	2	3	3	2	3	2	3	3	93	2	3	3	2	4	3	4
1	3	3	2	1	0	0	0	2	3	3	3	3	3	2	3	3	3	2	3	2	3	3	3	2	2	2	2	2	2	3	3	3	2	2	3	3	3	3	2	3	2	88	2	2	3	2	2	1	2
1	2	2	1	1	0	0	0	2	2	2	3	2	1	1	2	2	2	3	3	2	2	3	2	3	2	3	2	2	2	2	2	2	2	3	2	2	2	2	2	3	3	75	3	2	2	3	1	3	3
1	3	2	1	1	0	0	0	3	3	3	2	4	3	2	3	3	3	3	3	2	3	3	3	3	4	2	3	3	3	4	3	3	3	4	4	3	3	3	4	3	4	105	2	3	1	0	2	1	2
1	3	3	2	1	0	0	0	2	3	3	3	3	3	3	3	4	3	4	2	2	3	2	3	3	3	3	3	4	3	3	3	3	3	2	2	3	2	3	4	3	3	99	3	2	3	2	2	3	3
1	4	1	2	1	0	1	0	3	3	3	3	2	2	2	2	3	2	3	3	2	3	3	2	2	2	3	3	2	3	3	3	3	2	3	3	2	2	3	2	3	2	87	2	2	3	3	2	2	2
1	2	1	2	1	1	1	0	3	2	3	4	4	3	2	2	4	3	3	3	2	3	3	4	3	3	2	3	2	4	3	3	3	3	4	3	3	3	3	3	4	3	103	3	3	1	3	2	2	3
1	4	1	1	1	0	0	1	3	3	3	2	3	3	4	4	2	3	3	3	3	3	2	3	2	3	3	3	2	1	3	2	3	3	2	2	3	3	3	3	2	2	92	3	2	2	2	2	2	2
1	3	2	1	1	0	0	1	3	3	3	3	3	4	2	2	2	2	3	3	3	3	4	3	3	3	3	3	3	4	3	3	3	3	4	3	2	3	3	3	3	3	101	3	2	3	3	3	3	3
1	3	1	1	1	0	0	1	3	2	1	2	1	1	2	2	2	3	2	2	2	2	2	1	3	2	3	2	1	3	1	2	3	2	2	2	2	2	2	3	2	2	69	3	2	2	2	2	2	2
1	3	1	2	1	0	0	1	4	2	4	3	3	2	4	3	3	4	3	3	3	3	3	3	3	3	2	3	3	3	2	2	3	3	2	4	4	3	3	4	3	3	103	2	3	3	2	2	2	2
1	1	2	1	1	0	1	1	3	3	4	3	2	3	3	3	3	4	3	2	2	3	3	4	3	3	2	2	4	3	3	3	3	3	2	3	3	3	3	3	4	4	102	3	3	3	3	3	2	3
1	4	2	1	1	1	0	1	3	3	3	4	3	3	3	3	2	3	2	3	3	3	4	3	3	3	2	3	3	3	2	3	3	4	3	3	2	3	4	3	4	4	103	2	2	2	2	2	2	1
1	2	3	1	1	0	0	0	2	2	2	3	3	2	2	2	3	4	2	2	3	2	3	2	2	3	3	3	3	4	2	3	3	3	2	3	3	2	3	3	2	2	88	2	2	2	2	2	2	2
1	2	2	1	1	0	0	0	3	3	4	3	3	4	3	2	3	2	4	4	3	3	3	2	2	4	3	3	3	2	4	4	3	3	2	3	3	3	3	4	3	3	104	2	3	2	2	2	3	2
1	2	2	1	1	0	0	0	2	2	3	2	3	3	3	4	3	4	3	2	2	3	2	3	3	3	2	2	3	2	3	3	3	3	4	3	3	3	2	3	3	3	95	2	2	2	3	2	3	3
1	1	2	1	1	0	0	0	4	3	3	3	4	3	2	4	3	4	3	3	2	3	4	3	3	3	3	3	3	2	3	3	3	3	3	3	3	3	3	3	3	3	104	2	2	2	2	3	3	3
1	2	3	2	1	0	1	0	2	2	2	2	3	3	3	2	3	3	3	4	3	3	3	3	2	2	2	2	3	3	2	3	3	3	4	3	3	3	3	2	3	2	92	1	2	1	1	1	0	1
1	3	2	2	1	0	1	0	4	3	2	3	3	3	3	4	3	3	3	4	3	3	2	3	4	3	3	3	3	4	3	3	3	3	3	2	3	3	3	4	2	3	104	3	2	2	3	3	3	4
1	4	1	1	1	0	1	0	2	3	2	3	3	2	2	3	3	3	3	2	3	4	2	3	3	3	3	3	3	2	3	3	2	2	4	3	3	3	3	2	4	3	95	3	3	3	3	3	3	3
1	3	1	1	1	0	1	0	3	3	3	3	3	2	3	3	3	3	3	4	2	2	3	3	2	3	2	3	3	3	3	3	2	3	3	2	2	3	2	2	2	3	92	2	2	3	3	2	2	2
1	2	1	2	1	0	1	0	3	3	2	3	3	3	3	2	3	3	2	3	3	3	2	2	3	2	3	2	3	2	3	4	3	3	4	3	2	3	3	3	3	2	94	3	3	3	3	2	4	3
1	4	2	2	1	1	1	0	3	4	4	3	3	2	3	3	3	4	4	2	3	4	4	3	3	3	3	3	3	2	3	4	3	3	3	2	3	3	3	3	3	4	106	2	4	3	2	3	4	2
1	2	1	1	1	0	0	1	3	2	2	3	3	3	3	3	2	2	3	3	3	3	3	1	2	3	3	4	4	3	2	4	3	3	3	2	3	2	3	2	3	3	94	4	4	4	4	3	4	4
1	3	1	1	1	0	0	1	4	3	3	3	4	4	3	4	4	4	3	4	3	3	4	4	4	3	2	3	4	4	3	4	4	4	3	4	4	3	3	4	4	3	120	3	3	3	3	2	3	2
1	2	2	1	1	0	1	1	3	3	3	3	3	3	3	3	3	3	4	3	3	3	3	4	3	4	3	3	3	3	3	3	3	3	4	2	3	3	3	3	2	2	103	3	2	2	3	4	3	2
2	1	3	2	1	1	0	1	3	3	3	3	3	3	3	3	2	3	3	2	3	3	3	3	2	2	2	3	4	3	3	3	3	3	3	4	3	2	3	3	4	3	99	2	2	2	2	2	3	3
2	3	2	2	1	1	0	1	3	3	3	2	4	4	3	3	2	3	2	3	3	3	2	3	3	2	3	3	3	3	3	4	3	2	4	3	2	3	3	3	3	3	99	3	2	2	3	3	2	3
2	2	2	1	1	0	0	0	2	2	2	2	3	2	3	3	2	3	3	2	3	2	3	2	2	2	3	2	2	2	3	2	4	3	2	3	2	2	3	3	2	3	84	1	2	2	2	2	3	3
2	4	1	1	1	0	0	0	2	3	3	2	2	4	2	2	3	3	2	2	3	3	2	4	2	3	3	2	3	2	3	4	2	3	4	3	3	3	3	3	3	2	93	2	3	2	2	2	2	3
2	2	2	1	1	0	0	0	2	2	2	2	2	2	3	2	2	1	2	2	3	3	3	2	2	2	3	3	2	2	2	2	2	3	2	3	1	2	2	2	2	2	74	2	2	2	2	3	3	2
2	2	2	1	1	0	0	0	3	4	3	3	2	2	3	3	4	3	3	2	2	2	3	2	3	3	3	3	2	3	3	2	3	3	2	3	3	3	3	3	3	3	95	1	1	1	2	1	1	1
2	2	3	2	1	0	0	0	3	3	3	3	2	3	3	2	3	3	3	3	4	3	4	3	3	4	3	3	3	3	3	3	3	3	3	3	4	3	3	3	4	3	105	0	0	1	1	1	1	0
2	4	2	2	1	0	1	0	3	3	3	2	3	3	2	3	3	3	2	3	4	3	3	4	3	3	2	3	3	3	4	3	3	2	3	3	2	3	2	2	3	3	97	2	2	1	1	2	3	2
2	3	3	2	1	0	1	0	3	2	2	3	2	3	4	3	3	2	3	3	4	2	3	2	3	3	3	3	3	2	2	3	3	3	3	3	3	2	2	3	3	2	93	3	2	3	3	2	2	2
2	1	1	2	1	0	1	0	3	3	3	3	3	3	3	3	2	3	3	2	3	4	4	3	3	3	3	3	2	3	3	3	3	3	3	3	3	2	3	2	3	3	99	1	1	1	1	0	1	1
2	2	3	1	1	1	0	0	3	3	3	3	3	3	2	3	3	3	3	2	3	3	2	3	4	3	4	2	3	3	3	4	2	3	3	3	2	3	2	2	3	2	96	2	2	1	1	1	1	1
2	1	3	2	1	1	0	0	4	3	3	4	2	3	3	4	3	3	3	2	3	3	3	3	3	3	3	3	3	3	3	3	2	3	3	3	2	2	3	4	3	4	102	1	1	1	1	1	1	1
2	1	2	2	1	1	0	0	3	4	3	3	3	4	4	4	4	3	3	4	3	4	3	4	3	4	4	3	4	4	2	3	3	4	4	3	4	3	3	3	4	4	118	2	2	1	2	1	3	2
2	2	1	2	1	1	0	0	3	3	2	3	2	2	3	4	3	3	3	3	2	3	2	3	2	2	2	3	2	2	3	3	3	3	2	2	2	4	3	2	2	4	90	2	4	4	3	2	3	3
2	1	1	2	1	0	0	1	3	2	3	3	3	3	3	3	2	3	3	2	3	3	3	3	2	2	2	2	3	4	3	3	3	3	3	3	3	3	3	3	2	3	95	3	2	3	3	3	3	3
2	2	1	2	1	0	1	1	3	3	3	2	3	3	3	3	3	3	3	3	2	3	3	2	2	2	3	4	4	3	3	2	2	2	2	2	2	2	3	3	3	3	92	2	3	3	2	2	2	2
2	4	3	2	1	0	1	1	2	3	3	3	2	2	2	3	3	3	2	2	3	3	3	3	3	2	2	3	3	2	3	2	3	3	3	2	3	3	2	3	3	2	89	3	3	2	4	3	3	4
2	1	3	2	1	0	1	1	2	3	2	2	3	2	2	2	2	3	2	3	2	1	2	2	2	2	2	2	2	2	2	2	2	1	3	2	2	2	2	2	2	1	70	3	3	3	2	2	2	2
2	1	1	1	1	1	0	1	2	3	3	2	3	2	3	3	3	3	2	3	3	3	2	3	3	4	4	3	4	3	3	3	4	3	4	3	3	3	3	3	2	3	101	2	1	2	2	2	1	2
2	4	3	2	1	0	0	0	3	3	3	3	3	3	2	3	3	3	3	3	3	3	4	3	3	2	3	3	2	3	3	3	3	3	3	3	2	3	3	3	2	2	97	3	3	2	3	4	3	3
2	1	2	1	2	0	0	0	2	3	2	2	3	3	2	3	2	2	2	3	2	2	3	2	2	3	3	2	2	2	2	3	2	2	2	3	2	1	2	3	3	2	79	4	3	3	3	2	2	3
2	3	1	2	3	0	1	0	3	3	2	1	2	3	2	3	3	3	2	3	3	3	2	3	3	2	2	3	3	3	2	3	2	3	3	3	3	3	3	3	3	3	91	2	2	2	3	2	3	1
2	4	2	1	2	0	1	0	2	2	2	2	3	2	2	2	2	2	2	3	4	2	2	2	3	3	2	3	2	1	2	3	2	2	1	3	3	3	3	2	2	2	78	2	3	2	3	3	2	3
2	1	3	2	2	0	1	0	2	3	3	4	3	4	3	4	4	4	4	3	4	2	3	4	3	3	3	4	3	3	4	4	4	4	3	3	3	3	3	3	4	3	114	3	2	2	2	3	2	3
2	1	3	1	1	1	0	0	4	3	3	3	3	3	3	3	3	3	3	2	3	3	3	3	3	3	3	3	3	3	4	2	2	3	2	2	3	3	3	4	4	4	102	0	1	2	2	2	2	2
2	3	2	1	1	1	0	0	3	3	2	3	2	3	2	3	3	2	3	3	2	3	3	2	2	2	2	3	3	3	2	3	3	3	2	2	2	3	3	2	3	3	88	3	3	3	3	4	3	4
2	3	1	2	3	1	1	0	2	3	2	4	3	3	2	3	2	3	3	4	2	4	3	3	3	3	3	4	3	3	4	3	4	3	3	4	2	3	3	3	4	3	104	2	2	2	3	3	1	2
2	3	1	2	3	1	0	1	4	3	3	2	3	4	3	2	2	3	3	4	4	3	4	3	3	3	2	3	2	3	4	3	2	3	3	3	3	4	3	4	3	3	104	3	2	3	3	3	3	3
2	2	1	1	2	1	1	1	2	3	3	2	3	2	3	3	3	2	3	3	2	2	2	4	3	3	2	2	3	2	4	2	3	3	3	3	3	2	3	3	2	3	91	2	2	2	2	2	2	2
2	4	1	2	2	1	1	1	2	2	2	2	3	3	3	3	3	2	3	3	2	3	4	4	3	2	3	3	2	3	3	3	2	1	2	3	2	2	3	3	3	2	89	2	2	2	2	2	2	2
2	4	1	1	1	0	0	0	3	3	3	3	3	3	3	3	3	3	3	2	3	3	2	3	3	3	4	3	3	3	2	3	3	3	2	2	3	3	2	3	3	4	98	2	2	2	1	2	2	1
2	4	3	2	1	0	0	0	3	3	3	3	3	3	2	2	3	3	3	3	3	2	2	3	3	3	3	3	3	2	3	2	3	3	3	2	3	3	2	2	3	3	93	2	2	2	3	1	2	0
2	4	1	2	2	0	0	0	3	3	3	4	3	3	3	4	2	3	4	3	3	3	2	2	3	4	2	4	4	3	4	4	4	4	3	3	2	2	3	3	4	3	107	1	2	2	1	1	2	1
2	2	1	2	3	1	0	0	3	3	2	2	3	3	3	3	3	3	3	4	3	3	2	3	3	4	3	3	3	3	3	3	3	2	2	3	2	4	4	2	3	3	99	3	3	3	2	2	3	4
2	3	1	2	2	1	0	0	3	2	2	3	2	3	3	3	3	2	3	3	3	2	3	2	3	3	3	3	2	4	3	2	3	3	3	3	3	2	4	3	3	3	95	2	2	2	2	2	1	3
2	2	2	2	3	1	1	0	2	3	2	3	3	3	2	3	3	4	3	3	3	2	3	4	3	3	4	3	3	2	2	2	2	2	3	3	3	3	3	4	4	3	98	3	3	4	3	3	4	3
2	2	2	2	1	0	0	1	3	3	3	3	3	3	3	2	3	2	2	3	3	3	3	3	2	2	3	3	2	2	4	3	2	3	2	3	3	3	3	2	3	2	92	4	3	4	4	3	4	4
2	1	3	1	3	0	0	1	3	2	2	3	3	3	2	2	3	3	3	3	3	2	3	3	3	3	3	3	3	2	3	3	3	3	4	3	4	3	2	3	3	3	97	2	2	2	2	1	2	2
2	3	2	1	3	0	0	1	2	3	2	3	3	2	2	3	2	3	3	3	2	3	3	4	3	2	4	3	2	3	3	4	3	4	2	3	3	3	3	3	3	4	98	2	2	1	2	2	0	3
2	1	1	1	2	0	0	1	4	3	2	4	4	4	3	3	3	2	4	3	3	3	4	3	3	3	4	3	3	3	3	3	4	3	2	3	4	3	3	2	2	4	107	2	2	1	1	1	2	2
2	4	2	2	2	0	0	1	3	2	3	3	2	2	2	3	2	3	2	2	3	3	3	3	2	2	3	3	3	3	2	1	3	3	3	2	2	3	2	2	2	3	85	3	2	2	2	3	1	4
2	3	3	2	2	1	1	1	2	2	3	3	3	3	3	3	2	3	3	2	3	3	2	3	3	3	3	3	3	2	2	3	2	3	3	2	2	3	2	2	3	2	89	3	3	3	2	3	2	2
2	4	1	2	1	0	0	0	3	2	3	2	3	3	2	3	3	3	3	3	2	2	3	2	3	3	2	2	3	3	3	3	2	3	3	3	3	3	3	3	3	3	93	2	3	2	2	2	2	2
2	2	2	1	3	0	0	0	2	3	3	4	3	3	2	2	2	3	3	3	2	3	2	3	2	4	3	3	2	3	2	3	3	3	3	2	2	2	3	3	3	4	93	3	3	2	2	3	3	3
2	3	3	2	3	0	0	0	4	3	4	3	3	3	3	3	3	4	4	3	3	3	4	3	2	3	4	3	3	3	3	3	3	3	3	3	3	3	3	4	4	3	109	2	2	4	3	1	2	3
2	4	2	1	2	0	0	0	2	3	3	3	2	3	2	3	3	3	3	2	3	3	3	3	3	2	2	3	2	3	2	4	3	2	2	2	3	3	2	3	3	3	91	4	4	3	4	4	4	4
2	4	1	1	2	0	0	0	3	2	2	2	3	2	3	2	3	3	3	3	3	3	3	2	3	3	3	2	3	3	3	2	2	3	2	3	3	3	3	3	3	3	92	3	2	3	3	2	3	3
2	3	2	2	2	0	0	0	3	3	3	3	3	3	4	4	3	2	3	2	4	3	3	3	4	2	3	2	3	3	3	3	3	3	3	3	3	3	2	2	3	3	100	3	3	3	3	4	3	4
2	3	1	2	2	0	1	0	2	2	3	2	3	2	3	3	3	3	3	3	2	3	3	3	3	3	2	2	3	3	3	3	2	2	2	2	3	3	3	2	2	2	88	3	3	2	3	3	2	3
2	3	3	2	2	0	0	1	3	3	3	2	2	3	3	3	2	3	3	2	3	2	2	4	3	2	4	3	2	4	2	2	2	2	3	3	2	3	2	2	3	3	90	3	3	3	3	2	3	3
2	2	2	2	2	0	0	1	3	4	3	4	4	2	3	4	4	4	3	3	5	3	3	4	3	3	4	4	3	3	2	3	3	3	3	3	4	3	3	4	3	3	113	3	2	3	2	1	2	2
2	1	2	1	1	0	1	1	2	2	4	3	3	3	3	4	3	2	3	2	3	2	2	3	3	2	3	2	2	3	3	3	2	3	3	3	3	3	3	3	3	3	94	2	1	2	2	2	1	1
2	2	3	1	1	1	0	1	3	3	3	2	3	3	3	3	2	3	3	3	3	3	3	2	3	3	3	3	3	3	2	3	3	2	2	2	2	3	2	1	3	2	90	2	2	2	2	3	3	2
2	4	1	2	3	1	0	1	2	4	3	3	2	2	3	2	3	3	3	3	3	3	2	3	3	3	3	3	5	2	3	3	3	3	3	3	3	2	3	2	3	2	96	1	1	1	1	1	2	2
2	4	3	2	1	0	0	0	3	2	3	3	1	3	2	3	2	2	2	2	2	2	2	2	2	3	2	3	2	2	2	4	3	3	3	2	3	3	2	2	3	2	82	4	3	4	3	4	3	4
2	2	1	2	1	0	0	0	3	4	2	3	4	3	3	3	4	3	3	3	3	3	3	3	3	3	3	3	3	2	3	2	3	3	2	4	3	2	2	2	3	3	99	2	3	1	2	1	2	2
2	2	1	2	3	0	0	0	3	3	3	3	3	3	4	3	3	3	4	3	2	3	3	3	3	4	3	3	3	3	3	3	3	3	3	3	3	2	4	4	3	3	105	1	2	2	2	2	3	2
2	2	2	2	2	0	0	0	3	4	4	3	3	3	3	4	4	4	2	4	4	3	3	3	2	3	4	3	3	3	4	3	2	3	4	3	3	4	4	4	3	3	112	3	1	2	3	3	2	2
2	1	1	1	1	0	1	0	3	4	4	3	2	2	4	3	3	3	3	3	3	3	3	2	2	3	3	3	2	2	3	4	4	4	3	4	4	2	4	3	3	3	104	2	2	3	2	2	2	3
2	4	3	2	1	0	1	0	3	3	3	3	3	4	2	3	2	3	3	3	3	3	3	4	3	3	3	3	4	3	3	3	3	3	3	3	3	3	3	3	4	3	104	2	3	2	3	1	3	2
2	4	1	2	1	0	1	0	2	3	1	3	3	2	3	3	2	2	3	3	3	3	2	3	2	3	3	2	3	3	3	2	3	2	2	3	3	3	2	3	2	2	87	3	3	4	3	3	3	3
2	1	2	2	3	0	1	0	2	2	2	3	2	2	2	3	3	3	2	2	2	3	2	2	3	2	1	2	3	2	3	2	3	2	2	1	2	2	3	3	3	2	78	2	3	3	3	2	3	2
2	2	1	1	2	0	1	0	4	3	4	3	3	4	4	3	3	3	3	4	3	4	4	2	3	4	4	5	3	3	4	4	4	4	3	3	3	4	4	3	4	4	120	2	2	2	2	1	2	2
2	2	1	2	2	0	1	0	2	2	2	2	2	2	3	3	2	3	3	3	3	2	3	2	3	3	3	3	3	2	2	4	3	2	2	2	3	2	2	3	1	2	84	3	3	3	2	3	3	3
2	1	3	2	1	1	0	0	3	2	3	3	3	4	3	2	2	3	3	3	3	3	3	2	4	3	4	2	3	3	3	2	3	3	3	3	3	2	3	2	2	3	96	2	2	2	1	2	2	2
2	2	1	2	3	1	0	0	2	2	2	3	3	2	2	2	2	1	2	1	2	3	2	3	2	2	2	3	2	2	2	2	2	3	2	3	3	2	2	2	2	3	75	3	3	4	3	4	3	4
2	4	2	1	2	1	0	0	2	1	2	3	2	2	2	1	2	2	3	2	2	2	3	3	2	2	2	3	4	2	2	2	2	2	2	3	2	3	3	2	2	2	76	4	3	3	2	3	3	3
2	2	1	2	2	1	0	0	2	2	2	3	2	2	3	2	2	2	3	2	2	2	2	3	1	2	2	3	3	3	3	2	2	3	2	3	3	2	2	3	3	2	80	2	2	2	2	2	2	4
2	1	2	2	1	1	1	0	2	2	2	3	3	3	2	3	3	3	3	3	3	3	3	3	4	2	3	3	3	4	2	2	2	3	2	2	3	3	2	4	2	3	93	3	2	2	3	3	3	2
2	1	2	1	3	1	1	0	2	2	3	3	3	3	3	3	2	2	2	3	3	2	4	2	2	3	3	2	2	2	3	3	3	3	3	3	3	3	3	2	3	3	91	2	3	2	2	3	3	2
2	2	1	2	1	0	0	1	3	3	3	4	4	2	3	3	3	2	3	3	2	4	3	2	3	2	3	3	3	3	3	3	3	2	3	2	3	3	3	4	4	3	100	3	3	3	2	3	2	3
2	1	1	2	3	0	0	1	2	2	2	3	2	3	2	2	2	2	3	3	2	2	3	2	2	2	3	2	2	3	3	3	2	2	2	2	2	2	2	3	2	2	78	2	3	2	3	2	3	4
2	2	3	1	1	0	0	0	2	4	3	3	2	3	2	3	3	3	3	3	3	3	3	3	2	3	3	2	3	3	3	3	3	3	2	3	3	2	3	3	3	2	95	2	2	3	2	2	2	3
2	2	1	1	1	0	0	0	3	3	3	2	3	3	3	2	2	2	2	2	3	2	3	3	3	2	2	3	3	3	3	3	1	3	3	2	3	2	2	3	2	2	86	4	3	3	2	3	3	4
2	1	2	2	1	0	0	0	2	2	2	2	2	1	2	2	2	2	2	3	2	2	2	2	2	2	3	2	3	2	2	2	2	2	2	2	3	2	2	3	1	2	71	4	4	4	3	4	4	4
2	2	1	2	1	0	0	0	4	2	2	3	2	2	3	3	2	2	2	1	2	2	1	2	3	2	3	2	2	2	3	2	2	3	2	2	2	3	2	2	3	3	78	2	2	2	2	2	2	2
2	3	3	2	2	0	0	0	2	2	3	2	3	3	2	3	2	3	3	3	2	1	3	2	3	3	3	3	2	4	3	2	3	3	2	2	3	3	2	3	2	3	88	3	3	3	3	3	3	3
2	4	3	1	1	0	1	0	4	4	2	3	3	2	2	3	4	3	3	3	3	3	3	3	2	3	3	3	2	2	3	3	3	3	4	3	3	3	2	2	3	3	98	2	1	2	3	3	3	2
2	4	2	2	1	0	1	0	3	3	3	3	3	3	4	4	4	3	3	4	3	3	3	3	3	3	3	3	3	4	3	2	4	3	3	4	4	3	2	3	3	4	109	2	2	1	1	2	2	3
2	1	3	1	2	0	1	0	4	2	4	4	3	3	3	3	3	3	4	3	3	3	2	3	3	2	3	4	3	4	3	3	4	3	3	3	4	3	4	4	3	4	110	2	3	4	4	3	4	3
2	2	1	1	2	0	1	0	2	3	3	3	2	2	3	1	2	1	1	2	2	2	3	2	2	2	2	2	2	2	2	2	2	2	2	3	2	2	2	3	2	3	73	3	2	1	1	2	2	2
2	4	2	2	1	1	0	0	2	3	3	3	3	2	2	4	2	3	3	2	2	2	2	3	3	3	3	2	3	3	2	3	2	2	2	2	3	2	3	4	3	3	89	2	4	4	4	4	3	4
2	2	3	1	3	1	0	0	2	3	2	2	3	2	2	2	2	2	4	2	3	2	3	2	2	2	2	2	1	2	3	2	2	2	3	2	3	2	3	3	2	3	79	2	3	2	2	2	3	2
2	1	1	2	2	1	0	0	3	3	4	2	2	3	2	3	3	2	3	2	3	2	2	4	3	3	3	2	3	3	2	2	2	3	3	3	2	3	3	2	4	2	91	3	3	2	2	2	2	2
2	4	2	1	2	1	1	0	3	4	3	3	3	2	3	3	3	2	3	4	4	4	3	3	3	4	4	3	3	3	2	4	3	3	3	3	3	3	2	3	3	3	105	3	3	2	2	1	2	1
2	3	3	1	2	0	0	1	3	2	3	2	4	3	3	3	3	3	3	3	3	2	4	3	3	3	3	3	2	3	2	3	3	3	2	3	3	3	2	2	2	3	95	3	2	3	3	4	3	3
2	3	2	1	1	0	1	1	2	3	3	3	3	3	3	3	3	3	3	3	4	3	3	3	3	3	3	2	2	3	3	2	4	3	3	2	3	3	4	3	3	2	99	3	3	2	4	3	3	4
2	4	1	2	2	0	1	1	3	4	4	3	3	4	4	3	4	3	4	3	3	3	3	4	3	3	3	3	3	4	3	3	3	3	3	3	3	3	2	3	3	4	110	0	2	2	1	2	2	2
2	2	2	1	1	1	0	1	2	3	3	3	3	3	3	2	3	2	2	3	2	2	3	2	2	3	4	3	2	2	2	2	3	2	2	2	3	3	2	3	3	3	87	4	2	2	3	2	3	2
2	2	1	2	3	0	0	0	4	4	4	4	3	5	3	3	3	4	3	3	3	3	3	4	4	3	3	3	3	3	4	3	4	3	4	3	3	3	2	3	4	3	114	1	2	1	2	2	2	2
2	1	2	2	2	0	0	0	2	3	4	3	3	3	3	2	3	2	3	3	3	3	2	3	3	3	2	2	3	2	2	2	3	2	2	3	2	2	2	2	3	3	88	3	2	2	3	3	3	3
2	3	1	2	2	0	0	0	2	3	3	3	2	3	2	2	3	3	3	2	3	3	3	3	2	3	3	3	3	3	2	2	2	3	4	3	2	3	3	2	3	3	92	2	2	3	1	2	3	2
2	3	2	2	1	0	1	0	3	4	2	3	3	3	3	3	3	3	3	2	2	3	3	2	3	2	2	3	3	4	3	2	3	3	3	2	3	3	3	4	3	3	97	3	2	3	3	2	2	3
2	1	3	1	2	0	1	0	3	2	2	2	2	2	2	2	2	3	2	2	3	2	4	3	2	3	3	3	3	3	2	2	3	3	3	2	3	1	3	2	2	3	84	3	3	3	3	3	3	2
2	4	2	1	1	1	0	0	3	2	3	3	3	3	2	3	3	2	2	4	2	3	2	2	1	3	2	3	2	2	2	3	3	2	4	3	2	2	3	3	4	2	88	2	3	3	3	3	2	3
2	3	1	1	1	1	0	0	3	3	4	4	3	2	3	3	3	3	3	3	3	3	3	3	3	2	2	3	3	3	3	3	4	2	3	3	4	4	3	3	2	2	101	3	2	2	2	2	1	1
2	3	1	2	3	1	0	0	2	3	2	3	2	2	2	2	2	3	3	2	3	3	2	2	3	2	2	2	3	2	3	2	3	2	2	3	2	3	2	3	2	2	81	3	4	4	3	3	3	3
2	1	2	1	2	1	0	0	4	3	3	2	3	3	2	3	4	2	2	3	3	3	3	3	3	3	3	3	3	2	2	3	3	3	3	3	3	2	2	3	3	3	96	2	2	3	2	4	2	3
2	4	1	2	2	1	0	0	4	2	3	2	3	3	3	3	3	3	3	3	3	2	3	3	2	2	3	2	3	3	2	4	3	4	2	2	2	2	3	3	3	3	94	2	2	3	2	3	2	2
2	2	1	1	1	1	1	0	3	3	2	3	2	4	3	2	2	3	2	3	2	3	2	2	2	2	2	3	3	3	2	3	3	3	3	3	2	3	3	2	2	2	87	2	1	2	2	2	1	1
2	3	1	1	1	1	1	0	3	4	3	4	4	4	2	4	4	4	3	2	4	3	4	2	4	4	4	2	4	3	2	2	3	3	2	3	4	4	3	4	3	3	111	4	3	4	3	3	3	4
2	1	2	2	1	1	1	0	3	2	3	3	4	3	3	3	2	3	2	3	2	3	3	3	2	2	3	3	2	2	3	3	3	3	3	3	3	2	3	3	3	3	94	3	2	3	2	2	1	2
2	2	1	1	2	0	0	1	3	2	2	3	3	2	3	3	2	3	3	3	2	3	3	3	3	2	2	3	3	3	2	2	2	2	2	3	2	3	2	2	3	2	86	3	3	3	3	3	2	3
2	3	1	2	2	0	1	1	3	3	3	3	3	3	3	4	3	4	4	4	3	3	3	3	3	3	4	3	4	4	3	3	4	4	3	2	3	3	3	4	3	3	111	1	2	2	2	2	2	1
1	1	1	2	2	0	1	1	3	3	3	2	3	3	4	4	4	3	4	4	3	3	3	3	3	3	3	3	3	3	4	4	3	3	3	4	3	3	2	3	3	4	109	1	1	2	2	2	1	1
1	2	1	1	3	0	0	0	3	4	3	3	3	4	3	2	4	3	3	3	3	3	4	3	4	4	2	4	4	4	4	4	3	3	3	4	4	3	3	3	3	3	113	3	1	3	2	1	2	1
2	1	1	1	3	0	0	0	2	2	2	2	3	1	3	2	2	2	3	2	2	2	2	2	3	3	2	2	3	3	3	3	2	2	2	2	3	3	2	3	2	4	81	4	4	4	4	3	3	3
2	1	2	2	3	0	0	0	2	3	2	1	2	2	3	3	1	3	3	2	3	4	2	3	3	3	4	2	3	4	2	3	1	2	3	2	2	2	2	3	3	3	86	1	1	3	2	1	3	1
2	1	3	1	2	0	0	0	3	3	4	2	3	2	2	3	3	3	3	3	3	3	3	3	3	3	2	2	3	2	2	3	2	2	2	2	3	3	3	2	3	3	91	3	2	3	3	2	2	2
2	3	3	2	2	0	0	0	2	2	2	3	3	4	3	3	3	3	2	4	3	3	3	3	3	3	3	3	4	3	3	3	3	3	2	2	3	3	3	2	3	3	98	2	2	2	2	3	3	2
2	2	2	2	2	0	0	0	2	3	3	2	3	3	3	3	3	3	3	3	4	3	2	3	2	3	3	4	3	3	3	3	3	2	3	3	2	3	3	4	3	3	99	2	2	2	3	2	2	3
2	2	1	2	2	1	0	0	2	3	2	3	3	2	2	3	2	3	2	3	2	3	2	2	1	3	2	4	3	3	2	2	2	2	2	2	3	2	3	2	2	2	81	4	4	4	4	4	4	4
1	4	3	1	2	1	1	0	2	2	2	4	2	3	3	2	1	2	3	3	2	2	2	2	3	3	2	2	2	1	3	3	2	2	2	2	2	2	2	2	3	2	77	3	2	4	3	3	2	2
2	3	3	2	2	1	1	0	3	2	1	2	3	3	2	2	2	3	2	3	2	3	2	3	2	2	3	2	3	2	2	3	2	3	2	2	3	3	2	3	3	3	83	3	3	2	3	2	3	3
2	1	3	1	1	0	0	1	4	3	2	3	3	3	3	3	3	2	3	3	3	3	2	3	3	3	3	3	2	3	3	3	3	2	2	3	3	3	2	3	2	1	93	2	2	2	2	3	2	1
1	2	1	2	3	0	0	1	3	3	3	2	3	3	3	2	3	3	2	1	2	3	3	3	3	2	3	3	2	2	2	2	2	2	2	2	2	2	3	2	2	2	82	2	2	2	1	2	2	1
1	3	1	1	2	0	0	1	4	2	3	3	3	4	2	3	4	3	2	2	2	2	2	3	2	3	2	3	3	2	3	2	2	3	3	3	2	2	3	2	3	3	90	2	4	2	2	2	3	3
1	1	3	1	1	0	1	1	4	3	3	3	3	1	3	3	3	3	3	4	3	2	2	2	2	3	3	3	2	3	2	2	3	3	2	3	2	3	3	3	2	2	91	2	3	3	2	3	3	2
1	2	2	1	1	0	1	1	2	3	2	3	3	2	3	2	3	4	3	2	3	2	3	3	2	3	3	3	4	3	3	2	2	3	3	3	4	2	3	2	3	2	93	2	3	3	3	3	3	2
1	2	2	1	1	0	1	1	2	3	3	3	3	3	3	3	3	3	3	3	3	2	3	3	3	2	3	2	3	2	2	3	3	3	3	3	3	3	3	3	3	3	96	3	3	3	3	4	3	3
2	1	1	2	1	0	1	1	3	3	4	2	2	3	3	2	2	4	2	3	3	2	4	3	2	2	2	2	4	3	3	3	3	2	3	2	3	2	3	3	3	2	92	2	2	2	3	2	3	3
1	2	3	2	2	0	1	1	3	3	3	3	4	3	4	3	3	3	3	3	4	3	4	4	3	3	2	3	3	3	3	3	3	3	3	4	3	4	3	3	3	4	109	2	3	2	1	2	2	1
1	3	2	2	2	0	1	1	3	2	3	3	2	2	3	2	2	3	3	3	3	3	2	2	3	3	2	2	3	3	3	3	3	2	3	3	2	3	3	3	3	2	90	2	2	2	1	2	2	2
2	4	1	1	1	1	0	1	3	3	3	3	3	3	3	4	3	2	3	3	2	3	3	2	2	3	3	3	3	2	2	3	3	3	2	2	3	2	2	3	3	3	93	2	3	3	2	3	3	3
2	4	2	2	1	1	0	1	3	3	3	3	2	2	3	2	3	3	3	3	3	3	2	3	2	3	3	3	3	3	2	3	3	3	4	3	3	3	3	3	3	3	97	3	4	4	4	4	4	4
1	4	1	2	2	1	1	1	3	3	3	3	2	3	3	3	3	3	3	3	2	3	2	3	3	3	4	3	2	2	3	3	2	2	2	2	3	3	3	3	4	2	94	3	3	2	4	3	3	3
1	2	1	1	1	0	0	0	3	2	2	3	3	2	2	3	3	2	4	4	4	3	3	3	3	3	3	3	4	2	3	3	2	3	3	3	3	3	3	4	2	3	99	3	3	2	3	2	2	1
2	4	3	2	1	0	0	0	3	3	4	3	4	3	3	3	3	2	3	3	3	3	3	3	3	2	2	2	3	3	3	3	3	2	3	2	3	3	3	3	3	3	98	3	3	1	1	2	2	3
2	3	2	2	1	0	0	0	3	3	3	3	3	3	2	3	3	3	3	3	4	3	4	3	3	2	3	4	3	3	3	2	3	3	3	2	3	4	2	3	3	3	101	2	2	2	2	2	2	2
2	1	2	2	1	0	0	0	4	3	3	4	3	3	3	3	3	3	2	2	3	3	3	2	3	3	3	3	3	3	3	3	3	3	3	4	4	2	2	2	3	2	99	2	2	2	2	2	2	2
2	4	1	2	1	0	0	0	4	3	4	3	3	3	3	3	4	2	4	3	4	2	3	4	3	3	3	2	3	2	4	3	4	4	3	3	3	4	3	2	3	3	107	2	1	3	2	1	2	3
2	1	1	1	3	0	0	0	3	2	4	3	3	3	3	3	3	3	4	3	4	2	3	4	3	3	4	3	2	2	4	3	4	4	2	3	3	2	3	4	3	3	105	2	2	2	1	2	1	2
2	4	1	2	3	0	0	0	3	2	3	3	2	3	2	4	3	3	3	3	3	2	3	2	3	3	3	3	3	2	3	3	3	3	3	3	3	2	2	3	3	3	95	3	3	2	2	2	3	2
2	3	2	1	2	0	0	0	4	3	3	3	3	2	3	2	3	3	3	3	2	2	3	2	3	2	2	3	4	3	2	2	3	3	3	3	2	2	3	3	4	3	94	3	3	2	2	3	3	2
1	3	3	2	2	0	0	0	2	3	2	4	3	2	3	3	2	2	3	3	3	2	3	3	4	3	3	2	2	2	3	2	1	2	3	3	3	2	3	2	4	2	89	2	3	3	3	2	3	3
2	4	1	1	1	0	1	0	3	4	4	3	3	3	4	3	2	3	3	3	2	3	3	3	3	4	4	3	5	3	3	4	4	3	4	3	3	3	3	3	3	3	110	2	1	1	2	2	2	3
1	1	1	2	3	1	0	0	3	2	2	2	3	3	2	2	3	3	1	3	2	3	2	2	3	3	3	3	2	3	2	3	2	3	2	2	3	3	3	4	3	2	87	2	3	3	3	2	3	1
1	4	3	2	1	0	0	1	4	3	3	3	2	4	2	3	4	3	2	3	2	3	3	3	3	3	3	3	2	3	3	3	2	3	3	2	3	2	3	3	2	3	96	1	1	0	1	0	1	1
2	4	2	2	1	0	0	1	2	3	2	2	2	2	2	2	2	2	2	2	2	2	2	2	3	2	2	2	2	2	2	2	3	2	2	1	2	2	2	2	3	2	71	3	4	3	2	4	3	2
2	3	1	2	3	0	0	1	3	2	2	3	3	3	2	3	2	3	2	2	3	2	2	2	2	2	2	2	2	2	3	2	2	3	2	3	2	1	3	2	2	3	79	3	4	3	3	4	3	4
2	1	3	1	2	0	0	1	3	4	3	2	3	3	3	2	2	2	3	2	3	2	3	3	2	3	4	3	2	2	2	2	1	2	3	2	4	2	3	2	2	3	87	3	3	4	2	2	3	3
1	1	2	1	2	0	0	1	3	2	2	3	2	2	3	2	3	3	2	2	3	3	2	2	3	2	2	2	2	2	2	1	2	3	3	2	2	3	2	3	3	3	81	2	2	2	2	2	2	2
2	2	1	1	2	0	0	1	4	3	3	3	3	2	3	3	2	3	3	3	4	3	3	4	3	3	2	2	3	2	4	4	3	3	3	3	2	3	3	3	3	2	100	2	3	2	3	3	3	3
1	3	1	2	1	0	1	1	3	4	2	3	3	2	3	3	3	3	3	4	4	3	4	3	3	3	4	3	3	4	4	3	3	3	3	3	4	3	3	3	3	2	107	1	2	2	2	3	2	2
1	4	1	2	2	0	1	1	2	2	2	3	3	3	3	3	2	2	2	3	2	3	4	2	2	2	2	1	3	2	2	3	3	3	3	2	2	3	2	3	3	3	85	2	1	3	2	2	3	2
1	1	2	2	2	1	0	1	3	4	3	3	3	3	3	3	3	3	3	3	3	3	2	3	2	3	3	3	4	3	3	3	2	2	3	3	3	2	2	4	2	3	98	2	2	2	3	2	2	2
2	3	2	2	3	1	1	1	3	3	3	3	3	3	2	4	3	3	4	2	4	3	3	2	2	4	3	4	3	3	3	3	2	3	2	3	3	3	3	4	3	3	102	2	2	3	3	2	2	1
2	2	1	1	1	0	0	0	2	2	2	2	2	2	1	2	1	2	2	1	2	2	2	2	2	2	2	2	2	1	3	2	2	3	2	3	2	3	2	3	3	2	70	2	4	3	3	3	3	3
1	4	1	1	1	0	0	0	2	2	2	3	3	3	3	3	3	2	3	3	3	3	3	2	3	3	3	4	3	2	3	3	3	2	3	3	2	3	2	3	2	3	93	3	3	3	3	3	3	3
2	2	1	2	1	0	0	0	4	2	3	4	4	3	4	3	3	3	3	3	3	2	3	2	3	3	3	3	3	2	4	3	3	2	3	4	3	3	3	3	2	3	102	3	3	3	2	3	3	3
1	4	1	2	1	0	0	0	3	2	2	2	3	2	2	2	2	2	3	2	2	2	2	2	3	2	3	3	3	2	3	2	2	3	3	1	2	2	2	3	3	2	79	3	4	3	3	3	3	4
2	4	3	1	3	0	0	0	3	2	3	2	2	4	2	3	3	2	3	3	3	3	3	3	3	3	3	3	3	2	2	3	3	3	3	3	3	3	3	3	2	3	95	3	3	3	3	3	3	4
2	2	3	2	1	0	1	0	2	3	3	2	4	2	4	3	3	1	2	3	3	3	2	3	2	2	3	3	2	3	3	2	3	4	2	2	3	2	3	3	2	4	91	4	4	4	4	3	3	4
2	1	1	2	1	0	1	0	2	2	3	4	3	3	2	3	2	3	3	2	2	3	2	3	3	3	3	3	3	3	3	4	2	2	2	2	2	3	3	2	3	2	90	2	2	3	2	2	2	2
1	3	3	1	2	1	0	0	3	3	3	2	3	3	3	3	4	3	3	3	3	2	3	3	3	4	3	4	3	3	3	2	3	3	3	3	3	3	2	3	2	3	100	3	3	3	3	2	3	3
2	3	1	1	1	1	1	0	3	3	3	4	3	3	4	3	4	2	4	3	3	4	3	4	3	4	3	3	3	3	2	4	4	3	3	4	3	3	4	3	3	3	111	2	4	2	3	2	2	1
2	3	1	1	1	1	1	0	3	3	3	3	3	3	3	2	2	3	2	3	1	2	3	2	1	2	3	2	3	2	4	2	2	3	3	3	2	2	3	3	2	3	86	3	2	2	2	2	3	3
1	3	3	1	2	1	1	0	4	3	4	3	2	3	3	3	3	3	4	2	3	3	3	2	3	3	3	3	3	3	3	2	4	3	2	3	3	3	3	2	3	3	100	2	2	1	2	1	2	2
1	3	3	2	2	1	1	0	3	3	2	3	2	2	2	3	2	2	2	3	3	3	3	3	2	3	3	3	4	3	4	3	3	3	3	3	2	3	2	3	2	3	93	3	3	2	1	2	3	2
2	3	3	2	3	0	0	1	2	2	4	3	3	2	2	2	3	3	3	2	2	3	3	2	2	3	2	1	2	2	2	3	3	3	2	3	3	2	2	3	3	3	85	3	3	3	2	2	3	2
2	3	2	2	3	0	0	1	4	2	2	3	3	4	2	4	3	2	3	3	4	2	3	2	3	3	3	3	3	3	3	3	3	4	4	2	3	2	4	3	3	2	100	1	2	2	2	3	1	2
2	3	3	1	2	0	0	1	2	2	2	2	3	3	2	3	1	1	3	3	3	2	2	2	2	2	3	1	2	3	2	2	2	3	3	3	3	2	2	3	2	3	79	3	3	4	4	4	4	4
1	3	1	2	2	0	0	1	2	3	3	3	3	4	4	3	3	3	3	3	3	3	3	3	3	2	2	3	4	3	2	2	3	3	3	3	3	4	3	3	2	3	100	2	3	3	2	2	3	1
1	3	3	2	2	0	1	1	3	2	3	2	3	2	3	2	2	3	2	2	3	2	2	1	1	1	2	2	2	2	3	2	2	1	2	3	2	2	2	2	2	3	73	3	3	3	3	3	4	3
2	3	2	2	2	0	1	1	2	2	2	4	2	3	3	3	3	2	3	3	2	3	3	3	3	2	3	3	2	3	4	2	2	3	3	3	4	3	3	3	3	4	96	2	2	3	2	3	3	3
2	3	1	2	2	0	1	1	2	3	3	3	2	3	2	2	2	3	2	3	2	3	2	3	3	2	3	3	3	3	2	2	3	3	3	2	3	3	3	2	2	2	87	3	4	3	4	3	3	3
2	3	1	2	2	0	1	1	3	2	2	3	3	2	3	3	2	2	2	3	3	3	3	3	3	3	2	3	3	2	3	2	2	3	3	3	2	3	3	3	3	2	90	3	3	2	4	2	3	3
2	3	1	2	2	0	1	1	3	2	3	3	2	3	2	2	3	2	1	3	3	2	4	2	3	2	2	3	2	2	2	3	2	2	3	2	3	2	3	2	2	2	82	3	4	3	3	3	3	4
1	3	3	2	1	1	0	1	3	3	3	3	3	2	3	3	3	3	3	3	2	1	3	2	3	2	2	3	3	3	2	2	2	3	3	2	3	3	3	2	3	2	89	3	2	2	2	2	2	2
1	3	3	2	3	1	0	1	3	3	2	3	2	4	2	2	2	3	3	2	2	2	3	3	3	2	2	2	3	2	2	2	2	2	2	2	3	3	3	3	2	2	83	2	3	2	3	2	2	3
2	3	2	2	3	1	0	1	2	3	2	3	2	2	3	2	2	2	2	3	2	2	2	2	3	3	3	2	2	2	3	2	3	3	2	2	3	2	3	3	2	3	82	3	4	4	4	4	3	4
1	3	1	1	1	0	0	0	3	3	4	3	3	3	3	3	4	3	3	2	3	2	3	3	3	3	3	3	3	3	3	3	3	3	4	3	3	2	3	4	3	3	103	2	2	2	2	2	2	3
1	3	2	2	1	0	0	0	3	2	2	3	3	3	3	2	3	3	2	3	3	3	3	3	1	3	3	3	2	2	3	2	2	2	2	3	3	1	3	3	2	2	86	2	2	2	2	2	3	2
2	3	2	2	1	0	0	0	3	2	2	2	4	3	3	3	3	3	2	2	2	4	1	3	3	2	2	2	3	3	3	2	2	3	3	2	2	3	2	3	2	1	85	3	4	4	4	4	4	4
2	3	2	2	1	0	0	0	3	3	2	4	2	2	2	4	2	3	2	3	3	2	3	3	3	3	3	2	4	2	2	3	3	3	3	3	3	3	2	3	2	3	93	1	1	1	2	2	1	2
1	3	1	2	1	0	0	0	2	2	2	3	2	2	3	3	2	3	2	2	2	3	1	3	2	3	2	2	2	3	2	2	2	3	2	2	2	3	3	1	2	3	78	4	3	4	3	3	2	4
2	3	3	1	3	0	0	0	2	2	3	2	2	2	3	2	2	2	2	2	2	2	2	1	3	3	2	2	2	2	1	1	3	3	2	4	1	2	3	3	3	3	76	4	4	4	4	4	4	4
1	3	2	2	3	0	0	0	3	2	3	3	2	2	3	3	3	4	3	4	3	3	3	2	3	3	3	3	3	3	2	2	4	4	3	2	2	3	2	2	2	3	95	2	2	3	1	3	2	3
1	3	2	2	3	0	0	0	3	2	2	3	3	2	3	4	2	2	3	2	3	2	3	3	3	2	3	2	3	3	2	3	4	2	2	3	3	3	3	2	3	3	91	2	2	3	3	3	3	3
1	3	1	2	2	0	0	0	2	2	2	2	2	2	2	2	3	2	3	2	2	2	2	3	2	2	3	3	2	2	3	2	2	3	2	3	3	2	3	2	2	3	79	2	3	3	3	3	3	3
1	3	1	1	1	0	1	0	3	4	2	4	4	3	3	2	2	3	2	3	2	4	2	3	3	3	2	3	3	3	4	4	2	4	4	3	2	3	3	2	3	2	99	2	2	1	1	2	2	2
1	3	3	2	2	0	1	0	3	2	3	3	3	3	3	2	1	3	2	2	3	2	2	1	3	3	3	2	3	3	2	3	3	2	3	2	3	3	3	3	3	3	88	2	2	2	3	2	3	3
2	3	3	2	1	1	1	0	3	2	3	2	4	1	3	2	2	3	2	3	2	3	2	3	3	3	3	2	2	3	2	3	2	3	3	2	3	2	3	2	2	1	84	4	3	4	3	3	4	4
1	3	1	2	1	1	1	0	3	3	2	3	4	3	3	2	2	3	3	4	4	3	3	3	2	2	2	3	2	3	3	4	3	3	4	3	3	4	3	3	3	3	101	3	3	4	4	4	4	4
1	3	3	2	1	0	0	1	3	3	3	3	3	3	3	3	2	4	3	3	4	3	3	3	3	3	3	3	2	3	3	4	4	3	2	2	2	3	3	2	2	3	99	3	3	2	2	2	3	3
2	2	1	2	3	0	0	1	3	2	3	2	3	3	3	2	3	3	2	3	4	2	3	2	3	3	3	3	3	3	2	3	2	4	3	3	1	2	2	3	3	3	92	2	2	2	2	3	3	3
2	4	2	1	2	0	0	1	3	3	2	3	2	2	3	3	2	3	3	2	3	2	3	1	3	2	2	2	2	2	3	2	2	2	3	2	3	2	2	3	3	2	82	3	2	2	3	3	3	3
2	1	3	2	2	0	0	1	2	2	3	3	2	3	2	2	3	3	3	2	2	3	2	3	2	2	3	2	4	2	2	2	2	3	3	3	4	2	2	2	2	3	85	2	3	2	2	4	3	3
2	3	2	1	1	0	1	1	3	2	2	2	2	2	4	3	4	2	2	3	3	3	3	3	2	2	2	3	3	3	3	2	3	3	3	3	3	2	3	2	2	3	90	3	2	2	3	4	2	3
1	2	2	2	3	0	1	1	2	3	2	2	3	2	2	2	3	2	2	3	2	2	3	2	2	2	2	2	2	2	2	2	3	2	3	2	3	2	2	2	2	2	76	2	3	3	2	2	3	3
2	4	3	2	2	0	1	1	2	1	2	2	2	3	3	2	2	2	1	2	2	2	2	2	1	2	2	2	2	3	2	2	1	2	2	1	2	2	1	2	2	2	65	3	4	3	3	4	4	3
2	4	1	1	1	1	0	1	3	2	2	2	2	3	3	3	3	3	3	2	3	2	2	4	3	3	4	3	4	2	3	3	3	3	3	2	3	3	3	2	2	3	94	3	1	3	2	2	2	3
2	2	3	1	3	1	0	1	2	2	3	2	2	5	3	3	3	3	2	3	3	2	3	2	2	3	3	3	3	4	2	3	3	3	2	3	3	3	3	3	2	2	93	2	1	1	1	1	2	2
2	2	2	1	1	0	0	0	4	3	4	3	3	3	3	4	3	3	3	3	3	3	4	4	4	2	3	3	3	3	3	3	2	3	3	3	2	3	3	3	2	3	104	3	3	4	4	3	3	4
2	2	3	2	1	0	0	0	2	3	3	3	2	3	2	3	2	2	2	2	3	3	3	2	3	3	3	2	2	2	3	3	3	3	3	3	3	3	3	3	3	2	90	2	2	3	3	3	3	3
2	3	1	2	1	0	0	0	3	3	4	3	2	3	3	2	2	4	3	2	3	2	3	3	3	3	2	2	3	3	3	3	3	2	3	3	3	2	3	3	3	3	95	3	2	3	2	2	2	2
2	1	2	1	3	0	0	0	3	3	2	3	2	2	2	2	2	3	2	3	2	3	2	3	3	3	4	3	3	2	2	2	3	2	3	3	2	3	3	3	2	3	88	1	1	1	1	3	1	2
2	2	1	1	3	0	0	0	3	3	3	3	3	3	3	3	2	2	3	3	3	3	2	4	3	3	3	3	2	3	2	3	1	3	3	3	3	3	3	3	3	2	95	2	2	2	2	3	3	3
2	2	3	2	3	0	0	0	3	3	2	2	2	2	2	2	2	3	2	3	3	3	4	3	2	2	2	3	2	2	2	3	2	3	2	3	2	2	2	2	3	1	81	3	3	4	3	2	3	3
1	3	2	2	3	0	0	0	2	2	2	2	3	2	3	2	2	2	3	2	2	2	2	3	3	2	2	2	2	2	3	2	3	2	2	3	3	3	2	3	2	2	79	3	3	3	2	3	3	3
1	2	2	1	2	0	0	0	3	3	4	5	3	4	3	3	3	4	3	2	4	3	4	3	3	3	3	4	4	4	3	4	4	3	3	4	3	3	2	3	3	3	113	2	2	2	1	2	2	2
2	2	2	1	2	0	0	0	2	3	2	2	2	3	2	2	3	2	2	1	3	3	2	3	2	3	2	2	3	3	2	2	3	2	2	3	3	3	2	2	2	2	80	3	3	2	4	2	2	2
2	3	2	1	2	0	0	0	3	1	2	3	3	3	1	3	3	2	2	2	2	1	3	2	2	3	2	3	2	3	3	3	2	3	2	2	2	3	2	2	2	3	80	3	4	3	4	4	4	3
1	1	2	1	2	0	0	0	3	4	3	2	3	3	2	3	3	3	3	3	3	3	3	2	3	2	3	3	3	2	2	3	2	2	3	2	2	2	3	3	2	2	90	3	4	3	3	3	3	3
1	1	3	2	2	0	0	0	3	2	3	2	2	3	3	2	3	3	2	3	3	2	3	3	2	2	3	2	3	2	2	2	3	3	2	2	2	3	3	3	2	3	86	2	2	2	3	2	2	2
1	3	3	1	3	0	1	0	2	3	3	2	2	3	2	2	3	3	3	3	2	2	2	3	2	1	2	2	2	2	2	3	2	3	3	2	2	3	3	3	1	3	81	2	3	3	2	3	2	4
2	1	2	2	3	0	1	0	2	3	2	2	2	3	2	2	3	2	2	2	2	2	3	2	2	2	1	3	2	1	2	2	1	2	2	2	2	2	2	1	1	1	67	4	4	3	3	3	2	3
1	2	2	1	2	0	1	0	3	2	2	3	2	3	3	2	3	2	2	2	3	3	4	3	3	3	2	3	3	3	2	2	2	3	4	2	4	3	3	3	2	3	92	3	3	3	3	3	3	3
1	3	2	1	2	0	1	0	2	2	2	2	2	2	2	3	3	3	3	3	2	2	2	3	2	3	2	2	2	3	2	3	3	3	3	2	3	2	2	2	3	3	83	2	3	2	2	2	3	3
2	1	2	2	2	0	1	0	3	3	3	3	3	3	3	3	3	2	3	3	3	3	4	3	3	3	2	3	2	3	3	2	3	3	2	1	2	3	3	3	4	2	95	2	3	4	4	2	3	4
1	2	2	1	1	1	0	0	3	2	2	3	3	2	1	2	3	2	2	3	4	3	2	3	2	3	3	2	2	2	3	3	2	2	2	3	3	3	3	3	3	2	86	3	2	3	3	4	3	3
2	2	1	1	3	1	0	0	3	3	4	2	3	3	3	3	3	2	4	2	2	3	3	3	3	2	2	3	3	3	2	3	3	2	3	3	4	3	3	3	3	2	96	2	3	4	2	4	3	2
2	1	3	2	2	1	0	0	2	2	2	2	4	3	3	2	2	3	3	3	3	3	2	3	3	2	2	3	2	2	3	4	4	3	3	3	2	3	3	3	3	3	93	3	3	2	4	3	4	4
1	1	1	2	1	1	1	0	2	3	3	3	3	2	2	3	2	2	3	3	3	3	2	2	3	3	3	3	3	3	2	3	3	3	2	2	2	3	3	3	3	2	90	3	3	3	2	3	2	3
2	1	3	2	1	0	0	1	3	4	3	3	3	3	2	2	2	3	2	3	3	2	3	3	4	3	3	3	3	3	3	3	3	2	3	3	2	2	3	3	3	3	96	3	3	3	3	3	3	3
2	3	3	1	2	0	0	1	2	2	2	3	3	3	3	2	3	2	2	2	2	3	2	3	3	2	2	3	3	2	2	3	2	3	3	3	3	2	3	2	2	3	85	2	2	3	4	2	4	4
2	2	2	1	2	0	0	1	3	2	2	2	3	3	3	3	3	2	3	3	2	3	4	2	2	3	3	2	2	3	2	2	3	3	3	3	3	3	3	3	2	2	90	3	3	2	3	2	2	2
1	4	3	2	2	0	0	1	3	3	3	3	4	3	3	3	3	2	4	3	4	4	2	3	3	3	4	3	3	4	3	4	2	3	3	3	4	3	4	3	2	3	107	2	2	3	2	2	2	2
2	3	2	2	1	0	1	1	3	3	3	2	4	3	4	4	3	3	3	4	3	4	3	3	3	2	3	4	2	3	3	3	3	4	3	2	3	2	2	2	4	2	102	2	3	2	3	3	2	3
2	3	3	2	3	0	1	1	3	4	3	3	4	3	3	3	3	3	3	4	3	3	3	3	3	4	4	3	3	3	4	3	3	3	3	3	4	3	3	3	4	4	111	2	2	2	1	1	1	1
2	3	3	1	2	0	1	1	3	3	3	3	3	3	2	2	3	2	4	3	2	2	3	3	2	3	3	4	3	2	2	3	2	3	3	3	3	3	3	3	3	2	94	1	1	3	2	2	1	2
2	1	2	2	2	0	1	1	3	3	3	2	3	2	3	3	4	2	3	3	3	3	3	2	4	2	3	3	3	3	4	4	2	4	2	3	3	3	3	3	3	2	99	2	2	1	1	1	1	1
2	1	3	1	2	1	1	1	4	2	2	3	3	3	3	2	3	2	3	3	2	3	2	2	2	3	2	4	3	4	3	3	3	2	2	2	2	2	2	3	2	4	90	2	3	2	3	3	3	3
2	2	3	2	1	0	0	0	2	3	2	2	3	2	2	2	3	3	3	3	3	3	2	3	3	2	2	4	3	3	3	3	3	3	3	3	3	3	3	3	3	3	94	2	3	2	1	2	3	2
2	2	3	2	1	0	0	0	3	3	2	3	2	3	3	3	3	4	2	3	3	3	2	3	1	4	3	3	3	2	2	3	2	2	3	3	3	3	3	4	2	2	93	3	4	1	3	3	3	3
1	4	2	2	1	0	0	0	3	2	3	2	3	2	1	3	2	2	3	3	2	1	2	2	2	2	2	3	3	1	2	2	2	2	3	2	2	3	3	3	2	2	77	3	2	2	2	2	2	3
1	2	3	1	3	0	0	0	2	2	3	3	2	3	2	3	3	2	2	2	2	3	3	2	2	2	3	1	2	3	2	2	2	3	3	3	2	3	2	3	3	2	82	3	4	3	3	4	3	2
1	3	2	1	3	0	0	0	2	3	2	2	2	3	3	3	3	3	2	2	2	3	2	2	3	2	4	2	2	2	3	2	3	3	3	3	2	3	2	3	2	2	85	3	2	4	3	3	3	3
2	4	3	2	3	0	0	0	2	3	3	2	2	3	3	3	2	2	3	2	3	2	3	3	2	3	2	3	3	2	2	2	3	3	3	2	2	2	2	2	2	3	84	2	1	3	0	2	2	2
1	1	2	2	3	0	0	0	2	3	2	3	2	2	4	2	3	2	2	3	3	3	2	2	2	2	3	2	3	3	2	4	2	3	3	3	2	2	3	1	2	2	84	3	3	3	3	2	3	3
2	1	3	1	2	0	0	0	3	3	2	3	2	3	2	3	3	3	2	2	3	3	2	2	3	2	2	3	3	2	2	2	3	3	3	3	3	2	3	2	2	2	86	3	4	2	4	3	3	3
1	4	1	1	2	0	0	0	3	2	2	2	3	2	2	2	1	2	3	2	3	3	2	2	2	2	2	2	3	2	2	3	2	2	2	2	2	2	3	2	2	3	76	2	3	3	3	3	3	2
1	1	1	1	2	0	0	0	3	3	2	3	3	2	3	3	3	3	3	3	3	3	2	3	3	4	3	3	2	4	3	2	4	4	4	3	2	2	3	3	4	4	102	2	3	2	3	3	4	1
1	4	3	2	2	0	0	0	2	2	2	2	2	4	3	2	2	2	2	3	2	2	2	3	2	2	2	3	3	3	4	3	3	2	3	2	1	3	3	3	3	3	85	2	2	2	2	3	3	2
1	4	1	2	2	0	0	0	3	2	2	2	1	2	2	2	1	2	2	4	1	3	2	2	2	2	3	2	2	3	2	2	2	2	2	2	2	3	3	3	1	3	74	3	3	2	2	3	3	3
2	3	2	1	1	0	1	0	3	3	3	3	2	3	3	3	2	3	3	2	2	3	2	2	2	2	2	2	3	2	3	3	2	2	3	2	2	3	2	3	3	4	87	3	3	4	3	4	4	3
2	1	1	2	1	0	1	0	2	3	3	3	2	3	3	2	3	3	2	2	3	3	4	2	3	3	3	2	3	4	2	3	2	3	4	4	3	3	3	2	3	3	96	2	2	2	3	3	3	2
1	2	2	1	1	1	0	0	3	3	3	3	4	4	3	3	4	2	3	3	4	3	3	3	3	2	3	3	3	3	4	3	3	3	3	3	4	3	3	3	3	3	106	3	4	4	4	4	3	3
2	3	2	1	1	1	0	0	3	3	3	3	2	3	2	3	3	3	3	3	3	2	3	3	3	3	3	3	2	3	3	2	2	2	3	3	2	2	3	2	2	3	91	1	2	1	2	1	2	3
2	1	3	2	2	1	0	0	2	2	3	2	3	3	2	3	2	3	2	2	2	2	2	3	2	3	3	3	2	2	3	2	2	2	3	3	3	2	3	2	2	3	83	3	2	3	2	4	3	3
2	1	1	2	2	1	0	0	2	3	2	3	2	3	2	2	1	2	2	2	3	3	2	1	3	2	3	2	3	3	3	2	4	2	2	2	1	2	2	2	2	2	77	2	3	3	2	2	2	3
2	2	2	1	1	1	1	0	2	2	4	2	3	2	3	2	4	3	3	4	3	2	2	3	2	2	3	2	3	4	3	4	3	3	3	3	3	3	3	3	2	3	96	1	2	2	2	1	3	3
2	1	1	1	1	1	1	0	2	3	3	2	3	2	2	3	3	2	3	3	2	2	3	2	2	3	3	2	3	3	2	3	3	3	3	3	2	3	2	3	3	3	89	2	3	2	3	3	3	4
1	4	1	2	1	1	1	0	3	3	3	3	2	1	2	2	2	3	2	2	3	3	3	3	2	2	3	2	3	3	2	1	2	1	2	2	2	1	2	2	2	2	76	3	3	2	3	3	2	2
2	4	2	2	2	1	1	0	2	3	2	2	3	3	2	2	3	3	2	3	2	3	2	2	2	2	2	3	2	3	3	3	2	3	3	2	3	2	3	3	3	3	86	2	3	2	2	2	2	2
1	3	3	1	3	0	0	1	1	1	2	2	3	2	2	3	3	2	2	2	2	2	2	3	2	2	2	2	2	2	2	2	2	2	3	3	3	2	3	2	3	1	74	2	3	3	3	3	4	3
2	4	3	1	3	0	0	1	2	3	3	3	2	1	2	3	3	3	3	2	2	2	3	2	2	3	2	3	2	2	2	3	3	3	2	2	1	3	3	2	2	3	82	4	3	3	3	4	3	3
2	2	3	2	2	0	0	1	3	2	3	3	3	3	3	2	2	2	2	3	3	3	2	3	2	3	3	2	2	3	3	2	2	3	3	3	3	3	3	2	2	3	89	2	3	1	3	3	3	3
2	4	3	1	3	0	1	1	3	3	2	2	2	2	1	2	2	3	2	2	2	2	2	2	2	2	2	2	3	2	2	2	2	3	2	2	1	2	2	2	3	2	72	2	3	2	3	3	2	2
2	3	2	2	2	0	1	1	3	3	3	3	4	4	3	3	3	2	3	3	2	3	3	3	2	3	3	2	2	4	3	3	3	2	2	2	4	4	3	4	4	3	101	3	2	3	3	3	3	2
2	4	3	1	2	1	0	1	2	2	3	3	2	2	3	3	3	3	3	3	3	3	3	3	3	2	2	2	3	3	2	3	3	3	3	3	2	3	3	3	2	2	91	2	2	3	3	4	2	2
1	3	1	1	2	1	0	1	2	2	2	2	3	3	2	2	2	3	3	1	2	2	2	2	2	2	3	2	2	1	3	4	3	3	2	3	2	1	2	2	2	3	77	3	3	2	2	1	3	3
2	4	3	2	1	1	1	1	2	2	3	2	2	4	3	4	3	3	2	3	2	3	3	2	2	3	2	2	3	3	2	3	3	2	2	3	3	3	3	2	3	2	89	2	2	3	2	2	2	2
2	4	1	1	1	0	0	0	3	3	1	3	3	3	2	2	2	2	2	3	3	2	2	2	2	2	2	2	3	2	2	2	3	3	2	2	2	2	3	2	2	2	78	3	3	3	3	3	3	3
2	4	3	1	3	0	0	0	3	3	3	2	3	3	2	3	2	2	2	2	3	4	3	3	3	3	3	2	3	2	2	3	2	3	3	4	2	2	3	2	3	3	91	3	3	2	3	4	2	4
2	1	2	1	3	0	0	0	2	3	2	2	2	2	1	3	2	3	2	2	2	3	1	1	3	3	2	2	3	2	2	2	3	3	2	2	2	2	2	3	2	2	75	4	3	3	3	3	3	3
2	3	1	1	3	0	0	0	3	3	3	3	2	3	2	2	2	3	2	1	3	3	4	2	3	2	3	2	3	3	3	3	4	2	4	3	2	4	3	3	3	2	93	2	3	3	4	3	3	3
1	4	1	1	3	0	0	0	2	2	2	2	3	2	3	3	3	3	3	2	2	3	3	2	2	2	2	3	2	3	2	3	2	2	3	2	2	3	2	2	3	3	83	3	4	3	3	3	3	3
2	3	3	2	3	0	0	0	3	3	3	3	2	2	2	2	3	3	3	4	3	2	2	3	3	3	4	3	3	3	3	3	3	3	3	3	3	3	3	3	3	2	97	3	4	4	4	4	3	4
1	4	3	2	2	0	0	0	4	3	3	3	3	2	3	4	3	3	3	3	3	4	3	4	3	3	3	3	4	4	3	3	4	3	3	3	4	3	3	3	3	2	108	3	2	2	2	3	3	2
1	2	1	2	2	0	0	0	1	2	2	3	2	3	3	3	1	1	2	1	2	2	2	2	2	2	2	2	2	2	2	2	2	1	1	2	3	2	2	3	3	2	69	3	2	3	3	3	2	3
2	4	3	1	1	0	1	0	3	3	3	3	3	3	3	3	3	3	3	4	3	2	3	2	3	3	3	2	3	3	3	3	3	3	3	4	4	3	3	3	3	4	103	3	3	3	3	4	4	4
1	2	2	1	3	0	1	0	3	2	3	3	2	2	3	2	3	3	3	3	3	3	3	2	3	2	2	3	3	2	3	3	2	2	2	2	4	3	3	3	3	3	91	2	3	2	2	3	2	3
2	2	2	1	3	0	1	0	2	2	1	3	4	4	3	3	2	3	3	2	3	2	4	2	2	2	3	2	2	2	3	3	2	2	2	3	2	2	3	3	3	2	86	1	2	2	2	1	2	1
2	2	3	1	2	0	1	0	3	3	2	3	2	2	3	3	2	2	2	2	4	2	2	2	3	3	3	3	2	3	3	2	3	2	3	3	3	3	3	2	2	3	88	1	1	1	1	1	2	1
2	1	1	1	2	0	1	0	3	3	2	3	2	2	2	2	3	4	3	2	3	2	3	2	2	2	2	3	3	2	3	2	3	2	3	2	3	1	3	3	2	3	85	2	2	2	2	2	2	1
2	2	2	2	2	0	1	0	2	3	2	3	4	3	3	3	2	3	3	3	3	2	2	1	2	1	3	2	2	3	2	3	2	3	3	2	2	3	3	3	3	2	86	3	3	3	3	3	3	2
1	3	3	1	1	1	0	0	3	3	3	3	2	3	4	3	3	2	3	2	3	2	2	3	2	3	3	2	2	3	2	2	3	4	3	3	3	3	2	2	4	2	92	3	3	3	3	3	3	3
2	1	1	1	3	1	0	0	2	2	3	2	3	3	1	3	2	2	3	2	3	2	2	3	2	2	2	3	2	2	2	2	3	2	2	2	2	1	3	2	2	2	76	4	2	4	3	2	2	3
2	4	2	1	1	1	1	0	3	4	2	4	3	2	3	3	3	4	3	4	3	3	3	3	2	3	3	2	3	2	3	3	4	2	3	3	3	2	2	4	3	3	100	1	2	1	2	1	2	1
1	1	1	2	1	1	1	0	3	2	3	2	3	3	3	3	3	2	3	3	2	2	2	3	3	3	3	3	3	2	3	2	2	3	2	3	3	2	3	2	3	3	90	2	3	2	3	3	1	2
2	3	2	1	3	1	1	0	3	3	2	2	3	3	3	3	3	3	3	2	2	3	2	4	2	2	3	3	3	3	3	3	3	3	2	2	3	4	3	3	3	3	95	3	3	4	3	3	3	3
1	3	3	2	1	0	0	1	4	3	2	3	3	3	2	3	3	2	3	3	2	3	3	2	3	4	3	3	3	3	2	3	3	2	2	2	4	2	2	3	3	3	94	2	1	2	1	2	2	2
2	4	3	2	1	0	0	1	3	3	3	3	3	4	3	2	2	4	3	3	3	3	2	3	3	3	2	3	2	3	3	2	3	3	3	3	3	2	3	3	3	2	96	2	1	2	2	2	2	2
1	1	3	2	3	0	0	1	3	2	3	2	2	2	2	3	2	3	3	2	2	2	2	2	2	2	1	1	2	3	2	1	2	2	1	3	2	2	2	2	1	1	69	4	4	4	3	4	3	4
2	1	3	2	3	0	1	1	3	4	3	3	3	3	3	3	3	4	4	3	3	3	3	2	3	2	3	3	3	4	3	3	2	2	3	2	3	3	2	3	2	3	99	2	3	2	1	2	3	2
1	4	2	1	2	0	1	1	2	4	3	3	3	2	4	2	2	3	3	3	2	2	2	3	3	3	2	3	2	3	4	3	2	3	3	3	4	2	4	4	2	3	96	3	2	2	2	2	2	2
2	3	3	1	1	0	0	0	3	4	3	3	3	3	3	2	3	2	4	4	3	3	3	3	3	3	2	2	3	3	3	4	3	4	3	3	3	3	3	3	3	3	103	3	3	3	2	2	2	3
2	2	2	1	1	0	0	0	2	2	3	3	2	2	3	3	2	2	3	2	3	3	2	2	3	2	2	2	3	2	1	2	2	2	3	2	2	1	3	1	3	2	77	3	4	4	4	4	4	4
2	3	2	1	1	0	0	0	4	3	2	2	2	3	2	3	3	2	3	2	3	2	2	3	2	2	3	3	2	3	3	3	3	3	2	2	3	3	3	3	3	3	90	3	3	4	4	4	4	3
2	3	3	2	1	0	0	0	3	2	2	2	2	1	2	2	2	2	3	2	2	2	2	2	3	2	3	2	3	2	2	2	1	2	2	2	3	2	2	2	3	3	74	3	3	3	3	2	2	2
2	3	2	1	3	0	0	0	3	3	2	2	2	2	2	2	2	3	3	3	1	3	2	2	2	2	3	3	3	3	3	2	2	2	2	2	2	3	2	3	3	2	81	3	2	3	3	3	2	3
2	3	2	1	2	0	0	0	3	2	3	3	3	2	2	3	3	3	3	2	3	1	3	3	4	2	2	2	3	3	3	3	4	2	3	2	2	2	2	3	3	3	90	2	2	2	1	2	2	1
2	4	2	2	2	0	0	0	2	1	2	3	3	2	2	2	1	2	2	3	2	2	3	1	3	3	3	2	2	1	2	2	2	2	2	2	2	3	2	2	3	2	73	3	3	3	2	2	3	3
2	2	2	1	1	0	1	0	1	3	3	3	2	3	2	3	2	3	2	3	3	3	3	3	2	2	2	2	2	3	3	2	3	2	3	3	2	2	3	3	2	3	86	3	2	2	2	2	2	3
1	1	1	2	1	0	1	0	2	3	3	2	3	2	3	3	2	2	3	3	3	2	3	3	3	2	3	2	3	4	3	3	3	2	2	3	3	3	3	3	3	3	93	2	3	2	4	3	3	2
2	3	1	2	3	0	1	0	2	3	2	3	3	2	3	2	3	3	3	3	3	3	3	2	1	3	2	3	3	2	3	2	3	3	2	2	2	3	2	2	3	2	86	2	3	2	2	2	2	3
1	3	2	2	2	0	1	0	3	3	3	2	2	3	2	3	2	2	2	3	2	2	3	3	1	3	3	2	2	2	2	2	2	3	3	3	2	2	3	2	3	2	82	3	2	3	3	2	3	3
2	3	2	2	2	0	1	0	3	3	3	3	3	2	3	3	2	3	2	2	3	2	3	3	3	3	2	3	3	3	3	3	3	3	3	3	3	2	2	2	3	2	92	4	4	4	3	4	4	3
1	4	2	2	2	0	1	0	3	3	3	3	3	3	3	3	3	3	3	2	3	3	4	4	3	4	2	3	3	3	2	3	3	3	4	4	4	3	4	3	3	3	106	3	3	3	3	4	3	3
2	2	1	2	2	0	1	0	3	2	3	2	3	3	3	2	2	3	3	2	3	3	3	2	4	2	3	3	3	3	2	3	2	2	3	2	2	3	2	3	3	2	89	1	2	2	3	2	2	3
2	2	3	1	3	1	1	0	3	2	2	3	3	3	3	2	2	3	3	2	2	2	3	2	3	2	2	3	2	2	3	2	3	2	3	2	3	3	3	2	2	2	84	3	3	2	2	2	2	2
1	3	1	2	2	1	1	0	2	2	2	3	3	2	2	3	3	2	3	1	2	3	3	2	2	3	3	2	2	3	2	2	3	2	3	3	3	2	3	2	3	3	84	2	1	2	2	3	3	2
2	1	1	1	1	0	0	1	3	3	3	3	4	2	3	4	4	3	3	3	3	3	3	3	3	3	2	3	3	2	4	2	3	2	3	3	3	3	3	3	3	3	101	3	3	2	3	3	3	3
1	2	1	2	3	0	0	1	2	2	3	3	2	2	3	2	3	3	3	3	2	2	3	2	2	2	2	3	2	3	1	2	2	2	2	3	3	3	3	2	1	3	81	4	3	3	3	4	3	3
2	4	1	2	3	0	0	1	4	3	3	3	3	4	3	3	3	4	3	3	3	3	3	3	2	2	4	4	4	3	2	2	3	3	2	3	3	3	3	3	3	3	103	2	4	2	3	3	3	2
1	4	1	1	2	0	0	1	1	2	3	3	2	3	2	2	2	3	3	2	2	3	1	2	2	2	2	3	2	3	2	2	2	2	2	2	2	2	2	3	3	2	76	2	3	2	3	2	2	2
1	4	3	2	2	0	0	1	2	3	2	2	3	3	3	2	4	3	3	2	3	3	3	3	3	3	3	3	2	3	4	3	3	3	2	3	3	3	2	3	3	3	96	2	2	3	3	2	2	2
2	4	2	1	1	0	1	1	3	3	4	3	3	3	3	3	3	2	3	4	2	2	2	3	3	2	4	3	3	2	3	3	3	3	4	3	3	3	3	3	3	3	100	1	1	1	2	2	1	2
2	4	2	1	1	0	1	1	3	3	3	2	3	3	2	2	3	3	3	3	2	3	3	3	3	2	2	3	3	2	2	3	2	3	3	3	2	2	3	3	3	3	91	3	2	2	2	2	2	3
1	4	1	2	1	0	1	1	2	2	2	2	3	3	3	3	3	3	2	3	3	2	3	2	2	2	3	2	3	3	2	3	3	3	2	3	2	2	2	3	2	3	86	3	3	4	3	2	3	3
1	4	3	2	3	0	1	1	2	3	2	3	2	2	2	2	3	1	2	3	2	1	3	2	2	2	2	3	2	2	3	3	2	3	2	2	2	2	2	3	3	2	77	4	3	2	3	2	3	2
1	4	1	1	2	0	1	1	3	3	3	2	2	3	3	3	3	3	3	3	3	2	3	3	3	3	3	3	3	3	4	2	3	3	3	3	3	3	3	3	2	3	98	3	3	3	2	2	2	3
2	4	3	2	3	1	0	1	3	3	3	3	3	4	4	3	3	4	3	3	4	3	3	3	4	2	3	3	4	3	3	4	3	3	2	3	2	3	3	3	2	3	105	2	1	3	3	2	2	3
2	4	3	2	2	1	0	1	2	2	4	3	2	3	2	2	2	3	3	3	2	2	3	3	2	3	2	2	3	3	3	2	3	3	2	2	3	3	3	2	3	2	87	2	3	2	4	2	3	2
1	4	3	1	1	0	0	0	3	1	2	2	3	3	2	2	3	3	2	3	3	2	3	4	2	2	2	1	2	3	3	3	2	3	2	2	1	2	3	2	2	1	79	2	3	4	3	2	3	3
1	4	1	1	1	0	0	0	2	3	3	2	2	2	3	3	3	3	2	3	3	3	2	3	2	3	3	3	2	2	3	3	2	2	3	3	3	2	4	3	2	3	90	2	1	2	2	2	3	3
1	4	3	2	1	0	0	0	3	2	2	2	3	2	2	1	2	2	3	2	3	2	2	2	2	3	1	3	2	2	2	3	2	3	2	3	3	3	3	2	3	3	80	3	3	3	4	3	2	2
2	4	2	2	1	0	0	0	3	2	2	2	2	2	2	2	3	2	3	3	3	2	3	2	3	2	1	3	2	2	2	2	4	2	2	2	2	2	3	1	2	3	78	2	3	2	3	3	2	2
2	4	3	1	3	0	0	0	3	3	3	3	2	3	3	3	2	3	3	2	3	3	3	3	3	2	2	2	3	2	2	3	2	3	2	3	3	2	2	2	3	3	89	3	3	3	1	2	3	3
2	4	1	1	3	0	0	0	3	2	3	3	1	3	3	2	2	2	3	3	3	1	2	2	2	2	3	3	2	3	2	2	2	2	2	2	2	2	3	2	3	2	79	4	4	3	3	3	3	3
2	4	1	1	3	0	0	0	3	3	1	3	3	3	1	3	2	2	3	3	2	2	3	2	3	3	2	3	2	2	2	2	2	2	3	3	2	3	1	2	3	2	81	3	3	3	3	3	3	4
2	4	2	2	3	0	0	0	4	2	2	3	2	3	3	2	3	3	3	3	2	2	3	3	3	4	3	3	3	1	3	3	3	3	2	3	3	3	3	2	3	3	94	2	4	4	3	2	3	2
2	4	3	1	2	0	0	0	3	3	3	2	2	1	1	2	3	2	2	2	2	3	3	2	2	2	2	2	3	3	2	2	2	1	2	2	2	2	2	3	2	2	74	2	2	4	3	3	4	3
2	4	2	1	2	0	0	0	3	4	3	2	3	2	2	3	2	2	2	1	2	2	2	2	3	2	2	3	3	2	2	2	3	3	2	3	3	2	3	3	3	2	83	4	3	3	3	4	4	3
1	4	2	2	2	0	0	0	3	4	3	3	4	3	3	3	3	2	3	3	3	3	3	3	3	3	2	3	4	4	3	4	3	3	3	3	3	3	3	3	3	3	105	2	3	3	3	2	3	3
2	4	3	1	1	0	1	0	3	3	3	2	3	2	2	3	3	3	2	3	3	1	2	3	3	3	3	3	3	3	3	3	3	2	3	2	3	3	2	3	3	1	90	3	3	3	3	3	3	3
2	2	2	1	1	0	1	0	2	2	3	2	2	3	2	3	2	3	3	2	2	2	3	2	2	2	2	2	3	3	3	3	3	2	2	2	2	2	3	2	2	3	81	3	3	3	3	2	3	2
2	3	2	1	1	0	1	0	2	3	2	2	3	2	3	2	3	3	2	2	1	3	2	3	1	2	2	3	3	1	3	2	3	2	2	2	2	3	3	2	2	3	79	4	3	3	3	2	3	4
1	3	3	1	3	0	1	0	2	4	3	4	4	3	3	3	3	2	2	3	3	3	4	4	3	2	3	3	3	4	3	4	3	2	3	4	4	3	2	3	2	4	105	3	2	2	1	2	2	2
1	2	3	2	3	0	1	0	3	3	3	2	3	3	3	3	4	2	2	4	3	3	2	3	3	2	2	3	2	2	2	3	3	3	4	3	3	3	3	3	2	4	96	3	2	3	2	2	3	3
1	2	1	2	3	0	1	0	2	4	2	2	3	3	3	3	4	3	3	4	3	2	4	3	4	4	3	4	3	3	3	3	2	3	2	2	2	3	3	3	3	3	101	2	3	2	2	3	2	3
2	2	1	1	2	0	1	0	2	3	3	3	3	3	2	3	3	3	3	4	3	3	3	2	3	3	3	3	3	3	2	2	3	3	3	3	3	3	2	4	3	3	98	2	2	1	2	2	2	2
2	4	1	2	3	1	0	0	3	3	3	3	2	3	4	3	2	3	3	3	3	3	2	3	4	3	3	3	3	3	3	3	3	2	3	3	4	3	3	3	3	3	101	4	3	3	3	3	4	3
1	3	1	1	2	1	0	0	3	2	2	1	3	3	3	3	3	2	3	2	2	2	3	3	2	2	2	3	2	2	3	3	2	3	2	2	3	3	2	2	3	3	84	2	1	2	2	1	2	2
2	3	2	2	2	1	0	0	3	3	3	3	3	3	2	3	3	3	4	3	3	2	3	3	3	3	2	2	3	3	4	2	3	3	2	2	4	2	3	3	3	2	96	3	3	3	3	3	3	3
2	1	2	1	2	1	1	0	2	2	3	3	3	2	3	2	3	3	2	2	3	3	3	2	3	2	3	3	3	2	3	3	2	3	2	2	2	2	2	2	2	3	85	2	2	3	3	2	2	3
1	4	1	2	2	0	0	1	3	4	3	2	2	3	3	3	3	2	2	3	3	3	2	3	1	3	3	3	3	4	2	4	3	3	3	3	3	3	3	2	3	3	96	3	2	2	1	2	2	1
2	1	2	2	2	0	0	1	2	2	2	2	2	2	2	2	3	3	3	2	3	3	2	3	3	3	3	3	2	3	3	2	2	2	2	2	2	1	3	3	2	2	81	3	3	3	4	3	4	4
2	1	2	2	2	0	0	1	3	3	3	3	2	3	2	2	3	2	3	4	3	2	4	2	2	2	3	3	2	3	2	3	3	2	3	3	3	2	3	3	3	3	92	2	1	1	2	2	3	1
1	4	3	1	2	0	0	1	2	2	4	2	3	3	3	2	2	3	2	2	4	3	2	2	2	2	3	3	2	3	3	3	3	2	2	3	3	3	3	3	3	2	89	4	3	3	3	3	3	4
2	4	3	1	2	0	0	1	1	1	2	2	2	2	2	2	2	2	2	2	2	2	2	2	2	3	3	1	1	1	2	2	2	3	3	2	1	2	2	2	2	2	66	3	2	4	3	3	2	4
2	1	1	1	2	0	1	1	3	2	3	3	2	2	3	2	2	3	2	2	2	2	3	3	3	3	2	3	3	1	2	3	3	2	2	2	2	3	3	2	4	3	85	4	4	3	3	3	3	4
2	4	1	1	2	0	1	1	3	3	4	2	3	2	2	3	3	3	3	2	3	3	3	2	2	3	3	3	2	3	3	3	2	3	3	2	2	3	3	3	3	3	93	2	2	2	1	1	2	2
2	1	3	2	2	0	1	1	3	3	1	2	3	2	3	3	3	3	3	3	3	2	2	2	3	3	2	2	2	2	3	2	2	2	2	3	3	3	2	3	3	3	86	3	3	3	2	3	3	2
2	3	1	2	2	1	0	1	3	3	3	2	3	2	3	3	2	4	3	2	3	2	1	2	2	2	2	3	2	3	2	2	3	3	3	2	2	3	2	2	3	3	85	2	2	2	3	3	2	2
2	4	1	2	2	1	0	1	3	2	2	2	3	2	4	3	3	3	3	2	3	3	2	3	2	2	3	2	3	3	2	3	4	3	3	2	3	3	2	4	4	3	94	1	2	2	2	3	2	2
2	4	1	2	2	1	1	1	3	3	2	3	2	3	3	3	3	2	3	3	3	2	2	3	3	3	4	2	3	3	3	3	3	3	3	2	3	2	3	3	3	3	95	3	3	4	4	4	3	2
2	1	3	2	2	0	0	0	3	4	4	3	2	3	3	3	4	2	2	3	3	3	4	3	3	3	3	3	4	3	3	3	3	4	3	3	3	3	3	3	2	3	104	3	3	3	3	3	3	4
1	4	1	2	2	0	0	0	3	2	3	3	2	2	2	3	3	2	1	3	2	2	3	2	3	3	2	2	2	3	3	2	2	3	1	3	2	3	2	3	3	2	82	3	3	2	2	3	3	2
2	3	1	1	2	0	0	0	2	2	2	2	2	2	3	3	1	3	3	1	1	2	2	1	2	3	2	2	3	1	2	3	3	3	3	2	2	3	2	2	2	2	74	3	2	2	3	2	2	3
2	4	1	1	2	0	0	0	3	4	4	4	3	3	3	3	2	2	3	4	3	3	4	3	4	3	3	4	3	2	4	3	4	4	3	3	3	3	4	3	3	4	111	2	1	1	1	1	1	1
2	4	1	1	2	0	0	0	3	3	3	3	2	3	3	2	3	3	4	2	4	3	2	3	2	3	3	3	3	3	3	3	2	3	3	3	4	3	4	3	3	2	99	3	2	2	2	2	3	2
1	2	2	2	2	0	0	0	2	3	2	2	2	2	3	3	2	1	3	3	2	3	2	2	3	2	3	3	2	2	2	3	2	3	3	3	3	3	2	2	3	3	84	3	3	3	3	3	3	3
1	3	2	2	2	0	0	0	4	2	3	2	2	2	3	3	4	3	2	3	3	2	3	3	3	2	3	3	3	4	3	3	2	2	2	3	3	3	4	2	2	3	94	2	3	3	3	3	2	3
2	1	3	1	2	0	0	0	2	3	3	3	3	2	3	3	4	3	3	3	3	3	3	3	3	3	2	2	4	3	4	3	4	3	3	2	3	4	3	2	2	4	101	4	4	2	4	3	3	4
2	4	2	1	2	0	0	0	4	2	2	2	2	2	2	2	2	3	2	3	3	2	2	3	2	2	1	1	3	2	3	2	3	3	2	2	2	3	3	4	2	3	81	2	3	2	2	3	3	4
1	3	1	1	2	0	0	0	3	2	2	3	3	3	3	3	3	2	3	3	3	3	3	3	3	2	2	3	4	4	1	3	2	2	3	3	3	2	3	2	3	3	93	2	2	3	3	2	3	2
1	3	3	1	2	0	1	0	3	2	3	2	3	3	2	2	3	3	1	3	3	2	3	2	2	3	2	2	2	3	1	3	2	3	3	2	3	3	2	2	2	2	82	3	4	2	3	3	3	3
2	3	1	1	2	0	1	0	3	3	3	2	3	3	3	4	3	3	3	4	2	3	3	3	3	3	2	3	4	3	4	3	3	3	3	3	2	2	2	3	3	3	100	3	3	2	2	3	2	2
1	4	2	2	2	0	1	0	3	3	2	4	2	2	3	3	3	2	3	3	2	3	2	3	2	2	2	2	3	3	2	2	3	2	3	3	1	4	3	3	3	3	89	2	1	2	2	1	2	1
2	2	3	1	2	0	1	0	3	3	3	3	3	2	3	3	3	2	3	3	2	3	3	3	3	2	3	3	3	3	3	3	2	2	3	3	3	3	2	3	2	3	94	1	2	2	2	1	1	1
2	2	2	1	2	0	1	0	2	3	3	2	3	3	3	3	3	2	2	3	2	3	2	3	3	3	2	3	3	2	2	4	3	3	2	2	3	3	3	3	3	3	92	2	2	2	2	3	1	2
2	3	1	2	2	0	1	0	3	3	4	2	3	3	3	2	3	3	3	3	3	3	3	3	3	2	3	2	2	3	4	2	4	2	2	2	3	3	3	3	2	4	96	4	3	3	3	3	4	4
2	2	2	1	2	0	1	0	3	2	3	2	2	1	2	2	2	1	2	2	2	3	2	3	3	3	3	2	3	2	2	2	3	2	3	1	2	3	2	2	2	3	77	3	2	3	3	2	3	3
2	3	1	2	2	0	1	0	2	2	3	3	2	2	2	3	3	1	2	2	2	2	3	2	1	2	1	2	2	3	2	3	3	2	2	2	2	3	2	3	2	2	75	3	3	3	3	4	3	4
2	4	3	2	2	1	0	0	3	2	2	2	2	3	2	2	3	3	3	2	2	2	3	1	2	2	1	3	2	1	2	2	2	2	2	2	2	2	2	2	1	2	71	3	3	3	3	4	3	3
1	3	1	1	2	1	0	0	2	3	2	2	3	2	3	3	2	3	3	2	2	3	3	2	3	3	3	3	2	2	2	2	3	2	3	2	2	3	3	2	2	3	85	2	2	3	3	3	2	2
1	3	2	1	2	1	1	0	2	4	2	1	3	3	3	2	3	4	2	2	4	2	3	3	2	3	2	2	3	3	3	2	3	3	3	2	3	3	2	2	3	2	89	3	3	3	3	4	4	3
2	3	1	1	2	1	1	0	2	2	3	3	2	2	3	3	2	3	3	2	3	3	3	2	2	3	3	2	2	3	1	2	3	3	2	3	2	3	2	3	3	3	86	1	1	1	2	1	2	1
2	3	2	2	2	1	1	0	3	2	3	2	3	2	3	3	2	3	2	2	3	3	3	3	2	2	3	4	2	3	2	3	2	3	3	3	3	3	2	2	3	2	89	1	3	2	1	2	2	2
1	2	1	1	2	0	0	1	3	3	2	3	4	3	3	2	2	2	3	3	3	2	3	3	2	3	3	2	3	3	4	3	3	3	3	4	4	3	3	3	3	3	99	2	1	1	2	2	2	3
1	2	3	1	2	0	0	1	3	2	2	3	3	1	3	3	3	3	3	3	3	2	3	3	2	2	3	3	2	3	3	2	3	3	2	3	3	3	4	2	2	3	91	2	3	2	2	3	1	1
1	1	1	1	2	0	0	1	3	3	3	2	2	3	3	3	3	3	2	2	2	2	3	3	3	1	3	2	2	3	3	3	3	3	2	3	4	2	2	2	3	3	89	2	3	3	3	3	2	3
1	4	1	2	2	0	0	1	3	3	3	2	3	2	2	4	3	3	2	3	2	3	3	3	4	3	2	3	3	3	3	3	3	3	2	3	3	2	3	2	3	3	95	3	4	4	4	3	3	3
2	4	3	2	2	0	0	1	3	3	2	3	2	3	3	2	2	2	2	3	3	2	2	3	2	3	3	3	3	3	2	3	2	3	3	2	3	2	3	2	3	3	88	4	4	4	4	4	4	4
2	2	3	1	2	0	1	1	3	3	3	3	3	3	2	2	3	2	2	2	2	3	2	3	2	2	3	2	2	2	2	2	4	2	3	3	3	3	3	2	2	3	86	4	4	4	4	4	4	4
2	3	3	2	2	0	1	1	2	2	3	3	3	3	2	2	2	2	3	2	3	3	3	2	3	3	3	2	2	2	3	3	2	2	2	2	3	2	2	3	2	3	84	3	3	3	3	2	3	3
2	3	1	2	2	0	1	1	3	3	3	3	4	3	3	4	3	4	2	3	3	3	3	3	3	3	3	3	3	3	3	4	2	3	4	2	3	2	3	3	3	3	103	2	2	4	3	1	1	2
1	3	3	2	2	0	1	1	4	2	3	3	4	3	3	3	3	3	3	4	4	2	3	2	3	3	3	2	3	3	3	4	3	3	3	3	2	3	2	3	3	3	101	4	3	3	3	2	2	3
1	3	1	1	2	0	1	1	3	2	2	3	3	3	2	2	1	3	3	2	3	3	2	2	2	2	2	3	3	3	3	3	2	3	2	2	3	3	2	2	3	2	84	3	2	2	3	3	2	3
1	3	2	2	2	0	1	1	3	3	2	3	4	3	3	3	3	3	4	3	2	3	3	3	2	3	5	3	3	2	2	2	3	3	3	3	3	2	3	2	3	3	98	2	2	2	1	2	3	2
1	2	3	2	2	1	1	1	3	3	3	2	3	3	3	3	2	3	2	4	2	3	3	3	3	3	2	3	3	3	3	3	3	3	3	2	3	2	2	2	2	3	93	2	2	3	2	3	3	3
1	2	1	2	2	1	1	1	2	2	2	2	1	1	3	1	3	1	2	2	1	2	2	2	2	1	2	2	2	2	2	3	2	2	1	2	3	2	1	2	2	3	65	3	3	2	3	3	2	4
2	4	1	2	3	1	1	1	2	2	2	2	1	3	2	2	3	2	2	3	3	2	2	2	1	2	2	3	2	2	2	2	1	2	1	2	2	2	2	2	2	3	70	3	2	2	3	1	2	3
1	4	3	1	1	0	0	0	3	3	3	2	2	2	3	3	3	3	2	3	2	2	3	3	2	2	2	3	2	3	3	2	2	2	2	3	2	2	3	2	2	3	84	3	3	3	3	3	3	3
2	2	3	2	1	0	0	0	2	3	2	3	2	2	2	2	2	2	2	2	3	2	3	3	3	2	3	2	2	2	3	2	3	2	3	3	3	1	2	3	3	2	81	2	2	1	2	2	2	2
1	2	2	1	3	0	0	0	2	3	2	2	2	2	2	2	3	3	2	2	1	2	1	3	2	2	2	2	2	3	2	2	1	2	2	2	1	1	3	2	2	3	70	3	3	3	3	2	3	2
2	1	1	1	3	0	0	0	2	2	3	2	2	3	2	3	3	3	3	3	3	3	3	2	2	3	2	2	2	2	3	3	3	2	2	3	2	3	3	3	2	2	86	4	4	3	4	4	4	4
2	3	3	1	2	0	0	0	3	4	3	3	3	4	3	3	3	2	2	3	3	3	3	2	3	2	3	4	4	3	2	3	2	2	3	4	2	3	2	2	2	3	96	2	2	2	2	1	1	2
2	2	2	1	2	0	0	0	2	2	2	2	3	2	3	2	2	2	2	3	2	3	3	2	3	2	2	2	2	3	3	2	3	1	2	2	2	2	2	3	2	2	77	2	2	3	2	2	3	3
1	4	1	1	2	0	0	0	2	2	2	2	2	3	2	2	2	2	3	3	2	3	1	2	3	3	2	3	2	2	2	2	2	2	2	2	3	2	2	1	3	2	75	2	2	2	3	3	2	3
1	1	1	1	2	0	0	0	3	3	4	3	4	4	4	3	5	4	3	4	4	3	4	3	3	4	4	4	3	4	4	3	3	3	4	3	3	4	3	3	4	3	120	2	3	3	2	3	3	3
1	2	2	2	2	0	0	0	3	3	3	3	3	3	3	3	3	2	3	3	2	3	2	3	3	4	3	2	2	2	3	2	2	3	3	3	3	2	3	4	4	4	97	4	3	3	3	3	4	3
1	1	1	2	2	0	0	0	2	2	3	2	2	3	2	3	2	1	2	3	2	3	2	3	2	3	3	1	1	3	2	2	2	3	2	3	3	2	3	2	2	3	79	2	1	3	3	3	2	2
1	2	2	2	1	0	1	0	2	3	2	2	3	2	2	3	3	3	2	3	3	1	2	3	2	2	3	3	2	3	3	3	4	2	2	3	3	2	3	3	3	3	88	4	4	4	4	4	4	4
2	1	3	1	3	0	1	0	2	2	2	1	2	1	2	3	3	3	2	3	2	4	2	2	2	2	1	2	3	3	3	1	2	2	3	3	2	1	2	2	2	3	75	3	3	3	2	3	2	2
1	1	2	1	3	0	1	0	3	3	2	3	3	3	2	3	3	2	2	3	2	2	2	2	3	3	3	3	2	1	3	3	3	3	3	2	3	2	3	2	2	3	87	2	2	2	3	2	2	3
1	3	2	2	3	0	1	0	3	4	2	2	3	2	2	2	2	3	3	2	3	2	2	3	2	2	3	3	2	2	2	2	1	2	1	2	2	2	2	3	2	2	77	3	3	4	2	3	2	3
1	2	1	2	3	0	1	0	3	3	2	3	2	3	3	3	3	4	3	3	2	2	3	2	2	4	2	3	2	3	2	3	3	3	3	3	3	3	3	3	3	3	95	3	3	2	1	1	3	2
2	2	3	1	2	0	1	0	3	3	3	2	3	3	3	3	3	3	4	3	2	3	3	2	3	3	3	3	2	2	3	2	4	3	3	4	3	2	3	3	3	2	97	2	2	1	0	2	2	2
2	2	2	2	2	0	1	0	4	3	3	3	3	3	3	2	3	3	2	3	1	3	2	3	3	3	3	3	3	3	3	3	3	2	3	2	3	2	3	3	3	3	95	4	4	3	4	3	4	4
1	3	2	2	2	0	1	0	2	3	3	3	3	3	4	4	2	2	3	3	2	2	3	3	3	3	3	2	3	2	3	3	3	3	3	3	3	2	3	3	3	3	96	2	3	2	3	2	2	2
2	2	1	2	2	0	1	0	3	3	2	2	3	3	3	3	2	3	3	2	2	3	3	3	3	3	2	2	4	3	3	2	2	2	1	3	3	3	3	2	3	2	89	3	4	3	4	3	3	4
1	3	1	2	3	1	0	0	2	2	2	3	2	2	2	2	2	2	2	3	3	3	2	2	2	2	3	3	2	3	3	1	2	2	2	2	3	3	2	2	3	3	79	2	3	3	4	3	4	3
1	1	3	2	2	1	0	0	2	3	3	3	3	3	1	2	2	2	3	3	2	2	3	3	3	2	3	4	2	3	3	3	3	3	2	3	2	2	3	3	3	2	89	2	2	2	2	1	2	2
1	3	1	2	2	1	0	0	3	3	3	3	3	2	2	4	2	3	3	3	2	3	1	2	3	2	2	2	3	3	3	2	4	3	3	3	3	3	3	3	3	2	92	2	2	3	2	3	2	2
1	3	3	1	2	1	1	0	3	2	3	3	3	3	2	3	2	3	3	3	2	2	2	2	2	3	2	3	3	1	3	2	3	3	3	3	3	2	3	2	2	3	87	3	3	2	4	2	3	3
1	4	1	2	2	1	1	0	2	2	1	2	2	1	2	2	3	1	3	2	2	2	3	2	2	1	2	2	2	2	2	2	3	3	3	2	2	3	3	3	2	3	74	4	4	4	4	4	4	3
2	3	3	2	1	0	0	1	2	4	2	3	3	3	3	3	3	4	3	2	3	3	3	3	2	2	3	3	3	3	3	3	4	3	2	3	3	3	3	3	3	3	99	3	3	4	4	3	3	4
2	3	2	2	3	0	0	1	3	3	1	2	2	2	2	2	2	2	1	2	2	3	2	1	3	2	1	3	3	2	2	3	2	2	2	3	1	3	2	2	3	3	74	1	2	2	2	1	2	2
1	3	3	2	2	0	0	1	3	2	2	3	2	3	3	3	3	3	3	3	2	2	3	3	2	2	3	4	2	4	2	3	1	2	3	3	2	2	4	3	2	3	90	3	3	2	1	1	1	2
1	3	2	2	3	0	1	1	2	3	3	2	3	3	3	2	2	3	2	2	4	3	3	2	3	2	3	2	3	2	2	2	2	1	3	4	2	3	2	3	2	2	85	3	3	2	1	3	3	3
2	3	2	2	1	0	0	0	2	2	3	2	2	2	2	3	2	2	2	3	2	2	1	2	2	2	2	2	2	2	2	2	2	2	2	2	2	2	1	2	2	2	69	3	3	2	4	2	3	2
2	3	2	1	3	0	0	0	2	3	2	2	3	3	2	2	3	2	2	2	2	3	2	1	3	2	3	3	2	3	2	2	2	2	3	2	3	3	3	1	3	2	80	3	3	4	4	4	4	3
2	3	3	2	2	0	0	0	2	2	2	2	2	1	2	2	2	3	1	2	2	2	1	1	1	1	2	2	2	3	2	1	1	1	1	2	1	2	3	2	2	1	59	3	4	3	4	3	4	3
1	3	2	2	2	0	0	0	3	3	3	3	2	3	3	3	2	3	3	3	2	4	2	2	2	3	3	4	3	3	1	3	2	3	3	3	3	3	3	2	2	2	92	3	3	2	3	4	3	3
1	3	2	2	2	0	0	0	2	1	3	2	1	1	3	2	2	2	2	2	2	3	1	2	3	2	2	2	2	2	3	3	3	2	2	2	1	2	1	2	3	2	70	4	4	3	4	4	4	3
1	3	1	2	2	0	0	0	3	2	2	4	2	4	3	3	3	3	3	2	3	4	3	3	2	2	3	2	3	3	2	2	3	3	2	2	2	2	2	3	4	2	91	3	3	3	3	3	3	3
2	3	2	1	1	0	1	0	3	3	3	3	4	2	2	3	2	3	3	4	2	3	3	3	2	3	3	3	2	3	3	3	2	3	3	3	3	2	3	3	3	4	97	3	2	3	2	2	2	1
1	3	3	2	1	0	1	0	3	3	3	2	2	2	3	2	3	3	3	2	3	3	2	2	2	2	2	3	3	3	3	2	3	2	2	2	3	3	2	3	3	2	86	3	2	2	3	3	2	2
2	3	3	2	1	0	1	0	3	2	2	3	3	2	2	3	2	2	2	1	2	3	2	2	2	2	2	2	2	2	3	2	1	3	3	3	2	2	3	3	2	2	77	2	2	2	3	2	2	2
2	3	1	2	3	0	1	0	2	3	4	2	2	2	3	3	3	2	2	3	3	4	2	2	2	2	2	3	2	3	3	2	2	2	2	2	2	3	2	2	3	3	84	4	4	4	3	3	2	4
1	3	2	1	2	0	1	0	3	3	3	3	3	3	2	3	3	3	3	3	3	2	3	3	3	3	3	4	3	3	4	3	4	3	3	3	3	4	3	3	3	3	104	1	1	1	2	2	2	1
2	3	3	2	2	0	1	0	3	2	3	3	3	2	2	3	2	3	3	4	3	2	3	3	2	2	3	3	3	2	3	2	3	3	3	2	2	3	2	2	2	3	89	3	3	3	3	3	3	2
1	3	3	2	2	0	1	0	4	2	3	2	3	3	2	3	2	4	2	3	3	2	2	3	3	4	4	3	3	3	3	3	4	3	3	2	3	3	2	2	3	2	96	2	1	3	3	3	3	3
1	3	1	2	2	0	1	0	2	2	4	3	3	3	4	3	3	3	3	2	4	3	4	3	2	3	3	3	3	3	3	3	3	4	3	3	3	3	3	3	2	3	102	2	2	3	2	3	2	2
1	3	1	2	2	0	1	0	3	4	3	2	2	3	2	3	2	3	3	2	3	2	3	2	3	3	4	3	3	3	3	2	3	3	3	2	3	1	3	3	3	2	92	3	2	2	2	2	2	2
2	3	1	2	2	0	1	0	2	3	2	3	3	2	3	2	3	3	3	2	2	3	2	2	2	2	3	3	3	3	3	3	2	2	3	2	2	2	3	3	2	2	85	3	3	3	3	3	2	3
1	3	2	1	3	1	0	0	3	3	3	3	3	3	3	3	4	2	3	2	3	3	3	3	3	3	3	3	3	3	3	3	3	2	3	2	2	4	4	3	3	3	100	2	3	2	3	2	3	2
2	3	2	2	3	1	0	0	2	2	2	1	3	3	2	2	2	3	3	2	3	3	3	2	3	2	3	3	2	3	3	3	2	2	3	2	3	2	3	3	2	2	84	3	3	3	3	3	3	4
2	3	2	1	2	1	0	0	3	4	2	3	3	3	3	3	3	2	4	3	2	3	3	3	2	3	3	2	3	3	3	3	3	3	3	3	3	2	3	2	3	3	97	3	2	3	1	3	3	2
2	3	1	1	2	1	0	0	3	2	2	2	3	3	2	2	3	2	1	2	3	2	2	2	2	2	2	3	2	3	3	2	2	2	2	3	3	2	3	4	3	3	82	2	2	2	3	3	3	3
2	3	3	1	1	1	1	0	1	3	2	2	3	2	2	3	2	2	3	2	2	2	3	2	3	3	2	3	3	3	3	3	2	3	3	2	3	2	2	2	2	3	83	4	4	4	4	3	4	4
1	3	1	1	1	1	1	0	3	2	2	2	1	2	2	3	2	2	3	2	2	1	2	2	3	1	2	3	2	2	2	1	2	2	2	2	2	2	2	2	1	1	67	2	2	3	3	2	3	4
2	3	2	2	1	1	1	0	3	2	2	2	2	2	2	2	2	1	2	3	3	2	2	3	2	3	2	3	3	2	3	2	2	3	3	2	2	3	2	2	2	2	78	3	3	2	3	3	3	3
1	3	3	1	3	1	1	0	3	3	3	3	3	3	2	3	3	2	3	2	3	3	3	1	3	2	3	3	3	2	3	3	2	3	4	3	3	3	3	3	3	2	94	4	3	3	3	4	4	4
2	3	2	2	3	1	1	0	2	3	3	3	3	3	3	2	3	3	3	3	2	3	2	3	3	3	3	3	3	2	3	2	2	2	2	4	3	3	2	2	2	3	91	4	3	3	4	3	3	4
1	3	2	1	2	1	1	0	3	3	2	2	2	3	3	3	2	2	2	2	3	2	3	2	3	2	2	3	2	2	3	2	3	1	2	2	2	3	2	2	3	2	80	1	2	2	1	2	1	3
1	3	3	2	2	1	1	0	2	3	3	2	3	3	3	2	2	4	2	3	2	3	3	2	4	3	3	3	4	3	3	3	2	2	2	4	2	2	2	3	2	2	91	3	4	4	4	3	4	2
2	3	1	1	1	0	0	1	2	2	3	2	2	3	2	2	2	3	2	3	2	3	2	2	3	2	2	3	2	3	3	2	2	3	3	2	2	2	3	2	3	2	81	3	3	3	3	2	3	2
1	3	1	1	3	0	0	1	3	3	2	3	2	3	4	3	3	4	3	3	3	3	3	2	2	3	2	3	3	2	2	2	2	2	3	3	2	3	3	2	3	2	91	2	2	3	3	3	3	3
2	3	1	1	3	0	0	1	2	2	2	2	2	2	3	3	2	2	3	2	3	2	2	2	3	2	2	2	2	2	2	1	2	3	3	2	2	3	3	3	2	1	76	2	2	3	2	2	2	3
1	3	1	2	3	0	0	1	3	2	2	2	3	1	3	3	2	2	1	3	3	2	1	1	1	2	2	2	3	2	2	4	2	3	2	3	2	3	2	2	1	2	74	2	3	3	3	3	2	4
2	3	1	2	2	0	0	1	3	3	3	3	3	3	2	4	4	2	2	2	3	4	3	4	3	3	3	3	3	2	3	3	3	3	2	2	3	4	3	3	3	2	99	2	3	3	2	3	4	4
1	1	3	2	1	0	1	1	4	3	3	3	2	3	3	4	4	3	2	3	3	2	2	4	3	3	3	2	3	2	3	4	3	3	3	2	3	2	2	2	3	3	97	3	3	3	2	2	3	3
2	1	1	2	1	0	1	1	2	2	3	2	3	3	2	2	3	2	3	2	2	3	2	2	3	4	3	3	3	2	2	3	2	2	2	3	2	3	2	2	2	2	83	2	2	1	3	2	3	2
2	1	1	2	1	0	1	1	3	3	3	3	3	3	3	3	3	3	3	2	3	3	3	3	3	3	3	2	2	3	3	3	2	3	3	3	3	3	3	2	4	3	98	2	2	4	3	2	2	2
1	4	3	1	3	0	1	1	3	3	3	2	3	3	3	2	3	3	3	3	3	3	3	3	2	2	3	3	3	3	3	4	3	3	3	3	3	3	3	3	3	2	98	4	4	3	4	4	4	4
2	2	2	1	3	0	1	1	2	3	3	3	2	3	3	3	3	3	3	2	3	3	2	3	3	2	2	3	2	3	2	3	2	3	3	2	3	2	3	3	2	2	89	4	3	3	3	3	3	2
1	1	1	2	2	0	1	1	3	3	3	1	3	2	3	3	2	3	3	3	1	3	3	3	3	2	2	2	2	2	2	3	3	2	2	2	3	3	3	3	2	2	85	3	3	3	4	3	3	2
2	4	2	2	3	1	0	1	3	3	3	3	3	4	2	2	3	3	4	3	4	3	3	4	3	2	2	3	4	4	2	4	3	2	3	4	3	3	3	4	2	3	104	3	3	4	3	3	3	2
2	4	3	2	2	1	0	1	2	2	3	3	3	3	3	2	4	2	3	2	3	3	3	3	4	3	2	4	3	3	2	3	3	3	3	2	2	2	2	3	3	2	93	3	3	2	2	2	3	3
1	3	1	2	2	1	0	1	3	3	3	3	3	3	3	3	3	3	3	4	3	3	3	3	4	3	2	3	4	3	4	3	3	3	3	4	4	4	3	4	3	4	110	3	2	3	3	3	3	2
2	4	1	2	2	1	0	1	3	3	2	2	3	2	3	1	3	2	3	3	2	2	3	3	4	3	2	2	2	3	3	2	3	3	2	3	2	3	2	2	3	2	86	2	4	2	2	2	2	3
2	3	3	2	3	1	1	1	2	3	3	3	3	3	2	2	2	3	2	3	3	3	3	2	3	3	2	3	2	2	2	2	2	2	3	2	3	2	3	2	3	2	85	2	3	2	3	3	2	3
2	1	2	1	1	0	0	0	2	2	2	2	2	3	3	3	2	3	1	2	3	2	2	2	2	1	2	2	3	3	2	2	2	2	2	2	3	2	3	3	2	3	77	2	3	3	3	2	3	3
2	3	2	2	1	0	0	0	2	2	2	2	3	3	3	2	1	2	2	2	2	3	2	3	1	2	3	2	2	2	2	2	3	2	2	2	2	3	2	2	2	2	74	2	3	1	2	2	3	2
2	1	2	2	1	0	0	0	3	3	2	1	2	3	1	3	3	3	3	3	3	2	2	3	3	3	2	2	2	3	3	2	3	3	3	2	2	2	3	3	2	2	85	3	3	2	2	2	3	3
1	3	2	2	3	0	0	0	3	3	3	3	2	2	3	2	3	3	3	2	2	2	4	3	3	2	3	2	3	2	2	2	3	3	3	2	2	3	2	2	3	2	87	3	3	2	3	3	3	2
1	1	1	2	3	0	0	0	3	3	2	3	3	3	3	3	3	3	2	4	3	2	4	3	3	2	2	4	3	3	3	3	3	3	3	3	2	3	3	3	3	4	100	3	2	3	2	2	1	3
1	3	2	2	2	0	0	0	3	3	3	3	2	3	3	3	3	2	3	3	3	4	2	2	3	3	3	3	3	3	3	3	3	3	4	2	3	3	3	3	3	3	99	3	2	3	1	2	4	2
2	2	1	2	2	0	0	0	3	2	2	3	3	2	2	3	3	2	4	3	2	3	3	3	3	3	3	2	2	3	2	3	3	2	1	4	3	2	3	3	2	3	90	2	2	2	2	3	3	2
2	3	1	2	2	0	0	0	2	1	1	2	2	2	3	3	2	2	2	3	3	2	2	3	3	3	3	4	3	3	3	1	2	2	2	2	2	2	4	2	2	2	80	3	3	2	3	2	2	2
1	4	1	2	2	0	0	0	3	3	3	2	4	2	3	4	3	3	3	2	3	2	3	2	3	4	3	3	2	4	2	3	3	2	3	3	4	3	3	4	2	3	99	3	3	2	2	2	2	1
1	3	1	1	1	0	1	0	2	2	3	2	2	1	3	2	3	2	2	2	3	3	2	2	2	3	2	2	2	3	3	3	2	1	2	2	2	2	2	3	4	3	79	3	3	3	4	2	3	3
1	1	3	2	3	0	1	0	2	3	3	3	3	3	3	3	3	4	3	3	3	2	3	3	3	3	4	3	3	4	4	4	3	2	3	4	3	3	3	3	4	3	106	2	3	3	3	4	3	3
1	1	3	1	2	0	1	0	3	3	2	2	3	2	3	4	3	3	2	3	3	2	2	4	3	4	3	3	3	3	3	3	3	3	3	3	3	3	2	2	2	3	96	2	2	3	3	4	3	3
2	3	1	1	2	0	1	0	3	2	2	4	3	3	2	3	3	2	4	3	3	3	3	3	3	2	3	2	3	2	1	3	3	3	2	2	2	3	3	3	3	3	92	2	2	2	3	3	2	2
1	3	3	2	2	0	1	0	3	3	2	2	2	4	3	3	3	2	3	2	3	3	3	2	3	2	2	2	3	3	3	3	2	2	3	3	2	4	3	2	3	3	91	3	3	3	3	3	3	4
2	3	3	2	2	0	1	0	3	4	3	3	2	3	2	3	3	2	3	3	2	2	3	3	2	2	3	3	2	3	3	3	3	3	3	3	3	3	3	3	4	3	96	3	4	4	4	3	4	3
1	2	2	2	1	1	0	0	2	2	3	2	2	2	3	2	2	2	1	3	3	2	2	3	2	2	2	2	2	3	3	2	2	3	2	3	2	2	2	2	3	3	78	3	3	4	3	3	2	4
1	3	2	2	1	1	0	0	3	2	3	3	3	3	2	3	1	3	3	3	2	3	2	2	3	3	1	3	3	2	2	3	3	2	2	3	2	3	2	2	2	3	85	3	4	3	4	4	4	3
1	2	3	2	3	1	0	0	3	2	3	2	3	3	3	2	2	4	4	3	2	3	3	3	2	2	4	3	3	3	2	3	3	2	3	2	4	4	2	2	2	3	94	3	3	2	3	2	3	2
2	4	3	1	2	1	0	0	2	3	1	2	2	2	3	4	3	2	3	3	4	3	2	3	3	2	3	2	3	3	2	4	3	3	2	2	3	2	2	2	4	3	90	4	3	3	3	3	3	4
2	4	2	1	2	1	0	0	2	3	2	3	3	2	3	3	2	2	3	2	2	2	2	2	3	3	3	3	3	2	3	3	3	2	3	2	2	2	2	2	2	2	83	3	2	4	3	2	2	3
1	1	1	1	2	1	0	0	2	3	2	2	3	2	2	2	2	3	3	3	2	3	3	3	4	2	2	3	2	2	3	2	2	2	3	3	2	2	2	2	2	3	83	3	3	2	3	2	3	3
1	3	3	1	1	1	1	0	4	3	4	3	3	2	3	2	3	2	3	2	3	3	2	4	3	3	3	3	2	3	2	3	4	3	4	4	3	3	3	3	4	4	103	2	3	2	2	2	1	2
1	4	2	2	1	1	1	0	3	3	3	3	3	2	3	2	3	3	3	3	3	2	3	3	4	3	3	3	3	4	3	3	3	2	3	3	3	3	3	3	3	2	99	2	1	2	2	1	2	1
1	1	2	2	3	1	1	0	4	3	3	3	3	3	2	3	4	3	3	3	3	4	3	3	3	2	3	4	4	3	4	3	4	2	4	3	2	3	3	3	3	3	106	4	3	3	3	2	4	3
2	3	3	1	1	0	0	1	2	3	2	3	2	2	3	2	2	2	3	2	2	2	3	2	2	3	3	2	3	3	3	3	2	2	2	2	3	2	2	2	3	2	81	3	4	4	3	4	4	4
2	2	2	2	1	0	0	1	2	3	3	2	3	3	3	2	3	3	2	3	3	3	3	2	2	2	2	2	2	3	2	2	3	3	3	2	2	3	2	2	3	4	87	4	3	3	4	3	3	3
2	3	1	2	1	0	0	1	2	3	2	3	3	2	3	2	2	2	3	2	3	2	3	3	3	2	2	3	2	2	3	3	3	3	3	2	3	2	2	3	3	2	86	3	3	2	3	2	2	2
2	1	1	2	1	0	0	1	1	2	3	2	2	1	2	1	3	2	1	2	2	2	2	1	2	2	3	3	2	2	2	2	2	2	2	2	2	3	2	3	3	2	70	2	3	2	3	2	1	3
2	2	3	1	3	0	0	1	2	3	2	3	2	2	3	3	3	2	3	3	3	3	3	3	3	3	2	3	3	3	2	3	2	2	2	2	2	2	2	2	3	1	85	3	3	3	3	2	3	3
2	2	2	2	2	0	0	1	2	3	2	2	3	3	2	2	4	3	3	2	2	2	2	3	3	2	2	2	2	2	2	2	3	4	3	3	3	3	2	2	3	3	86	3	3	3	3	3	3	2
1	3	2	2	2	0	0	1	2	3	2	3	3	2	2	3	2	3	3	3	2	3	3	2	1	2	3	2	2	2	2	2	2	3	2	2	2	2	3	3	2	2	80	2	2	2	3	3	3	3
2	2	2	1	1	0	1	1	2	2	2	3	3	2	3	3	2	2	3	2	2	3	3	3	2	2	3	3	3	2	2	2	3	2	3	3	2	2	3	2	3	3	85	3	3	4	2	3	3	3
2	4	1	1	3	0	1	1	3	2	4	3	2	2	3	3	3	3	2	4	2	3	2	3	3	3	4	3	2	3	3	3	2	2	3	2	2	3	3	3	4	2	94	3	1	2	3	3	3	2
1	4	2	1	2	0	1	1	2	1	2	2	2	2	2	2	3	3	3	2	3	2	3	3	2	3	2	2	2	2	2	1	2	2	2	2	2	1	2	2	2	1	71	2	3	3	3	2	3	3
2	4	1	2	2	0	1	1	3	2	4	3	2	3	3	2	3	3	2	3	4	2	3	3	3	3	3	4	3	3	3	2	4	3	2	3	3	3	3	2	3	3	98	3	3	3	3	2	2	3
1	2	3	2	1	1	0	1	3	4	3	4	3	3	2	2	4	3	3	3	3	3	3	3	3	3	3	4	3	3	3	3	3	3	3	3	3	2	3	4	2	2	102	3	3	3	3	3	3	3
2	1	3	1	3	1	0	1	3	3	3	2	2	2	2	2	2	3	2	2	3	2	3	2	3	3	2	2	3	3	3	3	3	3	3	3	3	2	3	2	3	2	87	4	4	4	4	3	3	4
2	2	1	1	3	1	0	1	3	3	3	2	3	2	2	3	2	3	3	3	3	3	3	2	3	2	3	2	3	4	1	3	2	2	3	2	3	4	3	3	4	3	93	1	2	2	2	1	1	1
1	2	2	2	2	1	0	1	2	1	4	3	2	3	1	2	1	2	2	2	2	3	1	3	2	2	3	1	2	3	3	2	2	2	2	2	3	3	3	3	2	2	76	3	4	4	3	4	3	4
2	3	1	2	2	1	1	1	2	3	3	2	2	3	3	2	3	2	3	2	3	3	3	3	3	3	3	3	2	3	3	3	3	2	2	3	3	3	3	2	2	2	90	4	3	3	3	3	4	3
2	1	2	1	1	0	0	0	3	3	3	3	3	3	3	3	3	3	3	3	3	3	3	3	3	3	4	3	2	4	3	3	3	4	3	4	3	2	2	1	3	3	101	2	2	1	2	2	2	2
1	2	2	2	1	0	0	0	3	2	1	3	3	3	2	2	3	3	2	2	3	3	3	3	3	3	3	3	3	3	3	4	3	3	2	3	3	3	4	2	3	2	94	2	2	2	2	1	2	1
2	2	2	2	1	0	0	0	3	3	2	3	2	3	2	2	3	3	3	3	2	2	4	2	3	3	3	3	2	3	3	3	4	3	3	3	3	2	3	3	2	3	94	3	3	2	2	2	3	3
2	3	1	2	1	0	0	0	2	2	2	2	3	2	2	2	3	3	4	3	3	2	2	3	2	3	2	2	2	3	2	2	2	3	3	3	3	1	3	2	2	3	83	2	2	2	1	2	2	2
2	2	3	2	3	0	0	0	4	3	3	3	3	4	3	4	3	3	4	3	3	3	3	3	4	2	3	3	4	3	3	3	4	4	3	3	3	4	3	3	3	3	110	2	2	2	2	2	2	1
1	3	2	1	2	0	0	0	2	3	2	3	3	3	3	2	3	2	4	3	3	3	3	3	2	3	2	3	3	2	3	3	2	2	3	3	3	2	4	3	2	2	92	3	4	4	3	3	3	3
1	4	2	2	2	0	0	0	3	3	2	3	3	3	3	3	3	3	2	1	2	3	3	2	2	3	2	2	3	3	3	2	3	3	3	2	3	3	2	2	3	3	89	3	3	3	4	4	3	4
1	1	2	2	2	0	0	0	2	2	2	1	2	2	3	3	3	2	3	2	3	3	2	2	3	3	3	3	2	2	4	3	3	3	1	3	2	2	2	2	3	2	83	1	3	3	2	2	2	2
2	1	2	2	2	0	0	0	2	2	2	3	1	3	2	3	2	3	2	3	2	2	2	2	2	2	3	2	2	2	2	3	2	3	1	2	2	2	2	2	3	2	75	3	3	2	3	3	2	2
2	3	1	2	2	0	0	0	2	2	2	2	2	2	4	3	3	3	3	3	3	3	4	3	2	3	3	2	3	3	2	3	4	3	3	4	3	3	2	3	4	3	97	3	2	2	2	1	3	2
2	4	2	2	1	0	1	0	2	2	2	2	1	2	2	2	2	2	2	2	2	2	2	2	2	2	1	2	3	2	2	3	3	2	2	3	2	2	2	2	3	2	71	4	4	4	4	4	4	4
2	1	2	2	1	0	1	0	3	3	2	3	2	3	2	3	2	2	2	3	2	3	2	3	3	3	2	3	3	3	3	2	4	3	2	2	2	3	3	3	3	2	89	2	3	3	4	4	3	3
1	3	3	1	2	0	1	0	3	2	2	3	3	3	2	2	4	2	3	3	3	1	2	3	4	4	3	3	3	4	3	2	3	3	2	3	2	3	2	3	3	2	93	3	4	3	4	3	4	4
1	4	3	2	2	0	1	0	2	3	3	2	2	3	2	3	3	1	2	3	2	2	3	2	1	3	2	2	3	3	3	3	2	3	3	3	2	3	2	2	3	3	84	3	2	2	2	3	3	2
1	2	2	1	2	1	0	0	2	2	3	3	3	2	2	2	2	2	2	2	2	3	3	3	3	3	2	3	3	3	4	3	2	2	3	2	2	2	2	2	3	3	85	2	3	2	3	3	4	2
2	1	1	1	2	1	0	0	1	3	2	3	2	3	3	3	3	3	3	3	3	3	3	4	3	2	2	2	3	3	3	4	3	3	2	3	2	2	2	3	3	3	93	1	1	1	1	2	1	2
2	4	1	2	2	1	0	0	1	2	1	2	2	3	3	2	3	2	2	2	2	2	2	2	3	3	3	3	2	2	2	3	3	3	1	2	2	2	2	2	3	1	75	3	3	3	3	4	3	4
1	2	1	2	1	1	1	0	3	2	4	3	3	2	2	2	2	3	3	2	3	3	3	3	3	2	3	3	1	2	2	2	2	2	3	2	2	3	3	3	3	3	87	3	3	3	2	2	2	2
2	2	1	2	1	1	1	0	3	3	2	3	3	2	2	1	3	3	2	3	1	2	2	2	2	3	2	2	2	1	3	2	2	1	3	2	3	2	2	2	3	2	76	4	4	4	4	4	4	3
2	4	1	2	1	1	1	0	3	3	3	3	3	3	2	2	2	3	3	3	2	2	3	3	2	3	2	2	3	2	4	3	3	2	3	3	2	2	3	2	2	1	87	3	3	2	2	3	2	2
1	2	2	1	2	1	1	0	3	2	3	3	3	2	2	3	2	2	2	2	2	2	1	3	3	2	2	2	3	2	3	3	1	4	3	3	2	2	3	2	3	2	82	1	1	1	2	1	1	2
2	3	1	1	1	0	0	1	3	3	3	2	2	3	2	3	2	3	2	2	3	3	4	2	2	3	3	2	3	3	3	3	3	2	2	3	2	2	2	2	3	4	89	3	3	3	3	3	3	3
1	3	3	1	2	0	0	1	2	2	2	3	2	1	2	2	1	3	2	2	2	1	2	2	3	2	3	1	2	2	2	3	2	3	2	2	2	2	2	2	2	2	70	2	2	3	2	3	3	3
1	4	3	2	2	0	0	1	2	2	3	3	3	1	3	2	2	2	2	2	3	2	2	2	2	2	3	3	2	3	3	2	3	3	3	2	2	2	2	2	2	2	79	3	3	3	2	3	3	3
2	2	3	1	3	0	1	1	3	2	3	2	3	3	2	2	2	2	2	2	3	3	2	3	3	2	3	2	3	3	3	3	2	3	2	2	3	2	3	3	2	3	86	2	2	1	2	1	2	1
2	1	3	1	2	1	0	1	3	2	3	2	2	2	3	3	2	2	1	2	2	2	3	3	2	2	2	2	3	2	2	1	2	2	2	2	2	2	1	2	2	2	72	4	4	4	4	3	4	4
2	4	2	1	2	1	0	1	2	3	2	2	2	2	2	2	2	2	2	2	3	2	3	3	2	2	3	3	3	2	2	2	2	2	3	2	2	3	3	3	2	2	79	3	2	3	3	4	3	4
1	1	3	2	2	1	0	1	2	2	1	3	2	2	2	2	2	3	2	2	2	4	2	3	3	3	2	2	3	2	2	2	2	2	3	3	2	3	3	2	2	3	80	3	4	3	4	3	4	4
2	4	1	1	1	0	0	0	2	2	2	3	2	3	3	3	2	3	3	2	3	3	3	3	3	3	3	3	2	3	2	2	3	3	2	3	2	2	2	2	2	3	87	2	2	3	3	3	2	3
1	2	2	2	1	0	0	0	2	2	2	3	1	2	1	2	1	2	1	1	2	2	2	3	3	2	2	3	1	2	2	2	2	1	2	2	2	2	1	3	2	1	64	4	4	3	4	4	4	3
1	3	2	2	1	0	0	0	2	2	3	1	3	2	3	3	2	2	2	3	3	3	2	3	1	3	3	2	2	2	2	2	3	3	3	3	3	3	3	2	2	3	84	3	3	3	3	3	3	4
2	1	1	2	1	0	0	0	3	2	3	3	3	4	3	3	3	3	3	3	3	3	2	3	2	4	3	3	3	4	2	4	4	2	3	2	3	3	3	4	2	3	101	2	2	2	2	2	1	2
2	1	3	1	3	0	0	0	3	3	2	3	3	2	3	3	3	3	3	2	2	3	3	3	3	2	3	3	3	3	2	3	3	2	3	3	3	3	3	2	2	3	93	1	2	3	2	2	2	3
2	2	3	2	3	0	0	0	2	2	2	3	2	3	2	2	2	2	3	4	3	2	3	3	3	2	2	3	1	3	2	3	2	3	3	2	2	2	3	2	3	3	84	3	2	3	3	2	2	2
2	3	2	2	3	0	0	0	2	2	2	1	3	2	2	2	2	2	2	2	2	2	2	2	1	1	1	1	2	1	2	3	1	2	1	1	2	2	2	3	2	2	62	2	2	2	1	2	3	2
1	1	3	1	2	0	0	0	4	2	3	1	2	3	3	2	2	3	3	2	2	2	3	2	2	3	3	3	3	3	3	2	3	3	3	3	2	2	2	2	2	2	85	3	2	2	2	3	3	3
1	1	2	1	2	0	0	0	3	3	2	3	2	3	3	2	3	3	2	2	2	3	3	3	3	2	2	2	3	2	1	3	2	3	2	2	2	3	2	3	3	2	84	3	3	3	3	2	2	2
1	2	1	1	2	0	0	0	2	3	2	2	2	2	2	2	2	2	2	3	2	3	2	2	2	2	2	2	2	3	3	2	3	3	3	3	2	2	2	2	3	3	79	2	3	2	1	2	2	2
2	3	1	1	2	0	0	0	3	2	2	3	3	2	3	3	2	3	3	3	3	2	3	3	2	3	2	3	3	2	4	2	3	2	3	3	2	3	3	2	3	2	90	3	3	4	3	4	3	3
1	2	2	2	2	0	0	0	3	3	3	3	3	3	3	3	3	3	3	3	4	3	3	3	2	3	2	3	3	2	3	3	2	3	2	2	3	2	3	3	4	3	97	3	3	3	4	3	4	3
2	2	2	2	2	0	0	0	2	2	1	3	2	2	2	2	2	2	1	2	2	2	2	3	1	3	1	2	2	2	2	2	4	2	2	1	3	1	3	1	2	2	68	3	4	3	4	3	3	3
2	2	1	2	2	0	0	0	2	3	4	3	3	3	2	2	2	2	2	3	3	2	2	2	2	2	2	2	3	3	3	3	2	3	2	2	2	2	2	3	3	2	83	2	2	2	3	2	2	2
2	4	1	2	2	0	0	0	2	3	3	2	2	3	3	2	3	3	2	3	3	2	3	2	3	3	2	3	3	3	4	3	3	2	2	4	2	2	3	2	2	3	90	2	2	3	2	3	2	3
1	1	1	2	2	0	0	0	2	3	3	3	2	2	3	2	2	2	2	3	2	3	2	2	2	2	3	3	2	3	3	3	1	3	2	3	2	2	2	3	3	2	82	4	4	3	3	3	3	3
2	4	1	2	3	0	1	0	2	3	3	3	3	3	3	3	3	3	3	3	3	2	3	3	3	3	3	3	4	3	4	1	3	3	2	3	3	2	3	3	2	2	96	0	0	0	1	1	1	2
2	3	2	1	2	0	1	0	3	3	2	3	3	2	3	3	3	2	3	3	2	4	2	2	3	3	3	2	4	3	3	2	4	4	3	4	3	3	2	2	3	3	97	1	1	1	2	1	1	2
2	4	3	1	1	1	0	0	3	2	3	2	2	2	2	2	3	2	2	2	1	3	2	2	2	2	2	3	3	2	1	2	2	3	2	2	2	2	3	2	3	1	74	3	3	2	2	2	3	3
2	4	2	2	3	1	0	0	2	2	2	3	3	3	3	2	2	3	3	3	3	3	3	3	3	2	3	3	3	3	3	3	2	3	2	2	3	3	2	3	3	3	92	3	3	3	2	2	3	3
1	3	1	2	3	1	0	0	4	3	3	3	3	3	3	4	3	3	4	2	3	3	4	2	4	3	3	3	2	3	3	3	3	4	4	4	3	2	3	2	3	3	105	3	3	3	3	3	3	3
2	2	1	1	2	1	0	0	3	2	3	3	3	3	3	3	1	2	3	3	3	3	2	3	3	3	3	3	3	3	3	3	3	3	3	2	2	2	3	2	2	3	92	2	3	3	2	2	2	2
1	2	3	2	2	1	0	0	4	3	3	3	3	3	4	3	2	3	3	3	3	4	3	3	3	4	4	4	3	3	3	2	2	4	2	3	3	2	3	4	4	3	106	3	3	4	3	3	4	2
1	3	3	2	2	1	1	0	3	2	3	4	3	4	4	2	2	3	3	3	3	2	3	2	3	3	3	3	3	3	2	3	4	3	3	4	2	3	3	3	3	3	100	3	3	3	3	3	3	4
2	4	3	2	1	0	0	1	3	2	3	3	3	3	3	2	2	4	3	3	3	2	3	2	3	3	3	3	3	4	2	3	3	4	3	3	3	2	3	3	3	3	98	3	2	2	3	2	3	2
2	3	1	1	3	0	0	1	2	3	3	3	2	2	2	3	2	3	3	3	2	2	3	2	3	2	3	2	3	3	2	2	2	3	3	3	3	2	3	3	4	2	88	3	3	2	3	3	2	3
1	2	3	2	3	0	0	1	2	2	2	2	3	2	2	1	2	2	2	2	2	2	1	2	2	2	2	1	3	1	2	2	2	2	2	2	3	2	1	3	3	2	68	3	4	3	3	3	4	3
1	1	2	2	3	0	0	1	2	2	2	2	3	1	2	2	3	2	3	3	3	3	2	2	3	2	2	2	2	2	2	2	3	2	3	2	2	2	1	2	2	2	75	3	2	2	2	3	2	2
1	3	2	2	2	0	0	1	3	2	3	2	2	2	2	2	3	3	2	2	3	2	1	2	3	2	2	2	3	2	3	2	2	3	2	2	2	2	1	2	3	2	76	3	4	3	3	3	2	3
2	3	1	2	2	0	1	1	3	3	3	2	3	3	2	1	2	2	2	2	2	2	2	2	2	1	2	3	2	2	1	2	1	2	2	2	1	2	2	2	3	3	71	3	3	4	3	2	3	3
2	2	1	1	2	1	0	1	2	4	3	2	2	2	2	3	2	4	3	2	2	3	2	3	3	2	2	3	2	2	3	2	2	3	2	2	4	2	2	3	3	2	85	2	2	1	1	1	2	1
1	4	1	1	3	1	1	1	3	3	3	3	3	3	2	2	3	2	2	2	1	3	3	3	3	2	3	2	3	3	2	2	3	3	2	2	3	2	3	2	3	2	86	3	3	4	3	3	3	3
1	3	2	2	3	1	1	1	3	3	2	2	2	3	2	3	3	3	3	2	3	3	2	3	2	3	3	4	3	3	3	3	3	2	1	2	2	3	2	3	3	3	90	3	2	3	2	3	3	3
2	1	3	1	1	0	0	0	2	2	3	2	3	2	3	2	2	2	3	4	4	2	2	3	2	4	3	3	4	3	2	3	4	4	3	2	2	2	3	3	3	2	93	2	2	2	2	2	4	2
2	1	3	2	1	0	0	0	3	2	3	3	2	2	3	2	2	3	3	3	2	3	2	3	3	3	2	2	2	2	4	3	2	3	4	3	3	2	2	2	3	3	89	2	3	3	3	3	3	3
2	2	2	1	3	0	0	0	3	3	3	2	2	2	2	3	3	3	3	3	3	3	2	3	3	3	3	3	3	3	3	4	3	2	2	2	2	2	3	3	3	2	92	3	3	4	3	2	3	3
1	2	3	2	2	0	0	0	3	2	3	3	3	4	2	3	2	2	3	3	3	3	3	2	2	3	3	2	3	3	2	2	3	3	2	3	3	3	3	3	3	3	93	3	3	2	3	2	2	3
1	2	3	2	2	0	0	0	3	2	4	2	3	3	2	2	2	3	3	3	2	3	2	3	3	3	2	4	3	3	2	2	3	2	3	3	2	3	3	3	3	2	91	2	3	2	2	2	2	4
2	3	3	2	1	0	1	0	2	2	2	3	3	2	2	2	3	3	3	2	2	3	3	3	2	2	2	1	3	2	3	2	2	2	2	2	3	3	2	2	3	2	80	4	4	4	3	3	4	3
1	1	3	2	1	0	1	0	2	3	3	2	3	2	1	3	2	3	3	3	3	2	1	3	2	2	2	3	2	2	3	2	3	3	2	2	2	1	3	2	3	2	80	2	2	2	2	2	2	2
1	3	2	1	2	0	1	0	3	2	3	3	1	2	3	2	2	2	3	2	2	2	3	2	4	3	2	1	3	2	2	2	2	3	2	2	4	2	3	3	3	2	82	3	3	4	3	4	3	4
2	3	2	1	2	0	1	0	3	2	3	2	2	4	2	2	2	3	2	2	3	3	2	1	3	3	3	2	1	2	2	3	3	3	2	2	3	3	3	3	3	2	84	4	4	3	3	3	2	3
2	2	3	2	2	0	1	0	2	3	2	3	3	3	2	3	3	3	3	4	3	4	3	3	2	2	3	3	4	2	3	3	3	3	3	3	3	3	3	4	4	3	101	4	3	4	3	3	3	1
1	3	1	2	2	0	1	0	2	2	3	3	2	3	2	3	3	2	4	2	2	2	2	2	3	2	2	3	2	3	3	3	3	2	2	2	2	2	2	2	3	2	82	3	3	3	2	3	2	3
1	3	2	1	1	1	0	0	4	3	4	3	3	4	3	4	4	3	3	2	5	3	2	3	3	3	4	3	4	4	3	2	3	4	3	3	3	4	3	4	2	3	111	2	2	2	3	3	3	2
2	4	1	2	1	1	0	0	2	2	2	3	3	3	2	2	3	2	2	2	3	3	3	2	3	1	2	4	3	2	2	2	2	2	2	2	3	3	2	3	2	2	81	3	3	3	3	3	3	4
2	1	1	2	1	1	0	0	2	1	3	2	2	2	1	2	2	2	1	2	2	2	1	2	1	2	2	2	1	2	3	1	2	1	2	3	1	1	2	2	1	3	61	3	3	3	3	3	3	3
2	3	3	2	3	1	0	0	3	3	3	2	3	3	3	3	3	2	3	3	3	3	2	3	2	3	3	3	2	3	3	3	3	3	3	2	3	3	3	2	3	2	94	2	3	3	3	3	3	3
1	2	1	2	3	1	0	0	2	3	2	2	2	3	2	2	3	2	1	2	3	2	2	2	2	3	2	2	2	2	2	2	2	3	2	3	2	2	1	3	2	2	74	2	2	3	2	3	2	3
2	3	3	2	2	1	0	0	2	3	3	2	2	2	3	3	2	2	2	3	2	2	3	3	3	3	3	2	1	2	2	2	3	3	3	2	3	3	3	4	3	3	87	2	2	2	2	2	3	3
1	2	3	1	1	1	1	0	3	2	1	2	3	2	2	2	2	3	3	2	3	2	2	1	2	2	2	2	3	3	2	2	2	3	2	2	1	3	2	2	2	2	74	3	4	3	3	4	3	4
2	1	3	2	1	1	1	0	2	3	3	3	3	3	2	2	2	3	3	3	3	3	3	3	3	4	3	3	2	3	3	3	3	3	2	3	2	2	3	3	3	3	95	2	2	1	1	2	3	2
2	3	1	2	1	1	1	0	3	3	4	3	4	3	3	3	2	3	4	4	4	3	3	2	3	3	4	3	3	3	4	4	4	3	2	3	3	3	3	3	2	3	107	2	3	2	3	2	2	2
2	2	2	1	1	0	0	1	3	3	2	1	3	3	2	2	3	3	2	2	3	2	3	2	3	3	2	2	3	3	2	2	2	3	3	2	2	3	3	2	2	2	83	2	2	2	2	2	2	2
1	1	2	1	2	0	0	1	3	3	3	3	3	3	2	3	2	4	4	3	3	2	3	3	3	3	3	3	3	3	3	3	3	3	3	3	2	2	3	3	3	2	98	2	0	2	1	2	2	2
2	1	1	1	2	0	0	1	2	3	2	2	3	3	2	3	2	2	3	2	3	2	3	3	2	3	3	3	3	3	3	3	3	4	3	3	3	2	3	3	3	2	92	2	4	3	3	3	3	4
1	2	3	1	1	0	1	1	2	3	3	2	3	2	3	3	3	3	1	3	2	3	3	4	1	2	3	3	2	3	2	2	2	2	2	3	3	3	2	3	3	2	86	2	2	2	2	3	2	2
2	4	2	1	3	0	1	1	3	2	2	2	2	3	2	1	2	2	2	3	3	2	2	3	3	3	3	3	2	2	4	3	3	3	2	3	2	2	2	2	3	2	83	4	2	3	3	3	3	3
2	4	1	2	3	0	1	1	2	3	2	3	2	3	2	2	3	2	3	3	2	2	2	3	3	2	3	2	3	2	2	2	2	2	3	2	2	2	2	3	2	3	81	3	3	4	3	4	4	3
2	2	2	2	2	0	1	1	2	2	2	3	3	2	2	2	2	4	1	2	1	2	3	2	3	2	2	3	2	2	2	2	3	3	2	2	2	2	1	3	2	3	76	2	3	2	3	3	3	3
1	2	3	2	2	1	0	1	3	2	2	2	2	3	2	3	2	3	3	2	2	1	3	3	2	2	2	2	2	2	3	2	3	2	2	2	2	2	2	4	2	3	79	4	3	3	3	3	3	3
1	2	1	2	2	1	0	1	3	3	2	3	2	3	2	3	3	3	3	3	2	4	3	2	2	3	2	2	2	2	4	2	3	2	3	4	2	2	3	3	3	3	91	3	4	3	4	3	3	4
1	2	3	2	2	1	1	1	3	2	2	3	2	3	3	3	3	1	3	3	2	2	3	3	3	2	2	3	3	2	3	2	2	3	2	2	2	3	2	2	2	3	84	2	2	2	1	2	2	2
2	4	2	2	2	1	1	1	2	2	2	3	2	2	2	3	1	3	2	3	3	2	3	3	3	2	2	2	2	3	3	3	2	2	3	2	3	2	2	3	1	3	81	2	2	2	2	2	2	2
1	1	2	1	1	0	0	0	4	2	3	2	2	3	1	3	3	3	2	2	2	3	3	3	3	2	3	2	2	2	3	3	3	2	2	3	3	3	2	3	3	2	87	3	3	4	3	3	4	3
2	3	3	1	2	0	0	0	2	3	3	3	3	2	3	3	2	3	3	3	2	2	2	3	2	2	3	2	2	4	2	2	2	2	2	4	2	4	3	2	3	2	87	3	3	4	4	3	4	3
1	1	2	1	2	0	0	0	2	2	4	3	3	3	3	3	2	4	3	3	2	2	2	3	2	2	3	2	3	2	2	3	3	3	3	2	3	2	2	3	3	3	90	2	2	3	2	3	2	2
1	3	3	2	2	0	0	0	2	3	2	4	2	3	2	2	2	3	2	3	3	2	3	3	3	3	3	3	2	2	2	3	3	3	2	2	3	2	2	3	3	3	88	3	3	3	2	3	2	3
1	3	3	2	2	0	0	0	3	3	2	3	3	3	3	3	3	3	3	2	3	2	4	3	2	3	2	3	2	3	3	3	3	2	2	2	2	3	3	3	2	4	93	2	2	3	3	2	3	2
2	3	3	2	2	0	0	0	2	2	2	2	3	3	4	2	4	4	2	2	3	3	3	3	3	3	3	3	3	3	3	3	3	3	2	3	3	3	3	3	2	3	96	3	3	3	2	2	3	2
1	2	1	2	2	0	0	0	4	3	3	2	3	2	3	3	3	3	2	3	3	4	3	3	3	2	3	3	3	1	3	3	3	3	3	3	3	3	3	4	2	3	98	1	3	2	2	3	3	2
2	2	2	1	1	0	1	0	2	3	2	3	2	2	2	3	3	3	2	3	2	2	2	2	3	3	2	2	3	2	3	3	3	2	2	2	3	1	2	3	2	2	81	2	3	3	2	2	3	3
1	1	1	1	1	0	1	0	2	2	2	3	2	1	2	3	1	2	2	2	2	2	1	2	2	1	1	3	2	2	2	3	2	2	2	3	2	2	2	3	2	2	69	3	3	3	3	4	4	3
1	1	2	2	1	0	1	0	2	2	2	2	3	2	2	3	2	3	4	2	2	2	2	2	2	3	2	3	2	3	2	3	2	2	3	3	2	1	2	2	2	1	77	4	3	4	4	4	4	3
2	3	1	2	1	0	1	0	3	3	3	2	2	3	3	3	3	3	2	3	3	3	2	2	3	3	4	3	3	2	3	2	2	3	2	3	3	3	3	3	3	3	94	3	3	4	3	3	3	3
2	2	3	1	2	0	1	0	3	3	3	2	3	3	2	3	3	4	3	2	3	2	3	2	3	3	2	3	3	3	3	3	4	3	3	2	3	3	2	3	3	4	97	3	3	2	2	2	2	2
2	1	2	2	2	0	1	0	2	3	2	3	2	3	2	2	3	2	3	3	3	2	3	2	1	3	3	2	2	3	3	4	3	3	3	3	2	2	3	3	3	3	89	2	2	3	2	2	3	4
2	1	2	2	2	0	1	0	2	2	3	2	3	2	2	2	3	2	3	3	3	3	3	2	3	2	3	3	2	2	3	3	3	3	3	3	3	2	3	3	3	3	90	2	2	2	3	3	3	2
1	2	1	2	2	0	1	0	3	2	2	3	3	2	2	3	3	3	2	3	3	3	3	3	3	4	3	3	2	2	3	3	3	3	3	3	2	3	3	3	3	3	95	2	2	3	2	2	3	2
2	3	1	2	2	0	1	0	1	2	2	2	3	2	2	2	2	3	2	1	2	3	2	2	2	2	3	2	2	2	2	2	2	2	2	2	2	3	2	2	1	2	70	3	3	3	3	3	3	3
1	1	1	1	3	1	0	0	3	2	3	3	2	3	1	2	3	3	3	2	3	2	2	3	2	3	3	4	2	3	3	3	2	3	3	3	2	3	2	2	2	3	88	2	2	2	2	3	2	3
1	1	2	1	1	1	1	0	3	3	2	3	1	3	3	3	2	2	3	4	2	3	3	2	2	2	2	2	3	3	2	3	2	2	3	3	2	3	3	3	3	2	87	4	4	4	4	4	4	4
1	2	1	1	1	1	1	0	2	2	3	3	4	2	3	3	3	3	3	2	2	3	3	3	3	3	2	3	3	2	3	3	4	3	3	2	3	2	3	2	2	3	93	4	4	4	3	3	3	4
2	3	2	1	3	1	1	0	3	3	3	3	4	2	2	3	3	2	3	3	2	3	3	2	3	3	3	3	3	4	3	3	4	3	2	3	2	3	4	2	3	4	99	2	2	2	2	1	2	2
2	1	2	2	3	1	1	0	1	3	2	2	3	2	3	3	2	3	3	3	2	3	2	2	2	3	2	3	3	3	3	3	3	2	1	2	3	2	2	3	2	2	83	3	4	4	4	4	4	3
2	1	3	2	2	1	1	0	3	2	2	2	2	2	3	2	2	2	3	2	3	2	3	2	3	2	3	2	2	3	2	2	2	3	2	3	2	3	1	3	2	2	79	2	3	3	3	2	2	2
2	2	1	2	2	1	1	0	3	3	3	3	3	2	3	3	4	3	3	3	2	1	2	3	2	2	3	3	3	3	3	3	2	2	3	3	3	2	3	3	3	2	92	3	3	3	3	3	3	2
1	2	1	2	1	0	0	1	3	3	2	2	2	2	2	2	2	2	3	3	2	2	2	3	2	3	2	2	3	2	2	2	3	3	3	2	1	3	2	3	2	2	79	3	4	4	4	4	4	3
1	2	2	2	3	0	0	1	3	3	2	4	3	3	3	4	3	2	2	2	2	3	3	2	2	2	3	2	3	3	4	3	3	3	3	2	3	3	3	3	2	3	94	4	3	4	3	3	4	4
1	2	3	2	2	0	0	1	2	2	2	3	2	3	3	2	2	2	2	2	3	3	3	3	2	3	2	2	2	3	3	3	1	2	3	3	3	2	4	3	3	3	86	3	4	2	3	4	3	3
1	2	2	2	2	0	0	1	3	2	3	3	3	3	3	2	3	2	3	3	3	3	2	3	2	3	2	3	3	3	2	3	3	3	3	2	3	3	3	2	3	3	93	3	3	3	2	2	3	3
1	2	3	1	1	0	1	1	3	2	2	3	2	2	2	3	2	3	3	3	3	2	2	2	2	3	3	3	2	2	2	2	2	2	3	2	3	3	2	3	2	2	82	2	2	1	2	2	1	2
1	2	1	2	1	0	1	1	1	2	3	2	2	3	3	2	3	3	2	2	1	3	3	2	1	1	3	2	2	1	2	3	2	2	3	2	2	2	3	2	2	2	74	3	4	3	3	3	4	3
1	2	3	2	3	0	1	1	3	2	1	3	3	2	2	2	2	2	2	2	3	2	2	1	1	2	2	2	2	2	3	1	2	3	2	2	3	2	3	2	3	1	72	3	3	3	3	2	2	1
1	2	3	1	2	1	0	1	2	3	2	1	2	2	2	1	1	2	2	3	2	2	2	2	2	1	1	2	2	3	3	2	3	2	2	2	3	2	3	3	2	2	71	1	0	0	2	2	2	1
1	2	2	2	1	1	1	1	2	3	3	2	2	3	3	3	2	3	3	3	2	4	2	4	3	3	2	3	3	3	3	3	3	2	3	3	3	2	2	3	3	2	93	2	3	2	2	3	3	2
1	2	3	1	1	0	0	0	3	2	3	2	3	2	3	2	3	4	3	3	3	3	2	2	4	2	3	3	2	2	3	3	3	2	3	2	2	2	2	3	3	1	88	4	3	3	3	4	4	4
1	2	3	2	1	0	0	0	2	2	2	2	2	2	2	2	3	3	3	3	3	3	3	3	2	3	2	3	3	3	3	4	3	2	3	2	3	3	2	2	3	2	88	3	4	3	2	4	4	4
1	2	1	1	3	0	0	0	2	3	3	2	2	3	2	3	2	2	3	2	2	2	3	2	2	3	3	3	2	2	2	2	2	2	3	2	2	3	4	2	2	2	81	3	2	2	2	3	1	2
1	2	3	2	3	0	0	0	2	2	2	2	3	3	2	3	2	2	2	3	2	2	2	2	2	2	3	3	2	1	2	2	1	4	2	2	2	2	3	2	2	2	75	3	2	3	3	2	2	3
1	2	1	1	2	0	0	0	1	3	3	3	3	2	2	2	2	3	3	2	2	2	3	3	3	3	2	2	3	3	3	3	3	1	3	2	2	3	3	2	2	3	85	2	3	3	3	4	2	2
1	2	2	2	2	0	0	0	2	2	2	3	2	3	3	3	2	2	2	2	2	2	2	2	3	2	3	3	2	3	2	3	3	2	2	3	2	2	3	3	3	3	83	4	4	3	4	3	3	3
1	2	2	2	2	0	0	0	3	2	3	3	3	2	3	2	3	2	2	2	2	2	3	3	3	2	3	3	2	1	2	2	3	2	2	3	2	3	3	2	2	3	83	3	3	3	2	4	3	4
1	2	1	1	1	0	1	0	2	2	3	3	3	2	2	2	2	2	3	2	3	3	3	2	2	3	2	3	2	2	2	2	3	3	3	3	2	2	2	3	3	2	83	3	3	3	3	3	2	4
1	2	3	2	1	0	1	0	3	3	3	2	3	3	2	3	2	2	2	2	3	3	3	3	3	3	3	3	3	2	2	2	3	3	4	3	3	2	3	3	3	3	93	3	4	3	3	3	2	2
1	2	2	2	1	0	1	0	2	1	1	2	1	1	3	1	1	1	2	3	2	3	1	2	2	2	1	2	2	2	2	2	2	3	2	2	2	2	3	3	1	2	64	4	4	4	4	4	4	4
1	2	3	1	3	0	1	0	3	2	2	2	2	3	2	3	3	3	3	2	2	3	2	2	3	2	2	2	2	1	3	2	2	2	2	3	2	3	2	2	2	2	78	3	4	3	4	3	3	4
1	2	2	2	3	0	1	0	3	2	3	2	3	2	3	3	3	3	2	3	3	2	2	3	3	3	2	4	2	3	3	2	3	2	3	2	2	2	2	2	2	1	85	3	4	2	3	3	4	2
1	2	2	1	2	0	1	0	3	3	3	2	3	3	4	2	3	4	4	3	1	2	3	2	3	3	3	3	3	3	2	3	4	3	2	4	3	3	3	3	3	3	99	2	3	3	2	2	2	3
1	2	1	1	2	0	1	0	2	2	2	2	2	2	3	2	3	3	2	3	2	3	2	2	2	2	2	3	2	2	3	2	3	3	2	2	2	3	3	2	2	1	78	3	2	3	2	1	3	3
1	2	3	2	2	0	1	0	3	2	2	2	2	2	3	2	3	1	3	2	2	3	2	3	2	2	2	2	3	3	3	2	3	3	2	2	3	3	2	2	3	2	81	4	3	3	4	4	4	3
1	2	2	2	2	0	1	0	3	3	3	3	2	3	3	3	2	3	2	2	2	3	2	3	2	2	2	2	3	3	3	2	3	3	2	3	3	3	2	3	3	3	89	2	3	3	2	3	2	3
1	2	1	2	1	1	0	0	2	2	2	2	2	2	3	2	1	2	2	2	2	1	2	1	1	1	2	2	2	2	2	2	1	1	1	3	2	2	1	2	2	1	60	3	3	3	3	2	2	3
1	2	3	2	3	1	0	0	4	2	3	3	4	4	3	1	2	2	2	2	3	3	2	3	2	3	3	3	3	2	3	3	4	2	3	3	3	2	3	3	3	1	92	4	3	3	3	3	3	3
1	2	2	2	2	1	0	0	2	3	2	2	3	3	2	3	3	3	3	2	2	3	3	3	2	3	3	3	3	3	3	3	3	4	4	3	3	3	3	3	3	3	97	3	2	3	3	3	3	3
1	2	2	1	1	1	1	0	2	3	3	2	3	2	3	2	2	3	3	3	3	3	3	1	2	3	3	2	2	2	3	2	2	2	2	2	2	2	2	2	1	2	79	2	2	1	1	3	2	2
1	2	1	2	1	1	1	0	2	3	3	2	2	2	2	3	2	2	3	3	2	3	3	3	2	3	1	3	3	3	3	3	2	2	3	2	3	3	1	2	3	3	85	3	3	4	4	4	3	4
1	2	3	1	2	1	1	0	3	3	4	2	3	2	2	2	2	2	3	2	2	2	2	2	2	3	3	2	2	3	2	3	3	2	2	2	3	3	2	3	2	2	82	2	1	2	2	2	2	1
1	2	3	2	2	1	1	0	3	2	2	3	3	3	3	3	2	3	2	2	2	3	3	3	2	2	2	2	3	2	2	2	2	3	2	2	3	2	2	2	2	3	82	3	4	4	3	3	4	3
1	2	2	2	2	1	1	0	3	2	3	1	3	2	3	2	2	3	4	3	2	2	3	3	2	2	3	2	2	2	2	2	3	2	3	3	1	2	3	2	2	2	81	4	3	3	4	4	3	4
1	2	2	1	1	0	0	1	2	3	2	2	3	2	3	3	3	2	3	2	2	2	3	3	2	2	2	3	2	3	2	3	3	2	2	2	3	2	3	3	2	3	84	4	2	3	3	2	2	3
1	2	2	1	1	0	0	1	3	3	4	2	3	2	3	3	3	3	3	3	3	4	4	3	3	3	4	3	3	4	2	2	3	2	3	2	2	2	4	3	3	3	100	2	2	2	2	1	4	2
1	2	1	1	1	0	0	1	3	2	4	4	3	3	2	2	2	2	2	3	3	3	3	3	3	3	3	3	2	2	2	2	3	3	2	3	3	3	2	2	2	3	90	2	2	2	3	3	2	3
1	2	1	2	1	0	0	1	3	3	2	3	2	3	3	2	2	3	2	1	3	1	2	3	2	3	2	2	3	2	2	2	3	2	2	2	2	2	2	2	3	2	78	2	2	3	3	3	2	2
1	2	1	2	3	0	0	1	3	3	2	3	3	2	2	2	2	3	3	2	2	2	2	2	3	2	2	2	3	3	3	3	2	3	3	3	3	3	3	3	3	2	87	3	3	4	3	3	4	4
1	2	1	1	2	0	0	1	3	3	2	2	3	3	3	2	3	2	2	2	3	3	3	3	2	2	3	3	2	2	3	3	2	2	2	3	2	3	3	3	2	1	85	2	3	3	2	2	3	3
1	2	3	2	2	0	0	1	4	3	3	3	3	2	3	2	2	2	3	3	2	2	2	3	2	2	2	2	3	2	3	2	2	3	3	2	2	3	2	2	3	2	84	2	3	3	2	3	2	3
1	2	2	2	2	0	0	1	2	2	3	3	3	3	3	1	2	2	3	2	1	3	2	2	3	3	2	3	3	2	3	2	3	3	2	3	3	2	2	3	2	2	83	3	2	3	4	3	3	3
1	2	1	2	2	0	0	1	3	3	3	4	4	3	4	3	4	2	3	3	3	3	3	3	3	3	3	4	3	3	4	3	3	3	3	4	3	3	3	4	4	3	110	3	2	2	2	3	3	3
1	2	3	1	3	0	1	1	2	4	3	3	3	3	4	3	3	3	3	4	3	3	2	3	4	3	2	3	3	4	4	4	3	3	4	3	2	3	4	3	2	4	107	2	3	3	2	2	2	2
1	2	1	1	3	0	1	1	3	3	4	4	3	4	2	4	3	3	3	2	3	3	2	3	3	4	4	3	2	4	3	3	4	3	2	4	3	4	3	3	3	4	108	3	3	3	3	3	3	3
1	2	2	2	3	0	1	1	2	2	3	3	2	2	3	3	3	2	2	3	3	3	2	2	3	2	2	3	3	3	2	2	2	2	2	2	3	3	2	2	2	2	82	3	3	3	3	3	4	3
1	3	2	2	3	0	1	1	2	2	2	2	2	3	3	3	2	2	3	2	3	3	3	3	3	2	2	3	3	2	2	2	2	3	3	4	3	3	3	2	2	2	86	2	3	3	3	3	3	2
1	3	1	1	2	0	1	1	2	3	2	2	2	3	3	3	3	3	2	3	2	3	2	3	3	3	3	2	2	2	2	2	3	3	2	3	1	3	3	2	3	2	85	3	2	3	3	3	3	1
1	3	1	1	1	1	0	1	2	2	3	3	3	2	1	3	2	2	2	2	3	3	2	3	2	3	2	2	4	2	1	2	1	3	2	2	2	1	2	2	2	2	75	3	3	2	3	2	3	4
1	4	3	1	2	1	0	1	2	1	2	3	2	2	2	3	3	2	1	2	2	3	3	3	3	3	3	1	2	2	3	2	2	2	3	3	3	3	2	3	2	2	80	4	4	4	4	4	4	4
1	4	3	2	2	1	0	1	3	3	1	3	3	3	2	2	2	3	3	2	1	3	1	3	2	2	2	2	2	1	3	3	1	2	3	1	3	1	3	2	2	3	76	2	2	3	3	3	3	2
1	2	2	1	3	1	1	1	4	3	3	4	3	4	4	4	3	3	3	3	3	3	3	3	3	3	3	3	4	3	3	4	3	3	3	3	3	2	4	3	3	4	110	2	2	2	2	3	2	2
1	3	3	1	2	1	1	1	2	2	2	2	2	2	2	3	3	3	2	2	2	2	2	3	2	2	3	2	2	3	3	2	2	2	3	3	2	2	2	2	2	2	77	4	4	4	3	4	4	4
1	3	3	2	1	0	0	0	2	3	2	2	2	3	3	2	3	3	3	2	1	3	2	2	3	3	3	2	2	1	2	3	3	2	2	2	2	3	3	2	2	1	79	4	3	3	4	4	4	3
1	3	2	1	3	0	0	0	2	3	3	2	3	3	3	3	3	4	3	4	2	3	2	3	3	2	3	3	2	2	2	3	3	3	2	3	3	3	3	2	2	2	92	3	3	3	4	4	3	3
1	1	3	1	2	0	0	0	2	2	3	2	2	3	3	2	2	2	2	3	2	3	3	3	2	2	3	2	2	2	3	3	2	4	3	2	3	3	2	3	3	2	85	2	2	2	2	2	2	2
1	4	2	1	2	0	0	0	3	3	2	2	3	4	2	3	3	3	3	4	2	2	2	2	3	2	3	2	3	2	2	3	3	3	3	3	3	3	4	3	3	3	94	3	4	3	2	4	2	2
1	1	2	1	2	0	0	0	2	2	3	3	3	4	2	3	3	3	2	2	2	2	2	2	2	2	2	2	2	3	3	2	1	2	2	2	3	3	2	3	3	3	82	3	2	3	3	2	2	2
1	1	3	2	2	0	0	0	3	3	2	3	3	3	4	4	2	2	2	3	3	2	3	3	2	4	2	3	2	2	3	2	2	2	3	3	3	3	3	2	3	3	92	3	3	3	3	3	3	4
1	4	3	1	1	0	1	0	3	3	3	3	3	2	3	3	3	2	3	2	3	3	3	3	4	2	3	3	3	2	3	4	2	3	3	3	3	3	3	2	4	3	98	2	2	3	3	3	2	2
1	3	2	2	1	0	1	0	2	3	3	3	4	4	3	3	2	2	2	3	3	3	2	3	2	2	4	3	2	2	3	3	3	2	3	3	4	3	3	3	2	2	94	2	2	2	1	3	2	3
1	2	2	2	3	0	1	0	3	3	3	3	3	2	3	3	3	3	3	3	2	2	3	2	3	3	3	2	3	4	3	3	3	3	3	4	3	3	2	3	2	3	97	3	2	3	2	2	2	3
1	3	3	2	2	0	1	0	2	2	3	2	3	1	2	2	2	3	3	2	3	2	2	3	2	3	3	3	2	2	3	3	2	3	2	3	2	2	2	2	3	2	81	3	3	3	4	3	4	4
1	3	1	2	2	0	1	0	2	3	2	2	4	2	3	3	3	2	4	3	2	2	2	4	3	3	3	3	2	2	3	2	2	3	3	2	3	3	3	3	2	3	91	3	3	3	4	3	2	3
1	3	2	1	3	1	0	0	3	3	3	3	3	2	3	3	1	3	3	2	2	3	3	3	2	3	2	2	2	3	3	3	3	3	3	2	3	3	2	2	3	3	90	3	2	2	2	1	2	1
1	2	1	1	3	1	0	0	3	2	3	2	3	3	4	4	3	3	3	2	2	3	3	3	4	3	3	3	2	3	3	3	3	3	2	2	3	3	3	3	3	4	99	3	2	3	3	2	3	3
1	2	1	1	2	1	0	0	3	3	3	3	3	2	3	3	3	3	2	3	2	2	2	3	3	3	3	3	3	2	2	2	3	3	2	2	3	3	3	2	2	3	90	4	4	4	4	3	4	4
1	1	3	2	2	1	0	0	2	2	2	2	2	2	2	2	2	2	3	1	2	2	2	3	1	3	2	3	2	2	2	2	2	3	2	3	2	2	2	2	3	2	73	3	3	3	3	4	2	1
1	3	1	2	3	1	1	0	2	3	2	3	2	2	2	2	2	3	3	2	2	1	3	2	2	3	2	3	2	2	2	2	2	2	3	2	2	2	3	2	2	3	77	3	3	3	2	3	2	3
1	1	1	2	1	0	0	1	3	2	2	3	2	2	2	2	3	3	3	4	2	3	3	2	3	2	3	2	3	1	2	3	3	2	1	2	3	3	4	3	2	2	85	3	2	3	3	4	2	3
1	2	3	2	3	0	0	1	2	2	2	2	1	2	2	1	2	3	3	1	2	2	2	3	2	2	3	2	2	2	3	2	1	1	2	1	1	3	1	1	1	2	64	4	4	3	4	4	3	4
1	2	2	2	2	0	0	1	1	2	2	2	2	2	1	3	2	2	2	2	2	3	1	2	3	2	3	2	2	2	3	2	2	2	1	1	2	3	3	2	2	2	70	3	2	4	3	3	3	3
1	3	2	2	2	0	0	1	1	2	3	2	2	2	2	2	1	2	2	1	1	1	2	2	2	2	2	2	3	2	2	1	2	2	1	1	3	2	1	2	2	1	61	4	4	3	4	3	3	4
1	2	1	2	2	0	1	1	2	3	2	3	2	3	3	3	2	3	3	2	3	2	2	3	2	2	2	4	3	2	3	2	3	2	2	3	2	2	2	2	3	3	85	1	2	2	2	4	3	3
1	4	3	1	1	1	0	1	2	1	3	2	3	3	2	3	3	3	2	3	2	2	3	3	3	2	4	3	3	3	2	2	2	2	2	1	3	2	2	3	3	3	85	2	3	2	2	2	2	1
1	1	2	2	1	1	1	1	3	2	2	3	2	4	3	2	3	3	2	3	3	3	2	3	3	3	3	3	2	3	4	3	4	3	3	2	2	2	4	3	2	3	95	3	4	3	3	3	3	4
1	3	3	2	2	1	1	1	2	3	2	2	2	2	2	2	3	3	3	3	2	3	3	3	1	2	2	3	2	3	2	2	2	2	3	2	3	1	2	2	3	2	79	4	4	4	4	3	3	3
1	4	2	2	2	1	1	1	3	2	3	3	2	3	2	2	2	3	3	3	2	2	2	3	2	3	2	2	3	3	3	2	2	3	2	2	3	3	1	3	2	3	84	4	4	4	4	3	4	4
1	4	2	1	1	0	0	0	2	3	3	4	3	3	3	3	3	3	3	3	3	3	3	3	2	3	2	3	3	2	3	2	3	3	3	3	3	3	4	2	2	3	97	2	3	3	3	3	3	3
1	4	2	2	1	0	0	0	3	3	1	2	3	2	2	2	2	2	1	3	3	3	3	2	3	4	2	2	2	2	2	2	2	2	2	2	2	3	2	2	2	3	78	4	4	3	4	4	3	4
1	2	1	1	3	0	0	0	2	3	2	4	3	4	3	3	3	3	3	3	3	4	3	3	3	2	3	3	4	3	3	3	3	3	4	4	3	4	3	3	3	3	106	2	2	2	2	2	3	3
1	3	3	2	2	0	0	0	2	3	2	2	3	2	3	2	4	3	3	2	2	2	2	2	3	3	3	2	3	3	2	2	2	3	2	3	3	2	2	2	3	2	84	3	2	2	3	2	2	3
1	1	3	2	2	0	0	0	3	2	3	2	3	2	4	3	3	3	3	2	3	2	2	3	2	3	2	2	3	3	4	2	3	3	3	2	2	3	3	2	3	3	91	2	3	3	3	2	3	2
1	1	2	2	2	0	0	0	3	3	4	5	3	3	3	3	3	3	3	3	4	3	4	3	3	3	3	3	2	3	3	2	3	2	3	3	3	2	3	4	2	3	103	3	3	3	3	3	2	3
1	3	2	2	3	0	1	0	2	2	2	2	2	2	1	3	2	2	2	2	3	2	2	3	3	2	2	1	2	1	3	3	2	2	2	2	3	2	2	3	1	2	72	4	4	4	3	3	3	4
1	3	1	2	3	0	1	0	2	3	2	3	4	2	3	2	3	3	2	3	2	2	2	3	2	2	3	2	2	3	2	3	3	2	2	3	3	3	3	2	3	2	86	3	4	4	4	3	3	3
1	1	2	1	2	0	1	0	2	3	2	3	3	3	3	2	2	3	3	2	2	3	3	3	2	3	3	3	3	2	3	4	3	3	2	2	3	3	3	3	3	3	93	3	3	4	3	3	4	2
1	2	2	2	2	0	1	0	2	3	2	2	3	3	3	2	3	3	3	2	2	2	3	3	3	2	3	2	2	3	2	3	3	2	3	3	2	3	3	2	2	3	87	3	2	2	2	3	3	2
1	2	2	2	2	0	1	0	3	3	3	2	3	3	4	3	3	3	3	4	4	3	2	3	2	3	3	3	3	3	3	3	2	3	4	3	3	3	3	3	3	3	102	3	3	3	4	3	2	4
1	4	2	2	1	1	0	0	2	3	3	1	2	3	3	2	2	3	2	2	3	2	2	2	2	2	1	2	2	3	2	2	3	3	3	2	3	1	2	3	3	1	77	3	2	3	2	3	3	3
1	4	2	2	1	0	0	1	3	1	3	2	1	2	2	3	3	3	1	2	2	1	2	3	2	3	3	2	2	1	2	3	3	3	2	3	2	2	2	3	3	2	77	3	2	3	2	3	3	3
1	4	1	2	1	0	0	1	2	1	3	3	2	2	3	3	2	3	3	2	2	3	3	3	2	3	2	3	3	3	2	2	2	2	3	3	2	3	2	3	3	3	86	3	3	4	3	4	3	3
1	1	1	2	1	0	0	1	3	3	3	3	3	3	3	3	3	3	4	3	3	3	3	4	3	2	3	3	4	3	3	3	3	2	3	3	3	3	3	4	3	3	104	3	3	3	3	3	4	2
1	4	1	1	1	0	1	1	3	2	3	3	3	3	2	2	2	3	3	3	2	2	2	4	2	3	3	3	2	2	3	3	3	2	3	3	2	3	2	3	3	3	90	2	3	3	3	2	3	3
2	2	1	2	1	0	1	1	3	3	2	3	2	3	2	3	3	4	3	3	3	4	3	2	4	3	3	3	3	2	3	3	3	3	3	3	2	4	3	2	3	3	99	2	3	3	2	2	2	3
1	4	1	2	3	0	1	1	2	4	3	3	4	3	2	4	2	3	3	3	4	4	3	2	3	3	4	2	2	3	3	3	3	3	3	3	4	3	3	3	3	3	103	2	2	2	2	3	3	3
1	1	1	2	3	0	1	1	2	2	2	2	3	3	3	2	4	2	2	3	3	3	3	3	3	3	3	3	3	2	3	3	3	2	3	2	3	2	3	3	3	3	92	2	2	1	3	2	2	3
1	2	2	1	2	0	1	1	3	2	2	2	2	2	2	3	3	3	3	3	3	4	2	3	2	3	1	3	3	2	3	2	3	2	3	2	2	2	2	2	2	3	84	2	3	3	2	2	2	2
1	4	3	1	1	0	0	0	2	2	2	2	2	3	2	2	2	2	1	3	2	2	3	2	1	2	3	2	2	3	3	3	2	2	2	2	2	2	3	2	2	2	74	3	2	3	4	3	2	3
1	2	2	1	1	0	0	0	3	2	2	3	3	2	2	2	3	3	3	2	3	3	3	2	3	3	3	3	2	3	3	3	3	4	3	3	2	4	2	3	3	2	93	3	3	3	3	3	3	3
2	3	2	2	1	0	0	0	3	2	4	3	3	3	4	4	4	3	3	3	3	3	3	2	3	3	3	4	3	3	4	3	3	3	2	2	4	4	3	4	2	3	106	2	2	1	2	2	3	1
1	1	2	1	3	0	0	0	3	3	3	3	3	3	2	3	2	2	2	2	3	3	3	3	2	3	3	3	3	2	3	3	3	3	2	2	3	3	3	2	3	2	91	1	2	2	2	2	3	2
2	1	2	1	2	0	0	0	2	2	2	2	3	2	2	2	3	3	2	3	2	2	2	4	2	2	2	3	3	2	2	2	2	2	3	2	2	2	2	3	3	2	79	2	3	3	4	4	3	4
2	4	1	1	2	0	0	0	2	4	3	3	2	3	2	3	3	3	4	3	3	4	3	3	4	2	3	3	4	3	2	2	3	3	4	3	2	3	2	3	3	2	99	4	3	3	4	3	3	4
1	4	3	2	2	0	0	0	2	2	2	2	3	2	2	2	3	2	3	3	3	2	3	3	2	3	3	2	2	3	3	3	3	2	4	3	3	2	2	2	2	3	86	2	2	3	2	2	2	2
2	3	3	2	1	0	1	0	3	3	3	2	2	2	3	2	3	2	3	3	3	2	3	3	2	2	3	3	3	3	3	3	3	3	3	3	2	2	2	3	3	3	91	2	3	3	3	3	3	3
1	4	2	2	1	0	1	0	3	3	2	3	3	4	4	3	3	3	2	2	3	2	3	2	3	3	2	2	3	4	3	3	3	2	3	2	3	3	3	3	3	3	96	4	4	3	3	3	3	3
1	2	1	2	1	0	1	0	3	2	3	2	3	3	3	3	3	3	2	3	3	2	3	3	3	2	2	3	3	3	2	2	2	3	3	2	3	3	3	2	3	3	91	4	4	3	4	4	3	3
2	3	1	2	3	0	1	0	3	3	3	3	3	3	4	4	3	3	3	3	3	3	2	4	3	3	3	3	3	4	3	3	4	4	2	4	3	3	4	3	3	3	108	3	2	2	2	2	2	2
1	1	1	1	2	0	1	0	3	2	3	2	2	2	2	3	3	3	3	3	2	2	3	2	3	2	2	3	3	3	3	2	2	2	2	3	3	3	3	3	3	3	88	4	4	3	2	3	3	3
1	3	2	2	2	0	1	0	2	3	3	3	2	4	3	3	3	3	4	3	2	3	2	3	4	3	2	2	2	3	3	3	2	3	2	3	2	3	3	3	3	2	94	2	3	3	2	2	2	2
2	2	2	2	1	1	0	0	3	2	3	4	3	3	3	2	3	3	2	2	3	3	2	3	3	2	2	3	3	3	2	3	3	4	3	3	3	2	4	3	2	3	95	2	3	2	3	3	2	3
2	2	2	1	3	1	0	0	3	2	2	3	3	4	3	3	3	3	3	3	2	2	2	3	4	2	2	3	3	2	3	2	3	3	3	3	4	3	3	3	3	3	96	2	2	3	3	4	3	3
2	3	2	2	2	1	0	0	2	2	1	3	2	2	2	2	3	3	3	2	2	2	3	2	2	2	3	2	2	2	1	2	2	3	2	3	2	2	3	2	2	2	75	4	4	4	4	4	4	4
2	1	2	2	2	1	0	0	2	1	3	2	3	3	2	2	3	3	3	2	3	3	3	3	2	2	1	3	2	3	3	3	3	2	2	3	2	2	1	3	3	2	83	4	3	3	4	4	3	3
1	3	1	2	2	1	0	0	2	3	2	2	2	3	3	3	2	3	2	3	3	3	2	2	3	3	3	2	3	3	3	3	3	3	3	2	3	2	3	4	3	3	92	3	3	3	2	4	3	4
1	4	1	2	2	1	0	0	3	3	2	3	3	3	3	2	3	3	2	3	3	2	3	3	2	3	3	3	3	2	2	2	3	2	3	3	2	3	3	2	2	4	91	4	3	4	4	3	3	3
2	1	2	1	3	1	1	0	2	2	3	2	3	2	2	2	2	2	1	2	2	2	2	3	1	3	1	2	2	2	2	1	3	3	2	2	2	3	2	3	2	2	72	3	4	2	3	4	3	3
1	1	3	2	3	1	1	0	3	2	3	3	2	3	3	3	3	3	2	3	2	4	2	3	3	3	3	3	3	3	3	3	3	3	3	3	3	4	2	3	3	3	98	2	1	2	2	2	2	1
1	2	1	2	3	1	1	0	2	3	1	3	3	3	4	3	2	4	3	3	3	4	3	2	4	2	3	2	3	3	3	2	4	3	2	3	2	4	3	3	3	3	98	2	3	3	2	4	3	2
1	2	3	1	2	1	1	0	2	3	2	1	1	2	2	3	3	2	1	2	2	2	3	2	3	2	1	3	2	2	2	3	2	2	3	2	2	3	2	2	2	3	74	3	2	2	2	3	3	2
2	2	1	1	1	0	0	1	2	2	2	2	2	2	3	3	2	3	2	3	2	2	2	2	2	2	2	2	3	3	3	3	3	2	2	2	2	2	2	2	3	3	79	2	3	3	3	2	2	2
1	2	2	1	3	0	0	1	3	2	4	2	3	3	3	4	2	3	4	3	3	3	2	3	2	4	4	3	4	3	3	2	3	3	4	3	2	3	2	3	3	3	101	3	3	3	3	3	3	2
2	3	2	2	3	0	0	1	2	2	3	3	1	2	2	1	2	3	1	2	1	2	3	2	1	1	3	2	2	3	2	3	2	2	3	3	2	2	2	2	3	2	72	3	3	3	2	3	3	3
1	2	1	1	1	0	1	1	2	4	3	3	3	3	3	3	3	3	3	4	3	3	3	3	3	2	2	2	3	2	3	3	3	3	3	3	3	2	2	3	3	2	96	3	3	3	3	3	3	3
2	4	1	2	3	0	1	1	3	2	3	3	3	3	2	2	3	3	2	2	3	3	3	1	3	3	2	3	2	3	2	3	3	3	2	2	3	3	2	2	3	3	88	3	3	2	2	2	4	4
1	3	1	1	1	1	0	1	3	3	4	2	3	4	3	3	3	4	3	4	3	2	3	3	3	3	3	3	3	3	3	4	3	2	4	3	4	3	4	3	3	3	107	3	3	3	3	3	3	3
2	3	2	1	1	1	1	1	3	2	2	2	2	2	2	2	2	2	3	2	2	2	3	2	3	2	3	2	2	2	3	2	2	3	3	2	2	3	1	2	2	3	77	3	4	4	3	3	4	3
1	4	2	1	1	0	0	0	3	3	2	2	2	2	2	1	2	2	2	1	2	2	2	2	3	3	3	3	2	2	3	3	2	2	2	2	2	3	2	3	2	1	75	3	2	2	4	3	3	3
1	4	2	1	1	0	0	0	3	3	2	3	3	3	2	2	3	2	3	3	2	3	2	3	3	2	2	2	2	3	3	3	3	3	2	2	3	3	1	3	1	2	85	2	3	2	3	3	3	2
2	4	2	2	1	0	0	0	3	3	3	2	3	3	2	3	2	3	2	2	2	3	2	3	2	2	2	3	2	2	3	3	2	3	2	3	2	2	3	3	2	2	84	1	3	4	3	3	3	3
2	4	1	1	2	0	0	0	3	2	2	2	2	2	2	3	2	2	3	3	3	2	2	3	2	3	3	2	2	3	1	3	2	2	2	3	2	3	3	2	3	2	81	4	3	3	3	3	3	3
1	2	2	2	1	0	1	0	2	2	2	3	2	3	1	2	3	2	2	2	2	3	3	3	2	3	2	3	3	3	2	3	2	2	2	3	2	2	2	2	3	2	80	2	2	2	2	1	2	2
2	2	3	2	3	0	1	0	3	3	3	2	2	3	3	2	3	2	2	2	3	2	2	3	2	3	2	3	3	3	3	3	2	3	3	2	2	2	2	2	3	3	86	3	3	3	3	4	4	3
2	3	3	1	2	0	1	0	3	2	3	3	2	3	3	3	3	2	2	2	2	3	3	3	4	3	3	3	3	2	3	3	2	3	3	3	3	3	3	3	2	3	94	3	2	4	3	3	3	2
1	2	2	1	2	0	1	0	1	2	2	2	2	2	2	3	3	2	2	3	2	2	2	2	2	2	2	2	2	2	2	3	2	3	3	2	4	3	2	2	2	2	76	3	3	2	3	3	3	3
2	2	2	2	2	0	1	0	3	3	2	2	1	2	3	2	2	2	2	3	2	1	2	2	3	1	2	2	1	3	2	3	2	3	3	2	2	2	2	2	2	1	72	2	3	3	2	3	4	3
2	1	3	2	1	1	0	0	2	4	3	4	2	3	3	3	3	3	3	3	2	3	3	4	2	2	3	3	3	4	3	3	3	2	2	3	3	3	4	4	3	3	101	2	1	3	2	2	2	2
2	2	2	1	3	1	0	0	3	3	2	3	3	3	2	2	3	2	3	2	2	3	1	3	2	2	2	2	3	2	3	2	3	2	2	2	2	2	4	3	3	3	84	2	3	2	2	3	2	2
2	1	1	2	3	1	0	0	3	2	2	2	3	3	2	2	3	3	2	2	2	3	3	1	2	2	3	3	3	4	2	1	2	2	3	3	3	2	2	2	2	3	82	3	3	4	2	2	3	2
2	3	2	1	2	1	0	0	2	3	2	3	3	3	2	2	3	2	3	3	3	3	4	2	2	2	3	2	3	2	2	2	2	3	3	3	3	2	1	2	4	2	86	2	3	2	2	2	2	4
2	2	1	2	2	1	0	0	1	1	2	2	2	1	3	2	1	2	1	2	2	2	2	2	2	2	2	2	2	2	2	3	3	2	3	3	2	2	2	1	2	1	66	4	4	3	3	4	4	4
1	4	2	1	1	1	1	0	3	4	2	2	2	2	1	3	2	3	2	3	3	2	2	2	2	3	2	3	2	3	3	2	2	2	1	1	3	2	3	1	3	2	78	2	3	1	2	2	3	2
2	2	3	2	1	1	1	0	2	2	2	2	2	2	2	2	2	2	3	1	2	2	2	1	2	1	2	1	1	2	1	2	2	2	2	3	2	2	2	2	2	2	64	3	3	2	3	2	3	3
2	1	2	2	1	1	1	0	3	2	2	4	3	2	2	2	3	2	2	1	2	3	2	2	2	2	2	2	2	2	2	3	3	3	2	3	3	2	3	2	3	2	80	3	3	3	3	4	3	3
1	4	3	2	2	1	1	0	3	2	2	3	3	3	2	3	3	3	3	3	2	3	2	3	2	2	3	3	2	3	2	2	2	3	3	2	2	2	3	2	3	2	86	2	2	1	2	2	2	1
2	3	3	1	1	0	0	1	3	3	4	3	3	3	3	2	3	4	3	2	4	3	3	3	2	3	2	3	2	3	3	3	3	2	3	3	3	2	2	2	3	2	95	3	3	3	3	4	2	4
1	2	3	1	1	0	1	1	3	1	2	3	2	3	2	2	3	3	2	2	2	2	2	3	2	3	2	3	2	3	1	3	2	3	3	2	3	3	3	4	2	3	84	4	4	3	3	3	3	3
2	2	2	2	1	0	1	1	3	3	3	3	3	3	3	2	3	3	2	3	2	3	2	2	3	2	4	2	3	2	3	2	3	2	3	2	2	2	3	3	2	4	90	1	1	1	2	2	2	3
2	2	2	1	2	0	1	1	2	2	1	3	2	2	1	2	2	2	2	2	3	2	2	2	2	2	2	2	2	2	2	2	3	3	3	2	2	3	1	2	2	2	71	4	4	3	4	3	4	3
1	3	2	1	2	0	1	1	3	1	2	2	2	2	2	3	2	2	2	2	2	3	2	3	3	3	3	2	2	2	3	2	4	3	3	2	2	2	3	2	2	3	81	2	2	1	2	2	1	2
2	2	1	1	2	0	1	1	2	2	3	2	2	2	3	3	2	2	2	2	2	3	2	2	2	2	2	2	2	2	2	3	3	2	2	3	2	1	3	3	2	2	76	3	2	3	2	3	2	2
2	3	2	2	2	0	1	1	3	2	2	4	2	3	3	3	2	2	3	2	2	3	3	3	3	2	3	4	3	3	2	3	3	3	3	3	4	4	3	2	3	3	96	3	2	4	3	3	3	3
1	3	3	1	2	1	0	1	2	3	2	3	3	2	2	1	3	2	2	3	3	3	3	2	3	3	3	2	2	2	2	3	2	3	2	3	2	2	3	2	3	2	83	2	3	2	3	2	2	3
2	2	2	1	2	1	0	1	2	2	2	3	3	3	3	3	2	3	3	2	2	3	3	2	3	2	3	3	3	3	2	3	2	2	3	2	3	3	3	3	3	3	90	3	4	4	4	4	4	3
2	1	2	1	1	1	1	1	3	3	3	2	2	3	3	4	3	3	3	2	2	2	4	3	3	3	2	2	3	3	3	2	2	3	3	2	2	2	2	2	3	3	90	3	3	3	3	3	2	3
1	4	2	2	1	1	1	1	3	3	3	3	2	3	2	3	2	3	3	3	2	3	3	2	2	2	2	3	3	2	3	3	2	3	2	2	2	2	3	3	3	2	87	4	3	4	4	3	3	3
2	2	1	1	3	1	1	1	2	3	2	2	2	3	3	3	2	2	3	3	3	3	2	3	3	2	3	2	2	3	3	3	3	3	3	3	2	2	3	2	3	2	88	1	2	1	2	2	2	1
2	3	3	1	2	0	0	0	2	2	2	3	3	2	2	3	2	3	2	2	3	2	3	2	3	3	2	3	3	2	2	3	2	2	2	3	3	2	3	1	3	3	83	3	3	3	4	3	3	3
1	3	1	1	2	0	0	0	2	3	3	2	3	2	3	3	4	2	2	3	3	3	2	3	2	4	3	3	3	1	3	3	3	3	3	3	2	3	1	2	3	3	91	3	3	3	3	3	3	4
2	3	3	2	2	0	0	0	3	4	3	3	3	3	3	2	2	2	4	3	2	3	3	2	2	2	3	3	2	4	3	4	3	2	2	3	3	3	2	2	2	3	93	3	4	3	3	2	3	3
2	1	1	2	2	0	0	0	3	2	3	2	3	3	2	3	3	2	3	3	3	3	2	3	2	2	1	2	1	2	3	3	2	3	3	2	3	2	2	3	3	2	84	2	2	1	3	3	2	2
1	2	1	1	1	0	1	0	3	2	2	2	3	3	3	4	2	1	2	2	2	4	3	3	3	2	3	2	2	3	3	3	3	3	3	2	2	3	4	2	3	3	90	2	1	2	1	1	2	1
1	2	3	2	1	0	1	0	2	3	3	3	3	2	3	4	2	3	3	2	2	3	3	3	3	2	2	3	3	4	3	3	2	3	3	2	3	2	2	3	4	4	95	4	3	3	3	3	4	3
2	4	2	2	1	0	1	0	3	4	3	3	3	3	4	3	3	3	3	3	3	2	3	2	2	2	3	2	3	3	3	3	3	3	2	3	2	3	3	4	3	3	98	2	3	3	3	3	2	3
2	3	1	1	2	0	1	0	2	2	2	2	2	2	2	2	2	2	2	2	2	2	2	3	2	2	3	3	2	1	1	2	2	1	2	3	3	2	2	2	3	2	71	3	4	3	4	3	4	2
1	2	1	2	2	0	1	0	3	3	2	3	3	3	3	2	2	3	3	3	3	2	3	2	3	3	2	2	3	3	2	3	3	2	3	3	2	3	2	3	2	2	89	2	2	1	2	2	2	2
2	4	1	2	2	0	1	0	2	3	3	3	2	2	2	2	2	2	1	3	2	3	3	2	1	2	3	3	3	1	3	3	3	2	2	2	2	2	2	2	2	1	76	3	3	3	4	3	3	4
2	2	3	1	3	1	0	0	3	3	3	3	2	3	2	2	3	3	3	2	2	2	3	3	3	2	2	3	2	2	3	2	2	2	3	3	3	2	2	2	3	2	85	3	3	3	2	3	4	2
1	4	3	1	1	1	1	0	3	2	2	3	3	3	2	2	2	2	3	2	3	3	2	3	2	3	2	3	3	2	2	3	2	2	2	2	2	3	2	3	3	3	84	3	3	3	3	2	4	3
2	4	2	2	3	1	1	0	2	3	3	2	3	3	2	2	2	3	2	3	3	2	3	3	3	2	3	3	2	2	3	3	2	3	3	3	2	2	2	2	2	3	86	4	3	4	3	4	4	3
1	2	1	2	2	1	1	0	2	3	3	4	2	2	2	2	3	2	1	3	3	3	2	3	3	2	2	2	3	3	3	2	2	2	2	2	3	3	3	1	2	2	82	3	3	3	3	3	3	2
1	2	1	2	2	1	1	0	2	3	2	4	3	3	3	2	2	2	2	3	2	3	3	4	3	3	2	3	3	2	3	3	2	2	3	2	3	3	3	2	3	2	90	1	0	1	2	1	1	0
2	4	2	2	2	0	0	1	2	3	3	3	3	3	1	3	3	2	3	3	3	3	3	2	3	3	3	4	3	3	3	3	3	3	3	3	2	3	3	4	3	3	98	3	2	3	3	3	4	2
1	4	2	2	1	0	1	1	3	3	3	2	3	3	3	2	2	2	2	2	3	2	3	3	3	2	3	3	3	3	2	2	3	3	3	3	2	3	2	3	2	2	88	4	3	4	4	2	4	4
2	4	1	2	1	0	1	1	3	3	1	3	3	2	2	3	2	2	3	2	3	3	3	2	2	2	2	3	2	2	2	2	2	2	2	3	1	2	2	2	3	2	78	4	3	3	3	4	3	4
2	4	1	2	2	0	1	1	2	3	3	4	2	3	4	3	2	3	2	2	3	3	3	3	2	3	3	2	3	3	3	3	3	4	3	2	3	2	3	2	3	2	94	2	2	1	2	1	2	1
1	1	1	2	2	0	1	1	4	3	2	2	2	3	3	3	3	3	2	2	4	3	3	3	2	3	2	3	3	3	2	2	2	3	3	2	4	3	4	2	3	3	94	4	3	3	3	3	3	3
1	3	3	2	2	1	0	1	3	3	3	1	3	3	3	2	3	3	3	3	2	4	3	3	4	3	2	3	3	3	2	2	3	2	3	2	3	3	3	2	3	3	94	2	2	2	2	2	2	3
2	1	1	1	3	1	1	1	3	2	2	2	2	2	2	2	2	2	2	2	2	2	2	2	2	2	3	2	3	3	2	2	1	2	2	1	2	3	2	3	3	2	73	3	4	4	3	4	4	3
1	1	1	2	3	1	1	1	3	3	2	3	2	3	4	3	3	3	3	2	3	3	3	2	3	3	3	3	2	3	3	3	2	3	2	2	2	2	3	2	3	2	91	3	2	2	3	3	2	3
1	4	3	1	3	0	0	0	1	2	2	2	2	2	2	2	1	3	1	3	1	1	2	3	2	2	2	2	2	2	3	3	2	2	2	2	2	2	3	2	2	2	69	4	3	2	3	4	3	4
2	1	1	1	3	0	0	0	2	3	2	1	1	2	2	2	2	2	2	2	2	2	2	2	3	1	2	2	1	2	2	2	2	2	3	1	2	3	1	2	2	2	66	3	3	4	2	3	3	3
2	1	3	1	3	0	0	0	3	3	3	3	2	4	3	2	2	3	3	3	3	3	3	3	4	3	3	3	3	3	2	2	3	3	2	3	4	3	2	2	3	2	96	1	1	1	1	1	1	1
2	3	1	1	3	0	0	0	2	3	3	2	3	3	3	3	3	3	3	2	3	3	2	2	3	3	4	3	2	3	3	2	2	4	2	3	3	3	3	4	2	3	95	3	3	2	3	3	3	2
2	1	1	1	3	0	0	0	3	2	3	2	3	2	3	2	2	2	2	3	3	2	3	3	3	3	3	3	3	2	2	2	2	2	2	2	3	1	3	3	3	2	84	4	4	3	4	4	3	4
2	3	1	2	3	0	1	0	2	1	3	2	2	2	3	2	2	2	3	3	3	3	2	3	3	2	2	2	2	2	1	3	2	2	2	2	2	2	3	2	2	2	76	3	3	3	3	3	3	4
1	4	1	2	3	0	1	0	3	3	3	3	3	3	3	2	3	3	2	3	3	3	2	2	3	3	3	4	3	3	2	3	3	3	3	3	4	3	3	3	3	3	99	2	1	1	2	1	1	1
1	1	3	1	3	0	1	0	2	2	2	2	3	3	2	4	3	4	3	4	2	2	3	3	4	3	2	3	2	2	2	3	2	2	2	2	2	3	2	2	2	3	87	1	3	1	3	3	2	2
1	3	1	2	3	0	1	0	3	3	3	3	2	3	4	3	3	3	3	2	3	3	4	2	4	3	2	3	2	2	3	3	3	3	2	4	2	3	3	3	3	2	97	3	4	3	3	4	2	3
2	3	1	1	3	0	1	0	3	2	2	3	3	2	3	2	2	2	3	3	3	2	3	3	3	2	3	2	3	3	2	2	3	3	2	2	3	3	4	2	3	3	89	4	4	4	3	4	4	4
2	4	2	1	3	1	0	0	2	1	2	1	2	2	3	2	2	3	2	2	2	2	2	3	3	2	3	2	2	2	2	2	2	1	1	2	1	2	1	2	2	2	67	3	3	4	3	3	4	3
2	2	3	2	3	1	1	0	2	2	2	3	3	2	2	2	2	2	2	1	2	2	2	3	2	2	1	2	3	2	3	2	3	3	3	3	2	2	1	3	2	2	75	4	4	4	4	4	3	4
2	2	3	2	3	0	0	1	4	3	3	2	3	3	3	3	3	3	3	3	3	3	2	3	3	3	3	4	3	3	4	3	2	3	3	3	2	3	3	3	4	3	102	3	4	4	4	4	3	3
1	1	2	1	3	0	1	1	2	3	2	2	2	2	2	2	1	2	2	2	2	2	2	3	3	2	2	2	2	2	2	2	2	2	2	1	3	2	2	3	2	2	71	2	3	2	3	3	3	4
1	1	1	1	3	0	1	1	3	2	3	2	3	4	3	2	2	3	1	3	3	2	3	3	2	3	3	3	2	2	3	3	3	4	3	2	2	2	3	3	2	3	90	2	2	2	2	2	2	3
1	1	1	2	3	0	0	0	3	2	2	2	3	2	3	3	2	3	3	2	2	3	3	2	2	3	3	2	3	2	3	3	3	4	2	2	2	2	3	4	2	4	89	3	3	3	3	3	4	3
1	3	3	1	3	0	0	0	3	2	2	2	3	2	2	2	4	3	3	2	2	2	2	3	2	2	2	3	2	2	2	2	3	3	3	3	3	2	3	2	2	3	83	3	3	2	2	2	3	3
2	3	2	2	3	0	0	0	2	2	2	3	3	2	3	1	2	2	2	3	3	2	3	2	3	4	2	3	2	1	2	3	3	2	4	3	3	3	2	2	2	2	83	2	3	3	3	2	3	3
1	4	3	1	3	0	0	0	2	1	2	3	3	3	3	3	2	3	1	3	3	2	2	3	3	3	1	2	2	2	2	2	2	2	1	3	2	2	1	1	2	2	74	3	2	3	2	2	2	2
1	4	2	1	3	0	1	0	3	3	3	2	3	3	2	3	2	3	3	3	3	3	3	2	3	3	2	3	2	3	3	2	3	3	2	3	2	3	2	2	3	2	90	4	4	4	4	3	3	3
2	2	3	2	3	0	1	0	3	3	2	3	3	2	2	2	2	1	3	2	3	2	3	3	2	2	2	2	2	2	2	3	2	3	3	2	2	3	2	3	1	3	80	2	2	4	2	4	3	2
2	1	1	1	3	0	1	0	2	3	3	2	3	3	3	3	3	2	3	2	2	3	3	2	3	3	2	3	3	3	3	3	2	1	2	3	2	2	2	3	3	2	87	3	3	3	3	2	2	2
1	3	3	2	3	0	1	0	2	2	2	2	2	2	2	2	2	2	2	2	2	2	2	2	3	2	2	2	2	2	2	2	2	1	3	2	3	2	2	3	2	2	71	4	2	3	3	4	3	4
1	3	2	1	3	0	1	0	3	3	3	3	3	3	3	2	3	3	3	3	3	3	3	2	3	3	2	3	3	3	3	3	2	2	3	2	2	2	3	3	4	3	95	2	2	3	1	3	3	2
1	3	2	1	3	0	1	0	1	3	2	3	2	2	3	2	2	3	2	2	2	2	3	2	1	3	3	2	2	3	3	2	4	2	2	1	2	3	2	3	3	2	79	2	2	3	2	2	2	2
2	2	1	1	3	1	0	0	3	3	2	3	3	3	3	2	3	3	3	2	2	2	3	4	3	3	2	3	3	2	1	2	3	3	3	4	3	4	3	2	3	3	94	3	4	3	3	3	4	3
2	3	3	1	3	1	0	0	2	3	2	3	2	2	3	2	3	3	3	3	3	3	3	2	2	3	2	2	3	2	3	2	2	3	2	3	3	4	2	4	3	3	90	2	3	1	2	1	2	2
1	3	3	2	3	1	0	0	3	3	3	2	3	3	3	2	2	4	2	3	3	3	3	3	3	4	3	3	3	3	3	3	3	3	3	3	3	4	3	3	3	3	101	4	3	3	2	3	4	3
2	2	1	2	3	1	0	0	2	1	3	3	2	2	2	2	3	3	2	3	2	3	2	3	3	2	2	3	2	3	2	3	4	3	2	1	3	2	2	2	2	2	81	4	4	3	4	4	3	3
1	3	1	1	3	1	1	0	3	2	2	2	2	2	3	4	2	2	3	2	2	3	2	3	2	2	3	2	3	2	2	2	2	3	3	3	2	3	2	3	3	2	83	4	4	4	3	4	4	4
1	1	2	1	3	1	1	0	2	2	2	2	3	3	3	2	3	3	3	3	2	2	3	3	3	4	3	2	2	2	3	4	2	2	3	3	3	3	3	2	3	3	91	4	3	4	3	3	3	3
2	3	3	2	3	1	1	0	3	3	3	2	3	3	4	2	3	3	3	1	3	3	2	4	3	2	3	3	2	3	2	3	4	3	3	3	2	2	3	3	3	2	94	3	3	2	3	2	2	2
2	1	3	2	3	1	1	0	3	2	3	3	3	3	3	2	3	2	2	2	3	3	3	3	3	4	3	4	3	3	2	4	3	3	3	3	2	3	3	2	4	3	98	2	1	2	2	2	2	2
2	1	3	1	3	0	0	1	3	3	3	3	3	2	3	3	3	3	3	2	3	3	3	3	2	3	2	3	3	3	3	3	4	3	3	4	3	2	3	3	3	3	99	3	3	3	3	3	3	3
2	1	1	2	3	0	0	1	3	3	2	3	3	4	3	2	3	2	2	3	2	2	3	2	3	3	3	3	3	3	2	2	3	3	2	3	3	2	3	3	2	2	90	3	2	2	1	2	2	2
2	1	3	1	3	0	0	1	2	3	2	2	2	2	2	3	3	2	3	3	3	3	2	2	2	2	1	2	3	3	3	3	2	3	3	2	2	3	2	3	3	3	84	4	4	3	3	3	3	3
2	2	2	2	3	0	0	1	2	4	2	2	1	3	2	2	2	3	2	2	2	3	3	2	2	2	3	2	2	3	2	1	2	2	3	3	3	2	2	2	2	2	77	3	2	3	2	2	3	2
2	2	2	1	3	0	1	1	2	2	1	3	2	2	2	3	2	2	2	2	1	2	2	2	3	2	3	2	2	3	2	3	3	2	3	2	2	2	2	2	2	2	74	4	4	3	3	4	3	4
2	1	1	1	3	0	1	1	3	2	3	3	2	2	2	2	2	1	2	2	2	2	3	2	3	2	2	3	3	1	2	2	3	2	2	2	2	1	1	3	2	2	73	3	4	4	4	4	4	4
1	2	2	2	3	0	1	1	2	3	2	3	3	3	2	2	3	2	3	2	3	2	2	3	2	2	2	3	2	3	2	2	3	2	3	3	3	3	3	3	3	2	86	3	3	4	3	2	3	3
1	2	2	2	3	0	1	1	2	2	2	2	2	2	2	2	3	2	2	2	3	2	2	2	2	2	3	2	1	2	2	2	2	3	3	2	2	2	3	3	2	2	74	4	4	4	4	4	4	4
2	2	2	2	3	0	1	1	2	3	3	2	2	3	3	1	3	2	2	2	2	2	3	2	2	3	2	3	4	1	3	2	3	2	3	2	2	2	2	2	2	2	79	4	3	3	3	3	3	4
2	1	1	1	3	1	0	1	2	3	2	3	3	2	2	2	3	3	2	3	3	3	2	2	2	3	2	2	2	3	2	3	2	3	2	2	3	1	1	3	2	2	80	4	3	4	3	3	4	4
1	3	3	2	3	1	0	1	2	3	3	3	3	2	2	3	3	2	3	3	3	3	2	2	3	2	3	3	3	2	3	2	3	3	3	2	3	2	3	2	2	3	89	2	2	3	3	3	3	4
2	3	1	1	3	0	0	0	1	2	1	1	2	2	3	3	2	2	1	3	2	2	2	1	2	2	2	3	2	2	2	2	2	2	2	2	3	2	2	1	1	2	66	3	4	3	4	3	4	3
2	2	2	2	3	0	0	0	2	2	2	2	2	2	2	3	2	2	2	3	2	3	2	3	2	2	3	2	2	3	2	2	2	2	3	3	3	2	2	2	2	3	78	4	4	4	4	4	3	4
1	1	1	2	3	0	0	0	2	2	2	2	2	2	1	2	1	2	2	2	2	3	2	2	2	1	3	2	2	2	3	2	3	2	2	2	1	2	1	2	2	3	68	3	3	3	3	3	3	3
2	4	2	1	3	0	0	0	2	4	2	2	1	2	2	3	2	3	3	2	2	2	2	2	2	3	3	3	2	3	3	3	2	2	3	3	3	3	3	2	1	3	83	2	2	3	3	2	2	3
1	3	1	1	3	0	0	0	1	2	2	1	2	2	1	2	2	2	2	2	2	2	2	3	3	3	2	2	2	2	1	2	2	3	2	1	2	2	2	2	2	1	66	3	2	3	3	3	3	2
1	3	3	2	3	0	0	0	3	3	2	2	2	3	3	2	2	3	3	3	3	3	4	4	3	3	3	3	3	3	3	4	3	3	3	4	2	3	3	2	3	3	99	3	3	2	3	2	3	4
2	3	1	1	3	0	1	0	2	3	3	2	3	2	2	3	3	3	3	3	3	3	2	2	3	3	2	2	3	2	2	2	2	3	2	2	2	3	2	2	1	2	82	2	3	3	3	3	3	3
1	1	1	2	3	0	1	0	3	3	2	1	3	2	2	3	3	1	2	3	2	4	2	2	3	3	2	2	2	3	1	3	2	2	2	1	2	2	3	2	1	3	77	4	4	3	3	3	4	3
1	1	2	1	3	0	1	0	3	2	2	2	2	2	2	2	3	2	2	2	1	3	3	3	2	2	3	2	2	3	2	2	3	2	3	3	2	2	2	2	2	3	78	4	3	4	3	3	4	3
1	2	1	2	3	0	1	0	3	4	3	3	3	3	2	3	2	3	2	3	2	3	3	3	1	3	3	2	3	2	2	3	2	2	3	3	2	3	3	2	3	2	89	4	3	2	3	3	3	3
1	4	1	2	3	0	1	0	2	2	2	3	2	2	3	2	3	1	3	2	3	2	2	3	2	2	2	2	2	2	3	2	3	3	2	3	3	3	3	3	2	3	82	3	3	4	3	3	4	4
2	1	2	1	3	0	1	0	2	3	3	3	2	3	2	2	2	2	2	3	2	3	3	3	4	2	2	3	2	3	2	2	2	2	2	3	2	3	2	3	3	2	84	4	3	3	4	3	3	4
2	2	2	2	3	0	1	0	2	3	3	2	2	2	2	2	3	3	3	2	4	3	2	3	4	2	3	2	2	4	3	2	2	3	3	3	3	2	2	2	3	3	89	1	2	2	1	2	1	1
1	3	2	2	3	0	1	0	1	3	2	2	2	3	2	2	2	3	3	2	3	3	2	3	2	3	3	3	3	2	3	2	3	2	3	3	2	2	3	3	3	2	85	2	2	3	3	2	3	4
1	1	3	1	3	1	0	0	2	3	2	3	2	3	2	3	2	3	3	3	3	3	3	3	3	2	3	3	3	3	3	3	2	3	3	3	3	3	2	3	3	2	93	2	3	4	3	3	3	2
2	3	3	1	3	1	0	0	2	2	2	3	2	2	2	2	2	3	3	3	1	3	2	2	1	1	2	2	2	2	1	2	3	3	2	2	1	2	3	2	2	2	71	3	3	3	3	3	3	3
2	1	3	2	3	1	0	0	3	2	3	2	3	3	3	2	3	3	2	3	2	2	1	3	3	3	3	3	3	2	3	2	3	3	3	2	2	2	3	2	2	3	87	2	2	2	3	3	2	3
2	1	3	2	3	1	1	0	2	2	2	3	2	2	3	2	3	3	2	2	2	3	3	2	3	2	4	3	3	2	4	2	2	2	3	2	2	4	2	2	2	3	85	3	2	2	3	4	3	4
1	3	2	2	3	0	0	1	2	3	3	2	1	2	2	2	2	2	2	3	2	3	2	3	2	3	2	3	3	3	2	2	2	2	2	1	2	2	2	2	2	3	76	2	2	2	2	2	2	2
2	2	1	2	3	0	0	1	3	2	3	4	2	3	3	2	3	2	3	3	3	3	2	2	4	2	3	3	2	3	2	2	2	2	2	2	2	3	2	3	3	2	87	2	2	3	2	2	3	2
1	3	2	1	3	0	0	1	3	3	2	2	1	2	3	2	2	3	2	1	2	3	2	2	2	2	2	2	2	1	2	2	1	1	2	2	2	2	2	2	3	2	69	3	3	3	3	2	3	3
1	2	2	2	3	0	0	1	3	2	3	3	2	3	2	2	3	2	2	2	3	3	1	3	2	3	2	2	2	2	3	2	2	3	3	2	3	3	2	2	2	2	81	2	3	2	2	3	3	3
2	4	3	1	3	0	1	1	3	3	3	2	3	2	2	3	4	2	3	2	2	3	2	3	3	3	3	3	3	3	3	3	3	3	3	3	3	3	2	2	3	4	95	2	3	3	2	2	3	3
2	1	2	2	3	0	1	1	3	2	3	2	2	2	2	3	3	2	1	1	2	2	2	2	2	3	3	2	2	2	3	2	3	2	2	3	3	3	2	2	3	2	78	4	4	4	4	4	3	3
2	1	1	2	3	0	1	1	3	2	2	2	2	3	3	3	3	2	3	1	3	3	3	3	3	4	2	3	2	2	3	3	3	2	2	3	3	3	3	3	2	3	90	2	2	3	3	1	2	2
2	2	1	2	3	1	1	1	3	3	2	3	2	2	2	2	3	2	2	3	2	2	2	2	2	2	2	2	1	2	2	2	2	2	2	2	2	2	2	1	2	2	71	3	3	3	3	3	3	3
2	2	2	1	2	1	1	1	4	3	3	2	3	4	2	3	2	3	3	2	4	3	3	3	2	4	3	2	2	3	4	3	2	3	3	3	3	2	2	3	3	3	97	1	2	2	2	2	3	2
2	3	2	2	2	1	1	1	2	4	3	2	2	3	3	2	2	2	2	2	3	2	3	2	2	2	2	2	3	2	2	2	2	2	2	2	2	2	2	2	2	2	76	4	3	4	3	4	4	3
1	1	1	2	2	1	1	1	2	2	2	2	2	3	4	3	3	3	2	2	3	2	3	3	3	2	3	3	2	3	3	2	2	3	2	3	2	4	2	3	2	3	88	3	4	3	3	4	4	3
1	2	2	1	1	0	0	0	3	3	3	2	3	3	4	2	3	2	3	2	3	3	1	2	2	2	3	3	3	3	3	3	3	2	3	3	2	2	3	4	2	3	91	3	3	3	3	4	2	3
2	1	2	2	3	0	0	0	3	4	2	2	3	3	2	3	4	2	3	3	2	2	3	2	3	2	3	2	3	2	2	2	2	3	2	2	2	3	2	2	2	3	85	2	1	2	2	2	2	2
2	3	1	1	2	0	0	0	2	2	2	1	2	3	2	2	3	2	2	1	2	2	2	3	2	2	2	3	2	3	3	3	2	2	2	3	2	2	2	3	2	1	74	4	4	3	3	4	2	3
2	1	3	2	2	0	0	0	2	3	3	3	3	3	4	3	3	2	3	2	3	2	3	2	3	3	3	3	3	3	2	4	3	4	2	3	3	3	2	2	3	2	95	2	4	3	4	4	4	4
1	2	1	1	1	0	1	0	2	3	3	2	2	2	3	3	3	3	3	2	2	3	3	3	2	2	1	2	3	3	2	3	3	2	3	3	3	2	3	2	3	3	87	3	4	3	4	3	3	3
1	2	2	1	3	0	1	0	2	3	3	2	2	2	2	2	3	2	2	3	2	2	2	2	2	2	3	3	2	3	3	3	3	3	3	2	2	3	3	3	2	2	83	4	4	4	4	4	4	4
2	4	1	2	3	0	1	0	3	2	2	3	2	2	1	2	2	2	3	2	2	3	3	2	3	2	3	3	3	2	3	2	2	2	2	2	2	2	2	2	1	2	76	2	3	3	2	2	2	3
2	4	3	1	2	0	1	0	3	2	1	3	2	3	2	2	2	1	3	3	2	2	2	2	2	3	2	3	2	3	2	2	3	3	2	2	2	2	2	3	3	2	78	4	4	3	4	4	4	4
2	3	2	1	2	0	1	0	3	2	2	3	2	3	2	3	2	3	3	2	1	2	2	3	3	3	2	3	2	2	3	2	2	2	3	1	2	2	3	3	3	2	81	4	4	3	4	3	3	4
1	4	2	1	2	0	1	0	3	3	3	2	2	3	3	2	3	2	3	2	3	2	3	3	3	3	3	3	3	3	2	3	2	3	3	4	2	3	2	3	3	3	93	1	1	1	1	2	2	2
1	4	2	1	2	0	1	0	3	2	3	3	3	3	2	3	2	2	1	2	3	2	4	3	2	2	3	2	3	3	3	2	3	2	3	3	2	2	2	2	3	3	86	3	4	4	4	3	4	4
1	3	1	2	2	0	1	0	2	3	3	3	3	3	2	3	3	3	2	2	2	3	2	2	2	2	2	2	3	2	2	3	3	2	3	2	2	4	3	2	3	1	84	4	4	4	4	4	4	4
2	2	1	1	1	1	0	0	2	3	3	2	3	3	3	3	3	2	2	3	2	2	3	2	2	3	2	1	2	3	4	3	3	3	3	3	3	2	3	3	2	3	89	3	3	4	3	3	3	4
2	3	3	2	1	1	0	0	1	2	2	3	3	2	3	3	3	2	2	2	2	3	3	2	2	3	2	2	2	2	2	2	2	2	2	3	2	2	3	1	2	2	76	2	2	1	1	2	2	2
1	4	3	1	2	1	0	0	3	3	3	2	3	3	3	3	4	2	3	3	2	2	2	2	2	3	3	3	3	3	3	3	3	3	3	3	3	3	4	3	3	2	96	2	2	1	2	2	2	2
2	4	2	2	2	1	1	0	3	3	2	3	3	2	3	4	2	3	3	3	3	3	2	3	2	3	2	3	4	4	3	2	3	3	3	2	3	3	3	3	2	2	95	2	2	2	2	2	2	1
2	3	3	2	1	0	0	1	3	3	3	2	2	3	3	3	3	4	3	3	2	3	3	2	2	3	2	3	2	3	3	4	3	4	3	2	3	4	3	3	3	2	97	3	2	2	3	2	2	2
2	3	3	2	2	0	0	1	3	3	3	3	3	3	3	3	1	4	3	3	2	3	2	3	2	2	3	3	2	3	3	2	3	3	3	3	3	1	3	4	2	2	92	3	3	2	3	2	2	3
1	1	2	2	2	0	0	1	3	2	3	3	3	3	3	2	3	3	2	3	3	2	3	3	3	3	3	3	3	3	3	3	3	3	3	2	3	3	3	3	3	2	96	4	3	3	3	3	3	3
1	1	3	1	3	0	1	1	3	2	1	2	2	2	2	2	4	1	3	1	2	1	3	2	3	3	2	2	2	2	2	2	3	2	3	2	2	2	2	2	2	3	74	1	3	3	3	2	2	3
2	1	1	1	2	0	1	1	2	2	3	2	2	2	2	2	2	3	2	2	2	3	3	2	2	2	3	2	3	2	3	2	2	2	3	2	2	3	1	2	2	2	76	3	4	1	2	2	2	1
2	4	3	2	2	1	0	1	3	3	2	2	4	2	3	3	3	3	3	2	3	2	3	3	3	3	2	3	3	2	2	2	2	2	3	3	3	2	3	2	2	3	89	3	3	3	3	3	3	3
1	1	1	1	3	0	0	0	2	2	2	2	2	2	3	3	2	2	3	2	3	2	2	3	2	3	3	3	2	1	3	3	2	2	2	2	3	2	2	2	3	3	80	4	4	3	4	4	3	4
2	1	2	1	1	0	1	0	2	2	2	3	2	2	3	3	2	2	2	2	3	3	3	3	2	3	3	2	3	3	3	3	3	2	2	3	2	2	2	3	3	3	86	3	3	3	3	4	3	3
1	3	1	2	1	0	1	0	2	3	3	3	3	3	2	2	3	3	3	3	2	2	3	3	2	2	3	3	3	2	3	3	2	3	3	3	2	1	3	2	3	3	89	2	3	4	3	3	3	3
2	4	1	2	3	0	1	0	3	3	2	3	3	3	3	4	3	3	2	2	3	2	3	3	3	4	3	3	2	3	3	3	4	3	3	3	2	3	4	3	3	4	101	3	3	2	3	3	4	3
2	3	1	1	2	0	1	0	3	2	3	4	3	3	3	2	3	3	3	3	3	2	3	3	2	3	2	3	2	3	2	2	2	3	2	3	1	3	3	3	3	3	91	3	2	3	3	3	2	3
1	4	2	2	2	0	1	0	2	3	2	1	2	2	2	2	3	2	2	2	3	2	2	3	2	2	2	3	2	2	3	2	1	2	2	3	2	2	2	2	2	3	74	3	3	2	2	2	2	2
2	3	1	1	1	1	0	0	2	2	2	2	2	3	3	3	2	3	3	4	3	3	2	3	4	2	3	3	3	3	2	2	3	3	3	2	3	3	2	3	3	2	91	3	3	2	4	3	3	2
1	2	3	2	2	1	0	0	2	3	3	2	3	2	2	3	2	3	3	3	2	2	2	2	3	2	3	3	2	3	3	3	2	3	2	3	1	2	3	2	2	2	83	3	3	3	4	3	4	4
1	3	3	2	2	1	0	0	1	3	1	2	3	2	3	3	2	3	3	3	4	4	3	2	2	3	2	3	3	2	3	2	4	2	3	2	2	2	2	3	3	2	87	3	3	3	3	3	3	3
1	1	3	1	2	0	0	1	3	2	2	3	2	3	2	3	3	3	2	3	3	3	3	2	4	3	3	2	3	2	3	3	3	3	2	3	2	3	3	2	2	2	90	3	3	3	3	3	3	3
1	3	1	2	2	0	0	1	3	2	2	2	2	2	2	2	3	3	3	3	2	3	2	3	2	3	3	3	3	3	2	3	3	2	2	2	3	3	3	2	3	3	87	3	3	3	4	3	3	3
1	2	2	1	1	0	1	1	2	3	2	2	3	2	2	2	2	2	2	2	2	2	2	2	2	2	2	2	2	2	3	3	2	3	2	2	2	2	2	2	2	2	73	2	2	1	1	1	2	2
1	1	2	1	1	0	1	1	2	3	2	3	2	3	1	3	3	2	2	2	2	3	3	3	3	3	2	1	3	2	3	3	1	3	3	2	2	4	3	2	3	4	86	3	2	2	2	3	2	3
1	1	3	2	3	0	1	1	2	2	3	2	2	2	2	3	3	2	2	2	3	4	3	2	3	3	2	3	2	2	1	2	2	3	3	3	2	3	3	3	2	3	84	3	3	4	4	3	3	4
1	1	3	1	2	0	1	1	2	2	2	2	2	3	2	3	3	2	3	3	2	2	3	2	2	2	3	3	3	3	2	2	3	3	2	3	2	2	2	2	3	3	83	4	3	2	3	3	3	2
1	1	3	2	2	0	1	1	2	3	2	3	2	3	2	3	3	3	4	3	1	3	3	2	3	2	2	3	2	1	1	2	2	2	2	3	2	3	3	3	2	2	82	1	2	2	1	2	2	1
1	1	2	1	2	1	0	1	3	3	2	3	3	2	4	3	2	4	3	2	3	3	3	2	2	3	3	3	2	3	2	3	2	3	2	3	2	3	3	3	2	3	92	2	2	2	2	2	2	2
1	1	3	2	2	0	0	0	2	2	2	2	3	2	2	3	2	2	3	2	2	2	3	3	3	2	3	2	2	2	2	3	2	2	3	2	4	2	2	3	2	2	80	3	4	2	4	3	4	3
1	1	2	2	1	0	1	0	1	3	3	2	3	3	3	3	3	1	2	2	2	3	3	2	3	1	2	2	3	3	2	1	3	1	2	4	2	1	3	3	2	3	80	3	3	2	3	2	3	3
1	1	1	1	3	0	1	0	2	2	4	2	3	2	3	2	3	2	3	1	2	2	4	1	2	1	3	3	2	3	2	2	2	2	3	1	3	2	2	2	2	2	77	2	3	2	3	2	3	2
1	1	3	2	2	0	1	0	2	2	1	1	2	2	3	2	2	2	2	3	2	1	2	1	1	2	2	3	2	2	2	2	3	3	1	3	2	2	2	2	2	1	67	4	4	4	3	3	3	4
1	1	1	1	2	1	0	0	3	3	2	3	3	2	2	3	3	2	2	2	2	3	2	2	3	3	3	3	2	3	3	2	2	3	3	2	4	3	3	1	3	3	88	2	3	1	2	2	2	2
1	1	3	1	1	0	0	1	2	3	2	3	2	2	3	3	2	3	2	1	3	3	3	2	2	3	3	3	3	2	2	2	3	1	3	2	2	2	3	3	2	3	83	4	4	3	3	3	2	3
1	1	2	2	3	0	0	1	1	1	2	2	2	2	2	2	2	1	2	2	2	2	1	3	2	1	2	2	1	2	1	3	3	2	2	1	1	2	2	3	2	2	63	2	2	3	3	4	3	4
1	1	3	1	2	0	0	1	3	2	2	3	3	3	3	2	3	2	3	3	2	2	2	2	2	2	2	3	3	3	3	2	3	4	3	2	3	3	3	2	2	3	88	0	1	1	0	1	1	1
1	1	2	2	1	0	1	1	2	3	1	2	1	2	2	2	2	2	2	1	2	1	2	2	2	1	2	2	1	2	1	1	2	2	2	2	2	2	2	2	3	2	62	3	3	4	3	2	3	3
1	1	1	1	3	0	1	1	3	3	3	2	3	2	2	2	2	2	3	2	3	2	2	3	2	3	4	2	2	3	3	3	3	3	4	2	2	2	3	2	2	2	86	3	2	2	3	3	3	3
1	1	1	2	2	0	1	1	2	1	3	3	3	2	2	2	2	2	3	2	1	2	2	2	2	2	2	1	1	2	1	2	2	2	2	1	2	3	2	1	3	2	67	2	4	4	3	3	3	3
1	1	1	2	2	0	1	1	3	3	3	2	2	2	3	3	2	3	2	3	2	3	3	3	3	2	2	3	2	3	2	3	2	2	3	3	2	3	3	3	3	3	89	2	2	1	1	3	2	2
1	1	1	1	3	1	1	1	3	3	3	2	3	2	2	3	2	2	2	2	3	3	2	2	2	2	2	2	3	2	2	3	3	2	2	3	2	1	2	2	3	3	80	3	4	3	3	4	3	3
1	1	1	2	2	1	1	1	2	2	1	2	2	2	3	3	2	3	3	2	2	2	3	3	3	2	2	2	2	3	3	2	2	3	3	3	2	2	2	2	3	2	80	4	4	3	4	3	4	4
1	1	2	1	1	0	1	0	2	2	3	4	3	3	3	3	2	3	2	3	3	3	4	2	3	3	3	2	3	2	3	2	2	3	3	2	3	3	4	3	3	4	96	2	2	3	4	4	4	3
1	1	1	2	1	0	1	0	2	2	3	3	2	3	3	2	3	3	3	3	3	2	3	2	3	3	2	3	2	3	3	3	2	3	3	3	2	2	2	2	3	2	88	4	4	4	4	4	4	4
1	1	1	1	3	0	1	0	2	2	2	2	2	3	3	4	3	2	3	2	2	3	3	3	3	2	2	2	3	3	2	2	2	2	3	2	3	3	2	2	3	3	85	3	3	2	3	4	3	3
1	1	1	2	3	0	1	0	3	1	2	2	2	1	1	2	1	3	2	2	1	1	1	1	2	1	2	1	2	2	2	2	2	2	1	1	1	2	2	2	2	2	57	4	3	4	4	3	4	4
1	3	3	2	2	0	1	0	2	2	3	2	3	2	2	3	3	3	3	2	3	3	3	2	2	2	2	2	2	2	2	2	3	3	4	2	2	3	2	3	2	2	83	3	3	3	3	2	4	3
1	3	2	1	1	1	1	0	2	2	3	3	2	2	2	2	2	2	3	2	2	2	3	1	3	2	2	2	3	2	3	3	3	1	2	3	2	2	2	2	3	2	77	3	3	3	3	3	2	3
1	3	2	1	2	0	0	1	2	2	2	3	2	3	1	2	2	3	2	2	3	2	2	3	2	2	1	2	2	1	3	2	3	1	2	2	2	2	1	3	3	2	72	2	3	3	3	2	2	3
1	3	2	2	2	0	0	1	2	3	3	2	2	2	3	3	2	4	2	2	4	2	2	2	2	3	3	2	2	3	3	2	3	3	2	3	2	3	3	3	4	2	88	2	3	2	2	1	2	3
1	3	2	2	1	0	1	1	3	3	2	3	2	3	4	3	2	4	2	3	2	3	3	3	3	4	2	3	2	3	3	3	4	3	3	2	3	3	3	2	2	3	96	3	2	4	3	3	3	3
1	3	2	1	2	0	1	1	3	2	2	3	3	3	3	3	3	3	3	1	3	4	1	3	3	3	2	3	3	2	3	2	3	3	2	3	3	3	2	3	2	3	91	3	3	3	3	2	3	3
1	3	1	2	1	1	1	1	1	2	2	3	2	2	3	2	3	1	2	3	2	2	2	3	2	3	1	2	2	2	2	2	2	3	3	2	3	1	2	2	2	2	73	4	4	4	4	4	4	4
1	3	1	2	1	1	1	1	2	3	3	2	3	3	3	2	1	2	3	3	3	2	3	2	3	2	3	2	3	2	2	3	2	2	2	3	2	2	2	2	1	3	81	3	3	3	3	3	2	2
1	3	1	1	3	1	1	1	3	3	3	2	3	3	4	3	3	3	3	3	3	2	1	3	3	3	3	3	3	3	3	2	3	2	3	2	3	3	4	3	3	3	97	2	2	1	3	2	2	2
1	3	1	2	1	0	0	0	1	2	1	1	2	3	2	2	2	2	2	2	2	2	2	2	2	2	1	2	2	2	1	3	3	2	1	1	2	2	2	2	2	2	64	4	4	4	4	4	4	4
1	3	1	1	2	0	0	0	2	3	2	2	2	2	2	2	2	1	1	2	2	1	2	2	2	1	2	2	3	2	2	2	2	2	3	2	2	2	2	1	2	3	67	3	3	4	3	2	4	3
1	3	3	2	2	0	0	0	2	2	2	2	3	2	2	3	2	3	3	2	2	2	2	2	4	3	3	2	2	3	3	2	2	2	2	2	2	3	2	2	2	3	80	2	3	3	3	3	2	2
1	3	2	2	1	0	1	0	2	3	3	3	2	2	3	3	2	1	2	3	3	3	4	3	4	3	3	3	2	4	3	3	2	3	3	2	3	2	3	2	3	2	92	3	4	3	3	3	3	3
1	3	2	2	1	0	1	0	3	2	3	2	3	2	3	2	3	2	2	2	2	2	2	2	2	3	2	3	3	2	2	1	2	1	1	2	2	3	2	3	3	2	76	3	3	3	4	2	4	4
1	3	2	1	3	0	1	0	3	2	2	2	2	2	2	4	2	2	2	3	3	3	3	3	2	3	3	3	2	1	2	3	2	3	3	2	3	4	2	2	2	3	85	4	3	4	3	4	3	3
1	3	2	2	2	0	1	0	2	2	2	2	3	4	3	2	3	2	3	3	2	3	2	2	2	3	2	3	3	2	2	2	2	2	3	3	3	3	3	3	2	3	86	3	4	2	3	4	3	2
1	3	1	2	2	0	1	0	2	2	3	2	3	3	4	4	3	3	3	3	3	3	2	3	3	3	3	3	3	3	3	3	3	4	3	3	3	3	3	4	3	3	102	3	3	2	3	2	2	2
1	3	1	2	1	1	0	0	2	1	1	2	1	2	2	2	2	2	2	3	2	2	3	2	2	4	2	2	2	1	3	3	2	2	3	2	2	3	2	3	3	3	75	2	3	4	4	4	4	4
1	3	1	1	2	1	1	0	2	2	2	2	3	2	3	2	2	3	2	3	2	2	3	2	3	2	3	2	2	2	3	2	2	3	3	2	3	4	2	2	3	2	82	3	2	3	3	3	2	3
1	3	1	1	2	1	1	0	3	2	2	2	2	2	1	1	2	3	2	2	1	2	2	2	2	2	2	3	2	1	2	2	2	1	1	2	2	2	3	2	1	1	64	3	3	3	3	4	3	3
1	3	1	1	1	0	0	1	3	3	2	4	3	2	4	3	2	2	1	2	3	3	3	4	3	3	3	2	3	2	2	3	2	2	3	3	3	3	3	3	3	2	92	4	4	3	4	4	3	4
1	1	3	1	2	0	0	1	3	2	2	2	2	2	2	2	2	3	2	2	2	3	2	2	2	2	2	2	2	2	2	1	2	2	2	2	2	3	2	3	2	2	72	4	4	4	2	4	3	4
1	1	2	2	1	0	1	1	2	2	2	2	3	2	2	1	2	3	4	2	1	2	2	2	2	2	2	2	2	2	1	2	2	2	2	2	1	2	2	2	2	2	68	3	3	2	3	2	2	3
1	1	2	2	3	0	1	1	3	1	2	2	3	2	2	1	2	2	2	2	2	2	3	3	2	2	3	2	2	3	2	2	2	2	2	1	3	2	1	2	3	1	71	3	2	2	3	2	3	3
1	1	2	1	2	0	1	1	3	2	3	4	3	2	2	3	1	3	3	2	2	4	3	3	2	3	3	4	2	3	3	3	3	3	3	3	2	3	2	3	2	3	93	3	2	3	3	2	3	3
1	1	1	2	2	1	0	1	2	2	2	1	1	2	2	2	2	2	2	2	1	2	2	2	2	1	2	1	1	2	2	2	2	1	3	2	1	2	3	2	1	2	61	3	4	4	3	3	4	4
1	1	2	1	1	0	0	0	3	2	3	2	3	3	2	2	2	2	3	2	3	2	3	3	3	2	3	3	2	4	3	2	3	3	2	3	2	2	3	3	1	3	87	3	4	3	3	2	3	2
1	1	1	1	1	0	1	0	3	4	3	3	2	2	3	3	4	4	3	3	2	3	3	3	3	3	3	3	4	3	3	3	3	2	3	2	3	3	4	3	3	3	102	3	3	4	3	3	3	3
1	1	3	2	1	0	1	0	3	2	3	2	3	2	2	3	2	2	3	3	3	2	3	1	2	3	2	3	2	3	2	2	3	3	2	3	2	2	2	2	1	3	81	2	2	2	2	3	3	3
1	1	1	1	3	0	1	0	3	2	3	3	2	3	3	3	3	3	3	1	3	3	3	3	2	3	2	2	3	3	1	3	3	3	3	2	3	2	3	2	2	3	89	3	2	3	4	3	3	2
1	1	3	2	2	0	1	0	1	2	2	3	1	2	2	1	2	3	2	1	1	3	2	3	3	2	2	2	2	2	2	2	3	1	2	3	1	1	1	1	1	2	64	3	3	3	4	2	3	4
1	1	2	2	2	0	1	0	2	2	3	2	3	1	1	2	3	3	2	1	2	3	2	1	2	2	3	2	2	2	2	1	2	3	3	2	3	2	2	2	3	4	75	3	4	4	3	3	3	3
1	1	1	2	2	0	1	0	2	2	1	2	3	1	3	3	2	1	3	3	1	1	3	2	2	1	2	2	1	2	2	2	2	2	3	1	2	1	3	2	2	3	68	4	3	3	3	3	4	3
1	2	2	2	1	1	0	0	3	2	3	2	2	2	3	3	2	3	2	3	2	2	3	2	2	2	3	3	1	2	2	2	2	3	2	3	3	3	2	3	3	3	83	3	3	3	3	2	2	2
1	2	2	2	2	1	0	0	3	3	2	3	2	3	3	3	4	2	2	3	3	3	3	3	3	3	2	3	2	4	4	3	3	4	3	2	3	3	3	4	2	3	99	3	3	3	4	3	3	4
1	2	1	1	1	0	0	1	2	2	3	3	2	2	2	2	2	2	3	2	2	3	3	2	1	3	2	3	3	3	3	2	3	1	3	2	1	2	1	2	2	2	76	3	3	4	3	2	3	2
1	2	2	2	3	0	0	1	3	2	2	2	3	2	2	3	1	1	2	1	2	2	2	2	3	2	2	2	2	2	1	2	2	2	2	2	3	2	2	2	2	3	70	3	4	3	4	3	4	4
1	2	2	1	1	0	1	1	3	3	3	2	2	1	1	2	1	2	2	2	1	3	2	3	1	3	2	1	2	2	2	2	3	3	3	2	2	2	1	2	2	2	70	4	4	4	4	4	4	4
1	2	3	2	3	1	0	1	1	2	2	2	2	3	2	1	2	2	2	2	2	3	2	2	2	2	1	2	3	2	2	2	3	2	2	1	3	2	2	2	2	2	69	4	4	4	3	4	4	4
1	2	1	1	2	1	1	1	3	1	3	2	2	3	3	2	3	2	2	3	2	3	2	3	2	2	3	2	3	2	3	2	3	3	2	3	2	2	2	2	2	2	81	3	3	4	3	3	3	3
1	2	2	2	2	1	1	1	3	3	3	2	3	3	3	2	3	2	3	3	3	3	2	2	3	3	3	3	3	2	3	3	4	3	2	2	3	3	4	2	4	3	96	3	2	3	3	3	2	3
1	2	1	2	2	1	1	1	2	1	2	2	2	2	2	3	2	2	2	3	2	2	2	3	3	1	2	2	2	2	2	3	2	2	1	1	2	2	3	2	2	1	69	4	3	4	4	3	3	3
1	2	3	1	2	0	0	0	2	2	4	3	2	3	2	2	3	2	3	3	3	1	2	2	3	2	3	3	3	3	2	3	3	2	2	2	3	3	3	3	3	3	88	3	3	3	3	3	3	4
1	2	3	1	1	0	1	0	2	2	3	3	3	3	3	3	2	2	2	3	2	2	3	2	1	2	2	2	3	2	2	3	3	3	3	3	2	3	2	2	2	2	82	4	4	4	4	3	4	4
1	2	2	2	2	0	1	0	2	3	2	2	2	2	3	3	2	3	2	2	2	2	2	3	2	2	2	2	2	2	1	2	3	2	2	3	2	3	2	3	2	2	76	3	4	3	3	4	4	3
1	2	3	2	3	1	0	0	2	3	3	3	3	3	3	3	2	2	2	3	3	3	3	3	4	2	3	2	3	2	2	3	2	3	2	2	2	2	3	2	2	2	87	3	3	4	3	4	4	4
1	2	2	2	1	1	1	0	2	2	2	3	2	4	2	2	1	2	2	3	3	3	3	3	2	3	3	2	2	2	3	2	2	2	2	2	2	2	2	3	2	2	79	3	3	3	3	2	3	3
1	1	2	2	3	1	1	0	2	2	2	2	2	3	2	2	3	2	3	3	1	2	3	2	2	3	2	3	3	2	3	3	2	3	3	2	3	2	3	2	3	2	82	4	4	4	4	4	4	4
1	1	2	1	1	0	1	1	2	3	2	2	2	2	2	2	2	2	2	3	2	2	1	2	2	2	3	2	2	2	2	2	3	2	1	3	1	2	2	1	2	2	69	2	4	3	3	3	4	3
1	1	2	2	3	0	1	1	2	3	3	2	3	3	3	2	2	3	3	3	2	2	3	3	2	3	3	2	2	2	3	3	2	2	2	3	3	3	2	2	3	2	86	4	3	3	2	3	3	3
1	1	2	2	1	0	0	0	2	1	1	2	1	2	2	3	2	2	1	2	1	2	2	2	1	1	1	2	1	3	3	2	2	1	2	3	2	2	2	2	2	2	62	3	3	3	3	2	2	3
1	1	1	1	1	0	1	0	3	3	3	3	3	2	3	4	2	2	3	2	3	2	3	3	3	3	2	3	3	3	2	3	3	2	3	2	2	3	3	2	3	3	92	3	2	2	3	2	3	2
1	1	2	1	3	0	0	1	3	2	2	2	2	2	2	3	3	2	2	2	3	3	2	2	2	3	1	3	3	3	3	2	2	2	2	2	3	3	3	2	2	2	80	4	3	4	3	4	3	3
1	1	1	1	2	0	0	1	3	2	2	3	3	3	2	3	3	3	2	3	3	3	3	3	2	3	3	3	3	3	3	2	3	2	2	2	4	3	3	3	3	4	95	2	3	3	2	3	3	3
1	1	1	1	2	0	1	1	2	3	3	3	3	2	3	2	3	3	2	2	2	3	3	3	3	2	3	3	3	3	3	3	4	2	3	2	2	2	2	4	2	3	91	3	2	3	2	3	4	3
2	1	3	2	3	1	0	1	2	2	2	3	2	2	2	2	2	3	2	2	2	2	2	2	3	2	2	2	2	2	2	3	2	1	2	1	2	3	2	1	2	2	70	2	2	3	4	3	3	4
2	4	2	2	1	0	0	0	2	3	2	2	3	1	2	2	2	2	3	2	3	1	2	2	2	2	3	3	3	3	3	3	1	2	2	3	2	2	3	3	3	2	79	3	3	4	3	3	2	3
2	4	2	1	2	0	0	0	2	3	2	3	2	2	2	2	1	2	2	2	2	3	3	2	2	3	2	2	3	2	3	1	2	2	3	3	3	1	2	2	2	1	74	2	4	4	3	3	4	3
2	4	3	2	2	0	0	0	2	2	2	4	3	3	2	3	2	3	3	3	2	2	4	2	3	3	1	3	3	3	3	3	3	3	2	2	3	3	2	2	3	3	90	3	3	3	4	4	3	3
2	4	2	1	1	0	1	0	3	3	2	3	3	3	2	3	2	2	2	3	2	2	3	2	2	3	3	2	3	3	2	2	3	2	3	3	3	2	2	2	3	3	86	3	3	3	3	3	3	4
2	4	1	1	1	0	1	0	3	2	3	2	3	4	3	2	1	2	2	2	3	3	3	3	3	2	3	2	3	3	2	3	2	2	2	3	3	3	2	2	3	3	87	3	3	3	4	2	3	3
2	4	2	2	1	0	1	0	2	1	3	3	3	3	2	2	2	3	2	2	2	3	2	3	3	2	3	3	3	3	2	3	2	1	3	2	2	3	2	2	3	2	82	3	4	3	2	4	3	4
2	4	1	2	1	0	1	0	2	3	2	2	2	2	3	3	2	2	3	3	2	2	3	2	2	3	2	3	2	4	2	2	3	2	2	4	2	3	3	2	2	2	83	3	3	3	3	4	3	3
2	4	1	2	2	0	1	0	4	3	3	3	3	2	2	2	2	4	3	3	2	3	2	3	2	3	3	3	3	3	2	2	2	3	1	2	2	3	2	3	3	3	89	3	3	3	3	3	2	2
2	4	1	2	2	1	0	0	2	3	2	3	3	2	2	3	3	2	2	3	3	2	3	3	3	2	3	2	3	2	3	3	3	2	2	2	2	3	3	2	2	2	85	3	2	3	3	2	3	2
2	4	3	2	2	1	1	0	3	2	4	3	3	2	3	3	3	2	3	3	2	2	3	4	2	3	2	4	3	3	3	3	3	3	2	3	3	3	3	3	3	3	97	2	3	2	3	2	3	3
2	4	3	2	1	0	1	1	2	3	3	3	2	3	2	2	3	2	3	3	2	3	3	2	3	3	3	2	3	2	3	3	3	2	3	2	3	3	2	3	2	3	89	2	2	3	2	2	2	2
2	4	1	1	2	0	1	1	2	2	2	2	3	1	2	2	2	2	3	3	3	3	3	2	3	3	2	2	3	3	3	2	2	3	3	3	3	1	2	2	3	3	83	3	4	4	4	4	3	4
2	4	2	2	2	0	0	0	2	3	1	2	2	2	3	1	3	2	2	2	3	3	1	2	2	3	3	3	1	2	2	2	2	2	3	3	3	2	2	3	2	2	76	4	4	4	4	4	4	4
2	4	3	1	1	0	1	0	3	4	2	2	3	2	3	4	3	3	3	4	3	3	3	2	2	3	3	3	2	3	2	3	3	3	3	2	3	3	3	2	3	3	96	3	2	4	2	3	3	4
2	4	2	1	1	0	1	0	3	2	2	3	2	4	3	4	2	2	4	2	3	2	2	2	3	3	4	3	3	3	2	2	3	2	3	2	2	3	2	2	3	2	89	4	4	4	3	3	4	3
2	4	2	2	1	0	1	0	3	3	2	3	3	3	2	2	2	3	2	3	2	2	2	2	2	3	2	2	1	3	2	2	3	2	2	3	3	1	2	3	2	2	79	2	2	3	3	3	4	2
2	4	2	2	3	0	1	0	2	2	2	2	1	2	2	2	2	2	2	2	3	2	2	1	2	1	1	2	2	1	2	2	2	1	1	1	2	2	2	1	1	2	59	4	4	4	4	4	3	4
2	4	2	2	2	0	1	0	3	3	3	2	3	3	3	2	2	2	3	2	3	3	2	2	3	2	2	3	4	2	2	2	2	3	4	3	2	1	2	3	3	2	86	4	4	4	4	4	4	4
2	4	1	2	2	0	1	0	3	2	3	1	2	3	2	3	1	3	4	3	2	2	3	2	3	3	2	2	3	2	3	2	2	4	3	3	2	3	2	3	3	3	87	3	2	3	2	3	3	3
2	4	2	2	2	1	0	0	4	3	3	4	3	3	4	2	3	2	3	4	4	4	2	3	4	3	3	3	3	3	3	3	3	4	4	3	4	3	3	3	3	4	110	1	1	1	1	1	2	2
2	1	3	2	2	1	1	0	2	1	2	3	2	1	2	2	2	2	2	2	1	2	2	3	2	2	2	2	3	2	2	2	1	2	2	2	1	2	1	3	2	2	66	3	4	4	3	3	3	3
2	1	1	2	2	0	0	1	1	2	2	2	2	2	2	1	2	2	3	3	2	2	2	2	3	3	2	2	2	2	2	1	1	2	2	2	1	2	1	1	2	2	65	3	3	2	2	2	3	2
2	1	3	1	1	1	1	1	2	2	2	1	2	1	2	2	2	2	2	2	2	2	2	1	2	1	2	1	2	2	2	2	2	2	2	2	2	3	2	2	3	3	66	4	3	4	4	4	3	4
2	2	3	1	1	0	0	0	3	2	3	1	2	1	2	3	3	2	3	2	2	2	2	3	2	3	3	2	2	3	1	2	2	3	2	2	2	1	2	3	3	3	77	3	3	4	2	3	3	3
2	1	2	2	2	0	0	0	2	2	2	3	2	2	2	2	3	2	1	1	1	2	2	2	1	2	2	2	2	2	2	2	2	2	2	2	1	2	1	1	2	2	63	3	3	3	3	4	4	3
2	1	1	2	1	0	1	0	1	2	3	2	2	3	2	2	3	2	2	2	2	2	3	2	2	2	2	3	2	2	2	2	2	3	2	2	2	2	3	2	2	3	75	4	4	4	4	3	4	4
2	1	1	1	3	1	0	1	2	2	2	1	1	2	2	3	3	3	3	2	1	2	1	2	3	2	2	2	1	2	2	2	2	3	2	2	2	1	2	3	3	2	70	3	4	4	4	3	4	4
2	1	1	1	2	1	0	1	3	2	3	2	2	2	2	3	2	2	2	3	3	2	3	3	4	3	2	2	4	2	2	2	2	2	2	3	2	2	3	3	3	3	85	4	4	4	4	4	4	4
2	1	2	1	1	0	0	0	3	3	2	2	3	2	1	3	3	2	2	3	3	2	3	3	3	2	2	3	3	3	3	3	3	3	2	3	4	2	3	3	2	2	89	2	2	3	3	2	1	2
2	1	2	1	2	0	1	0	2	3	3	4	3	4	2	2	2	3	3	4	3	3	4	3	4	2	3	2	4	3	3	3	3	2	3	3	4	3	2	3	3	3	101	4	4	4	3	4	3	3
2	1	1	2	2	1	1	0	3	2	3	2	3	3	3	3	2	3	2	2	1	2	2	2	2	2	2	2	3	2	2	2	2	2	3	2	2	3	2	2	2	2	77	3	3	3	3	3	3	3
2	1	3	1	1	0	0	1	3	3	2	2	2	3	3	2	4	2	2	2	3	2	2	2	2	3	2	2	2	2	2	2	2	2	3	3	3	2	2	3	2	1	79	4	4	3	3	3	4	4
2	1	1	1	1	0	1	1	3	2	2	2	2	3	2	3	2	2	4	2	2	1	3	2	3	2	2	3	2	1	2	3	2	3	3	3	2	3	2	3	3	2	81	3	4	2	2	3	4	4
1	1	1	1	2	0	0	0	3	3	3	3	2	2	3	1	3	3	3	3	3	3	2	2	2	3	3	3	2	2	4	3	1	3	2	2	3	1	3	2	3	3	87	2	2	4	3	3	3	3
1	4	2	1	3	0	1	0	1	2	1	2	2	1	1	2	1	3	1	1	1	1	2	2	1	3	1	2	2	1	1	2	2	2	2	2	1	2	1	2	1	2	54	2	2	3	2	2	3	3
1	4	3	2	2	0	1	0	2	3	2	2	2	3	2	2	1	2	2	3	2	3	1	2	2	2	2	2	2	2	1	3	3	3	3	4	1	1	2	3	2	2	74	3	3	3	4	2	3	3
1	4	3	2	2	1	1	0	2	2	2	2	2	2	2	2	1	3	2	2	2	2	2	2	3	2	3	2	3	2	2	2	2	2	2	2	1	2	3	2	2	2	71	4	4	3	4	4	3	3
1	4	3	1	1	0	1	1	2	1	3	2	3	2	2	3	2	2	3	2	2	2	2	3	3	3	3	2	2	3	3	3	2	2	2	2	2	3	2	3	2	2	80	3	4	4	4	4	4	4
1	4	3	1	2	0	0	0	2	3	3	3	2	3	3	2	3	3	3	3	2	3	2	4	2	3	3	2	2	4	2	3	3	1	3	2	4	3	2	3	3	3	92	3	4	4	4	4	3	4
1	4	3	2	2	0	1	1	1	2	2	2	2	2	2	2	2	2	2	2	2	1	2	1	1	2	2	2	2	3	2	2	2	2	3	2	2	2	2	2	2	2	66	4	4	4	4	4	4	4
1	4	3	2	3	1	0	0	2	3	3	3	3	4	2	4	3	3	3	3	3	3	2	2	4	2	3	3	2	2	2	3	3	3	3	2	4	3	2	3	3	3	96	3	3	2	2	2	4	4
1	4	3	1	2	1	0	0	3	3	3	3	3	3	2	3	3	3	3	2	2	3	4	3	2	3	2	3	3	3	3	4	4	3	3	2	4	3	3	4	3	2	100	2	2	1	2	2	2	1
1	4	3	1	1	1	1	0	2	2	2	2	3	1	2	3	2	2	2	2	1	2	2	2	2	2	2	3	2	2	2	2	3	2	2	3	2	2	2	3	3	2	73	2	3	2	2	2	4	1
1	4	3	1	3	0	1	1	2	2	1	2	2	3	2	2	2	2	1	3	2	2	2	2	3	3	1	2	2	2	3	3	2	2	2	1	2	2	2	2	2	2	70	4	3	2	2	3	3	3
1	4	3	2	2	1	1	1	3	2	2	2	2	3	2	1	3	3	3	2	2	2	2	2	3	1	2	2	2	2	3	2	3	2	2	2	2	2	2	3	2	2	75	3	2	3	3	4	3	3
1	4	3	1	2	1	1	0	3	3	3	3	3	3	3	2	3	2	3	3	2	2	2	2	2	3	2	2	4	3	2	2	3	2	2	3	2	3	2	2	2	3	86	3	3	3	2	3	3	3
1	4	3	2	1	1	1	1	2	2	2	2	3	2	2	2	1	2	2	2	2	3	2	2	2	2	1	1	2	3	2	1	2	2	2	2	2	3	1	1	1	2	65	2	2	3	3	3	3	2
2	4	3	1	1	0	1	0	2	2	2	3	2	3	2	2	2	2	2	2	1	2	3	2	2	2	2	2	3	3	2	2	2	2	1	2	2	2	2	2	2	1	70	3	4	4	3	4	4	4
2	1	3	2	2	0	1	0	2	2	2	2	3	1	3	2	3	2	3	2	2	3	3	2	3	3	2	3	2	2	3	3	2	3	3	2	2	2	2	3	2	3	82	4	3	3	4	4	4	4
2	2	3	2	2	0	0	0	2	2	2	2	3	2	1	1	1	2	2	2	1	3	2	1	2	2	1	2	2	1	3	2	2	1	1	2	2	1	2	2	2	1	60	4	4	4	4	4	4	3
1	2	3	2	1	0	1	0	2	2	2	3	2	2	2	2	2	2	1	2	2	2	2	2	2	1	3	2	2	2	2	2	2	2	1	3	2	2	2	2	2	1	67	4	3	4	4	4	4	4
1	2	3	2	2	0	0	0	3	2	3	3	3	3	3	2	3	3	2	3	2	3	2	2	3	3	3	3	2	4	2	3	2	2	3	2	3	2	2	2	3	3	89	2	3	2	2	2	1	2
1	2	3	1	3	0	1	0	2	2	2	3	2	4	3	2	3	3	2	3	3	2	3	2	2	2	3	2	2	2	2	2	2	3	3	2	2	3	2	2	2	2	81	4	4	4	4	4	4	4
2	2	3	1	2	1	1	1	2	2	2	2	2	1	2	3	2	2	3	3	2	2	2	2	3	1	2	2	1	1	4	2	2	1	2	1	2	2	2	2	2	3	69	4	4	3	4	3	3	4
2	2	3	1	3	1	1	0	3	3	2	2	2	2	3	3	2	3	3	2	3	3	3	3	2	2	3	2	2	2	3	3	2	2	3	3	2	3	3	2	3	3	87	4	4	4	3	3	3	3
1	2	3	2	2	0	1	1	2	2	3	2	2	3	3	3	2	2	3	2	3	3	3	3	3	3	2	2	2	3	2	2	2	2	3	3	2	2	2	2	2	2	82	4	3	4	4	4	4	4
2	2	3	2	3	0	0	0	2	1	2	2	1	3	2	1	1	2	1	2	2	1	1	2	2	3	2	2	1	2	1	2	2	1	2	3	2	2	2	2	2	2	61	4	3	2	4	4	3	3
2	2	3	1	1	1	1	0	2	3	3	4	3	2	2	2	2	3	3	2	2	3	2	1	2	2	3	3	3	2	3	3	3	2	3	3	2	3	3	2	3	3	87	3	3	3	2	4	2	3
2	2	3	2	1	0	1	0	1	2	2	2	3	2	3	3	2	3	2	3	1	2	2	3	2	2	2	3	3	2	2	2	2	3	2	2	2	2	2	3	2	3	77	3	3	2	2	2	3	2
2	2	3	1	2	0	0	0	2	2	2	2	2	2	2	3	2	2	2	2	3	2	2	2	3	2	3	2	4	2	2	2	2	2	2	2	2	3	2	2	3	3	77	4	4	4	3	3	3	4
2	2	2	1	2	0	1	1	2	2	2	2	2	2	2	2	1	2	2	2	2	3	3	3	2	2	2	2	1	2	3	3	1	1	2	2	2	2	3	2	2	2	70	4	4	3	4	3	3	3
1	2	2	1	2	1	0	0	3	2	2	3	2	3	2	3	2	1	3	2	3	1	2	2	2	1	3	2	3	3	2	3	2	3	2	2	2	1	3	2	3	3	78	4	4	4	4	4	4	4
2	2	1	1	1	0	1	1	2	2	2	2	1	2	1	2	1	2	2	3	2	2	2	1	2	2	3	2	2	2	2	2	2	3	2	3	2	2	3	3	2	2	70	4	4	3	4	3	4	3
[truncated: 31 more columns]
